# Supplementary material
Source: PubMed Central journal article supplement (PMC11227883)
Supplement: NIHMS2004579-supplement-SI.pdf [file NIHMS2004579-supplement-SI.pdf]

1 Restoring and enhancing the potency of existing antibiotics against drug-resistant  
2 Gram-negative bacteria through the development of potent small-molecule  
3 adjuvants  
4

5 Bingchen Yu,<sup>1,†</sup> Manjusha Roy Choudhury,<sup>1,†</sup> Xiaoxiao Yang,<sup>1,†</sup> Stéphane L. Benoit,<sup>2</sup>  
6 Edroyal Womack,<sup>3</sup> Kristin Van Mouwerik Lyles,<sup>3</sup> Atanu Acharya,<sup>4</sup> Arvind Kumar,<sup>1</sup> Ce Yang,<sup>1</sup>  
7 Anna Pavlova,<sup>4</sup> Mengyuan Zhu,<sup>1</sup> Zhengnan Yuan,<sup>1</sup> James C. Gumbart,<sup>4</sup> David W. Boykin,<sup>1</sup> Robert  
8 J. Maier,<sup>2</sup> Zehava Eichenbaum,<sup>3</sup> and Binghe Wang<sup>1,\*</sup>  
9

10 \*Corresponding author. Email:wang@gsu.edu  
11

12 This SI file includes:

13 Figs. S1 to S4

14 Tables S1 to S9

15 Scheme S1 to S2

16 <sup>1</sup>H NMR and <sup>13</sup>C NMR spectra for all synthesized compounds  
17  
18  
19  
20  
21  
22  
23  
24  
25  
26  
27  
28  
29  
30

31

## 32 Tables, figures and schemes

| <b>Table S1. Activity and cytotoxicity comparison of lead bacterial sensitizer</b>                                                                                                                                          |                                                                                     |                    |                                     |
|-----------------------------------------------------------------------------------------------------------------------------------------------------------------------------------------------------------------------------|-------------------------------------------------------------------------------------|--------------------|-------------------------------------|
| Compound Name                                                                                                                                                                                                               | Structure                                                                           | Sensitization fold | IC <sub>50</sub> on mammalian cells |
| DB2560<br>(MD-100)                                                                                                                                                                                                          | 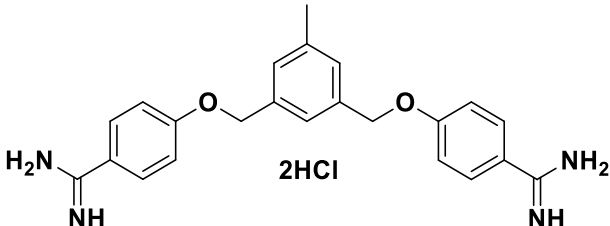  | 32 <sup>a</sup>    | 100 μM                              |
| DB1213                                                                                                                                                                                                                      |    | 32 <sup>a</sup>    | 50 μM                               |
| DB1079                                                                                                                                                                                                                      |  | 64 <sup>b</sup>    | 12 μM                               |
| DB704                                                                                                                                                                                                                       |  | 16 <sup>a</sup>    | 100 μM                              |
| Sensitization fold was tested on <i>E.coli</i> using rifampicin as antibiotic. a: 10 μg/ml bacterial sensitizer was used; b: 5 μg/ml bacterial sensitizer was used; IC <sub>50</sub> was tested on HEK293 and NIH3T3 cells. |                                                                                     |                    |                                     |

33

34

35

36

37

38

39

40

41

42 **Scheme S1. General synthetic methods for diamidine compounds**

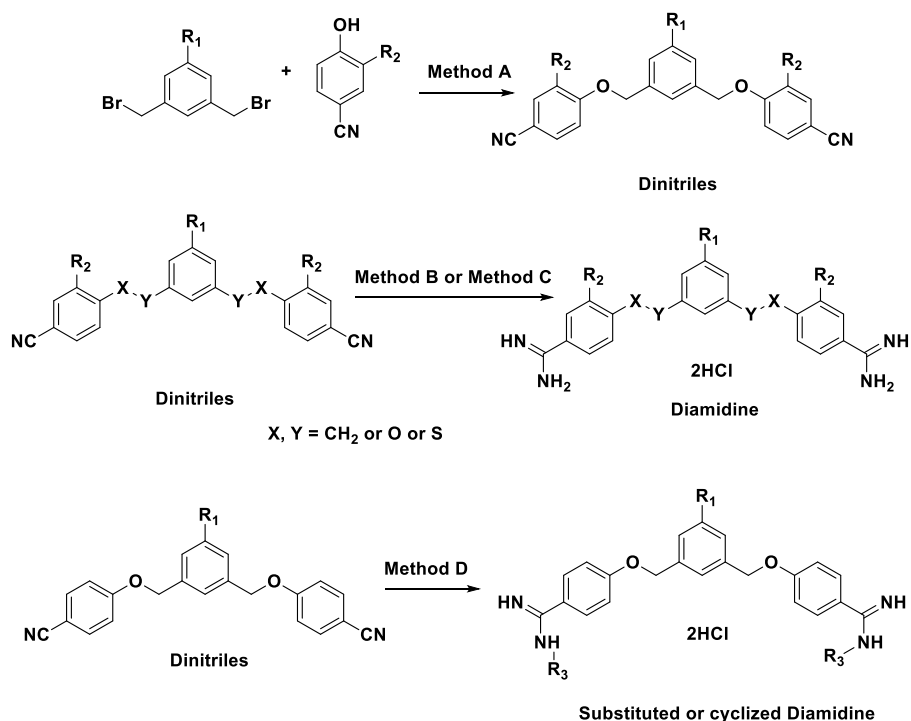

43

44 **General procedures for the preparation of dinitriles (Method A)**

45 A mixture of 1,3-bis (bromomethyl)-benzene/substituted benzene (5 mmol), 4-

46 hydroxybenzonitrile or 4-hydroxy substituted benzonitrile (10 mmol) and anhydrous K<sub>2</sub>CO<sub>3</sub> (2.07

47 g, 15 mmol) in 10 mL DMF was heated at 45 °C for 4 h. Then the reaction mixture was diluted

48 with ice water (70 mL) and stirred for 30 min. The white precipitate was filtered, washed with

49 water, and dried in air. Then the white solid was dissolved in organic solvent (75 mL) (DCM,

50 methanol or THF). The organic phase was dried over anhydrous MgSO<sub>4</sub>. MgSO<sub>4</sub> was then filtered

51 and the supernatant was concentrated with rotavapor to afford crude product. The crude product

52 was then triturated with hexane, filtered and dried *in vacuum* to yield white solid in 80-90% yield.

53 **General procedures for diamidines as dihydrochloride salt (Method B)**

54 To a cold and stirred suspension of dinitrile (1 mmol) in 15 mL dry THF was added 6.0

55 mL (6 mmol) of LiN(TMS)<sub>2</sub> (1M in THF). The reaction was stirred for 24 h at r.t. Then the mixture

56 was cooled and acidified with saturated ethanolic-HCl to form a white solid. The mixture was  
57 stirred for 2 h, after which all solvents were removed under vacuum to afford a crude product. The  
58 crude product was then diluted with ether and the mixture was filtered to obtain a white solid. The  
59 white solid was then diluted with 10 mL ice water, basified with 2M NaOH to afford a white  
60 precipitate. The white precipitate was then filtered, washed with water and dried in air. The solid  
61 was suspended in anhydrous ethanol (15 mL) and 5 mL saturated ethanolic HCl for 6 h. Then  
62 ethanol was distilled off and the product was triturated with dry ether and filtered. The solid was  
63 dried *in vacuum* at 80 °C for 12 h to yield (65-75%) diamidine dihydrochloride as white solid.

#### 64 **General procedures for diamidines as dihydrochloride salt (Method C)**

65 Dinitrile (1 mmol) was added to anhydrous EtOH saturated with hydrogen chloride (20 mL)  
66 at 0 °C in a dry flask. The reaction mixture was then sealed, slowly warmed to ambient temperature,  
67 and stirred for 7 days. Ethanol was removed using rotary evaporator. Anhydrous diethyl ether (20  
68 mL) was added to the reaction mixture and the precipitated imidate ester dihydrochloride was  
69 filtered off and dried under high vacuum. Ammonia gas (using a cylinder) was passed through  
70 imidate ester in EtOH (10 mL) and stirred for a day. The reaction mixture was concentrated *in*  
71 *vacuum*. Then anhydrous ether was added, and the product was filtered and dried under vacuum.  
72 The diamidine was converted to its dihydrochloride salt by stirring the diamidine with saturated  
73 ethanolic HCl (2 mL) for 2-3h. The solvent was removed, and the solid was dried *in vacuum* at 80  
74 °C for 12 h to yield final product (65-75%).

#### 75 **General procedure for the preparation of substituted diamidine or cyclized diamidine as** 76 **dihydrochloride salts (Method D)**

77           The nitrile compound was added to anhydrous EtOH saturated with hydrogen chloride at  
78 0 °C in a dry flask. The reaction mixture was then sealed, slowly warmed to ambient temperature,  
79 and stirred until the nitrile compound was no longer detectable by TLC. The reaction mixture was  
80 diluted with anhydrous ether. The precipitated imidate ester dihydrochloride was filtered off under  
81 nitrogen and dried under high vacuum. The imidate was then reacted immediately with 2.5  
82 equivalents of the appropriate amine in EtOH for 24h. The reaction mixture was concentrated *in*  
83 *vacuum*. Then ether was added, and the product was filtered. The solid was suspended in 10 mL  
84 ice-water and basified with 2M NaOH. The resulting white precipitate was filtered, washed with  
85 water, and air dried. The free base was converted to its dihydrochloride salt using saturated  
86 ethanolic HCl as white solid, which was dried *in vacuum* at 80 °C for 12 h to yield final product  
87 (65-75%).

88

| <b>Table S2A. MD-124 sensitizes wild-type <i>E. coli</i> (ATCC 25922 ) towards various antibiotics</b> |                        |                                       |                                        |
|--------------------------------------------------------------------------------------------------------|------------------------|---------------------------------------|----------------------------------------|
| Antibiotics (AB)                                                                                       | MIC of AB (µg/ml) only | MIC of AB (µg/ml) with 5 µg/ml MD-124 | Sensitization fold with 5 µg/ml MD-124 |
| Rifampicin                                                                                             | 10                     | 0.019                                 | <b>512</b>                             |
| Rifapentine                                                                                            | 25                     | 0.8                                   | <b>32</b>                              |
| Rifaximin                                                                                              | 12.5                   | 0.2                                   | <b>64</b>                              |
| Clarithromycin                                                                                         | 50                     | 0.2                                   | <b>256</b>                             |
| Erythromycin                                                                                           | 50                     | 0.4                                   | <b>128</b>                             |
| Azithromycin                                                                                           | 6.2                    | 0.4                                   | <b>16</b>                              |
| Novobiocin                                                                                             | 100                    | 1.6                                   | <b>64</b>                              |
| Clindamycin                                                                                            | 200                    | 3.2                                   | <b>64</b>                              |
| Fusidic acid                                                                                           | >200                   | 6.25                                  | <b>&gt;32</b>                          |
| Polymyxin B                                                                                            | 1.2                    | 0.04                                  | <b>32</b>                              |
| Chloramphenicol                                                                                        | 12.5                   | 1.6                                   | <b>8</b>                               |
| Trovafloxacin                                                                                          | 0.05                   | 0.0015                                | <b>32</b>                              |
| Besifloxacin                                                                                           | 0.1                    | 0.0125                                | <b>8</b>                               |
| Moxifloxacin                                                                                           | 0.05                   | 0.0062                                | <b>8</b>                               |
| Levofloxacin                                                                                           | 0.05                   | 0.0062                                | <b>8</b>                               |
| Ciprofloxacin                                                                                          | 0.05                   | 0.0125                                | <b>4</b>                               |
| Nafcillin                                                                                              | >300                   | 75                                    | <b>&gt;4</b>                           |
| Cloxacillin                                                                                            | >300                   | 75                                    | <b>&gt;4</b>                           |
| Meropenem                                                                                              | 0.063                  | 0.063                                 | <b>1</b>                               |
| Tetracycline                                                                                           | 1.2                    | 0.6                                   | <b>2</b>                               |
| Trimethoprim                                                                                           | 2.5                    | 1.25                                  | <b>2</b>                               |

92

| <b>Table S2B. MD-124 sensitizes wild-type <i>E. coli</i> (ATCC 10536) towards rifampicin</b> |                                                     |                    |
|----------------------------------------------------------------------------------------------|-----------------------------------------------------|--------------------|
| MD-124 Conc (µg/ml)                                                                          | MIC of rifampicin in the presence of MD-124 (µg/ml) | Sensitization fold |
| 4                                                                                            | 0.62                                                | 16                 |
| 5                                                                                            | 0.16                                                | 64                 |
| 6                                                                                            | 0.04                                                | 256                |
| 7                                                                                            | 0.04                                                | 256                |
| MIC of rifampicin on wild-type <i>E. coli</i> is 10 µg/ml.                                   |                                                     |                    |

93

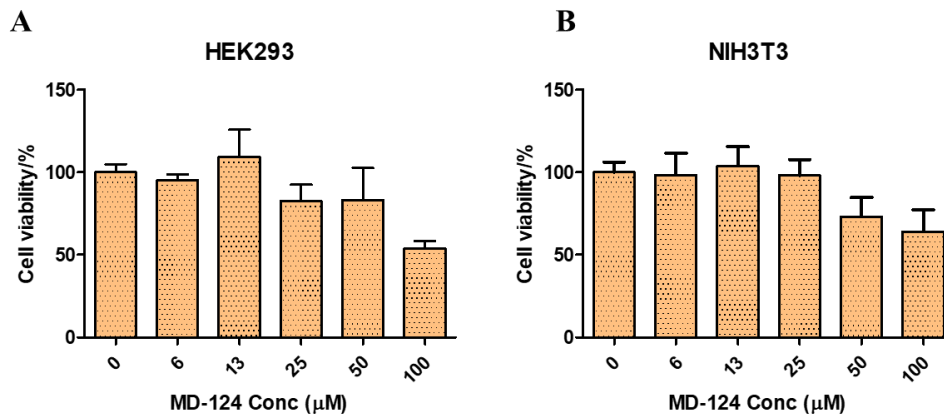

94

95 **Figure S1.** Cytotoxicity test of MD-124 on HEK293 cells (A) and NIH3T3 cells (B). Cells were  
96 incubated with various concentrations of MD-124 at 37 °C with an atmosphere of 5% CO<sub>2</sub> for 24  
97 h, then cell viability was determined by CCK-8. Values are means ± SD. n = 3.

98

99

100

101

102

103

104

105

106

107

| <b>Table S3. MD-124 overcomes Gram-negative ESKAPE bacterial drug-resistance.</b> |                        |                    |                                       |                                       |        |
|-----------------------------------------------------------------------------------|------------------------|--------------------|---------------------------------------|---------------------------------------|--------|
|                                                                                   | MIC of Rifampicin only | MIC of MD-124 only | MIC of rifampicin with 5 µg/ml MD-124 | MIC of rifampicin with 7 µg/ml MD-124 | FIC    |
| <i>A. baumannii</i>                                                               | 5                      | 25                 | 0.04                                  | 0.01                                  | 0.14   |
| <i>K. pneumoniae</i>                                                              | 40                     | 25                 | 0.64                                  | 0.32                                  | 0.15   |
| NDM-1 <i>E. coli</i>                                                              | 10                     | 50                 | 0.02                                  | 0.0024                                | 0.09   |
| MCR-1 <i>E. coli</i>                                                              | 5                      | 12.5               | 0.016                                 | 0.08                                  | 0.37   |
| MDR <i>K. pneumoniae</i>                                                          | >160                   | >50                | 10                                    | 0.16                                  | < 0.16 |
| MDR <i>S. Typhimurium</i>                                                         | 20                     | >50                | 1.25                                  | 0.04                                  | < 0.16 |
| Concentration unit for rifampicin and MD-124: µg/ml                               |                        |                    |                                       |                                       |        |

109

110

111

112

113

114

115

116

117

118

119

120

121



| <b>Table S4. MD-124 sensitizes wild-type <i>A. baumannii</i> towards various antibiotics</b> |                        |                                       |                                        |
|----------------------------------------------------------------------------------------------|------------------------|---------------------------------------|----------------------------------------|
| Antibiotics (AB)                                                                             | MIC of AB (µg/ml) only | MIC of AB (µg/ml) with 5 µg/ml MD-124 | Sensitization fold with 5 µg/ml MD-124 |
| Rifampicin                                                                                   | 5                      | 0.04                                  | <b>128</b>                             |
| Clarithromycin                                                                               | 25                     | 0.4                                   | <b>64</b>                              |
| Novobiocin                                                                                   | 25                     | 0.8                                   | <b>32</b>                              |
| Fusidic acid                                                                                 | 50                     | 0.4                                   | <b>128</b>                             |
| Clindamycin                                                                                  | 100                    | 12.5                                  | <b>8</b>                               |
| Polymyxin B                                                                                  | 1.6                    | 0.04                                  | <b>4</b>                               |
| Chloramphenicol                                                                              | 100                    | 25                                    | <b>4</b>                               |
| Ciprofloxacin                                                                                | 0.05                   | 0.0125                                | <b>4</b>                               |
| Trimethoprim                                                                                 | 25                     | 12.5                                  | <b>2</b>                               |
| Tetracycline                                                                                 | 1.2                    | 0.6                                   | <b>2</b>                               |
| Trovafloxacin                                                                                | 0.032                  | 0.016                                 | <b>2</b>                               |
| Kanamycin                                                                                    | 12.5                   | 0.62                                  | <b>2</b>                               |
| Nafcillin                                                                                    | 200                    | 100                                   | <b>2</b>                               |
| MIC of MD-124 on <i>A. baumannii</i> is 25 µg/ml.                                            |                        |                                       |                                        |

123

124

125

126

127

128

129

130

131

| <b>Table S5. MD-124 sensitizes wild-type <i>K. pneumoniae</i> towards various antibiotics</b> |                        |                                       |                                        |
|-----------------------------------------------------------------------------------------------|------------------------|---------------------------------------|----------------------------------------|
| Antibiotics (AB)                                                                              | MIC of AB (µg/ml) only | MIC of AB (µg/ml) with 5 µg/ml MD-124 | Sensitization fold with 5 µg/ml MD-124 |
| Rifampicin                                                                                    | 40                     | 0.016                                 | <b>252</b>                             |
| Clarithromycin                                                                                | 200                    | 0.8                                   | <b>252</b>                             |
| Novobiocin                                                                                    | 200                    | 6.4                                   | <b>32</b>                              |
| Chloramphenicol                                                                               | >100                   | 1.6                                   | <b>&gt;64</b>                          |
| Clindamycin                                                                                   | >200                   | 25                                    | <b>&gt;8</b>                           |
| Fusidic acid                                                                                  | 100                    | 25                                    | <b>4</b>                               |
| MIC of MD-124 on <i>K. pneumoniae</i> is 25 µg/ml.                                            |                        |                                       |                                        |

132

133

| <b>Table S6. NDM-1-expressing <i>E.coli</i> exhibits drug-resistance towards β-lactam antibiotics</b> |                                        |                                               |
|-------------------------------------------------------------------------------------------------------|----------------------------------------|-----------------------------------------------|
| Antibiotics                                                                                           | MIC on wild-type <i>E.coli</i> (µg/ml) | MIC on NDM-1-expressing <i>E.coli</i> (µg/ml) |
| Ampicillin                                                                                            | 6                                      | > 300                                         |
| Ceftazidime                                                                                           | < 0.2                                  | > 6.25                                        |
| Meropenem                                                                                             | 0.03                                   | 12.5                                          |

134

135

136

137

138

139

140

141

| <b>Table S7. MD-124 sensitizes on NDM-1-expressing <i>E.coli</i> towards various antibiotics</b> |                                     |                                                               |                                                   |
|--------------------------------------------------------------------------------------------------|-------------------------------------|---------------------------------------------------------------|---------------------------------------------------|
| Antibiotics (AB)                                                                                 | MIC of AB ( $\mu\text{g/ml}$ ) only | MIC of AB ( $\mu\text{g/ml}$ ) with 5 $\mu\text{g/ml}$ MD-124 | Sensitization fold with 5 $\mu\text{g/ml}$ MD-124 |
| Rifampicin                                                                                       | 10                                  | 0.02                                                          | <b>512</b>                                        |
| Clarithromycin                                                                                   | 25                                  | 0.4                                                           | <b>64</b>                                         |
| Novobiocin                                                                                       | 50                                  | 1.6                                                           | <b>32</b>                                         |
| Clindamycin                                                                                      | 200                                 | 3.2                                                           | <b>64</b>                                         |
| Trovaflaxacin                                                                                    | 0.025                               | 0.0008                                                        | <b>32</b>                                         |
| Chloramphenicol                                                                                  | 12.5                                | 1.6                                                           | <b>8</b>                                          |
| Polymyxin B                                                                                      | 2.5                                 | 0.32                                                          | <b>8</b>                                          |
| Tetracycline                                                                                     | 12.5                                | 3.2                                                           | <b>4</b>                                          |
| Meropenem                                                                                        | 12.5                                | 6.2                                                           | <b>2</b>                                          |
| Ampicillin                                                                                       | >300                                | 300                                                           | <b>&gt;1</b>                                      |
| MIC of MD-124 on NDM-1-expressing <i>E. coli</i> is 50 $\mu\text{g/ml}$ .                        |                                     |                                                               |                                                   |

142

| <b>Table S8. MD-124 sensitizes on <i>mcr-1</i>-expressing <i>E.coli</i> towards various antibiotics</b>                                                                                            |                                                     |                                                               |                                                   |
|----------------------------------------------------------------------------------------------------------------------------------------------------------------------------------------------------|-----------------------------------------------------|---------------------------------------------------------------|---------------------------------------------------|
| <i>Antibiotics (AB)</i>                                                                                                                                                                            | <i>MIC of AB (<math>\mu\text{g/ml}</math>) only</i> | MIC of AB ( $\mu\text{g/ml}$ ) with 5 $\mu\text{g/ml}$ MD-124 | Sensitization fold with 5 $\mu\text{g/ml}$ MD-124 |
| Rifampicin                                                                                                                                                                                         | 5                                                   | 0.16                                                          | <b>32</b>                                         |
| Clarithromycin                                                                                                                                                                                     | 25                                                  | 0.2                                                           | <b>128</b>                                        |
| Polymyxin B                                                                                                                                                                                        | 30                                                  | 0.93                                                          | <b>32</b>                                         |
| The MIC of polymyxin B on this <i>mcr-1</i> -expressing <i>E. coli</i> strain is 30 $\mu\text{g/ml}$ .<br>MIC of MD-124 on this <i>mcr-1</i> -expressing <i>E. coli</i> is 12.5 $\mu\text{g/ml}$ . |                                                     |                                                               |                                                   |

143

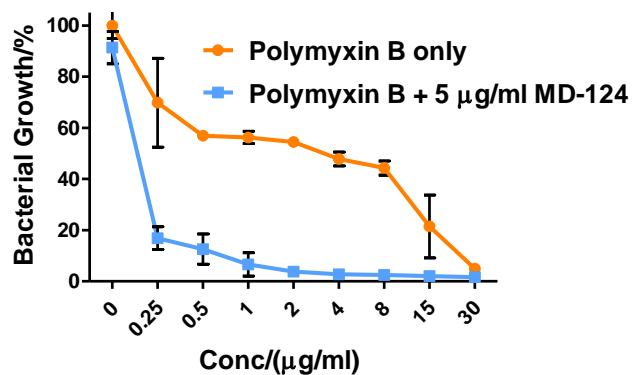

144 **Figure S2.** 5 µg/ml MD-124 sensitizes *mcr-1*- expressing *E. coli* towards polymyxin B. *E. coli*  
 145 was cultured with the polymyxin B at various concentrations in the presence or absence of 5 µg/ml  
 146 MD-124 for 24 h at 37 °C. Then bacterial growth density was determined by measuring OD<sub>600</sub>.  
 147 Values are means ± SD. n = 3.

| <b>Table S9. MIC of various antibiotics on MDR <i>K. pneumoniae</i> and MDR <i>S. Typhimurium</i></b> |                                               |                                                |
|-------------------------------------------------------------------------------------------------------|-----------------------------------------------|------------------------------------------------|
| Antibiotics (AB)                                                                                      | MIC of AB (µg/ml) on MDR <i>K. pneumoniae</i> | MIC of AB (µg/ml) on MDR <i>S. Typhimurium</i> |
| Rifampicin                                                                                            | >160                                          | 40                                             |
| Erythromycin                                                                                          | >160                                          | >160                                           |
| Clarithromycin                                                                                        | >160                                          | >160                                           |
| Novobiocin                                                                                            | >160                                          | >160                                           |
| Clindamycin                                                                                           | >160                                          | >160                                           |
| Polymyxin B                                                                                           | 5                                             | 10                                             |
| Chloramphenicol                                                                                       | >160                                          | 80                                             |
| Trimethoprim                                                                                          | >160                                          | >160                                           |
| Tetracycline                                                                                          | 20                                            | 160                                            |
| Trovafloxacin                                                                                         | 20                                            | 20                                             |
| Moxifloxacin                                                                                          | 40                                            | 40                                             |
| Kanamycin                                                                                             | >160                                          | 20                                             |
| Ampicillin                                                                                            | >160                                          | >160                                           |
| Methicillin                                                                                           | >160                                          | >160                                           |

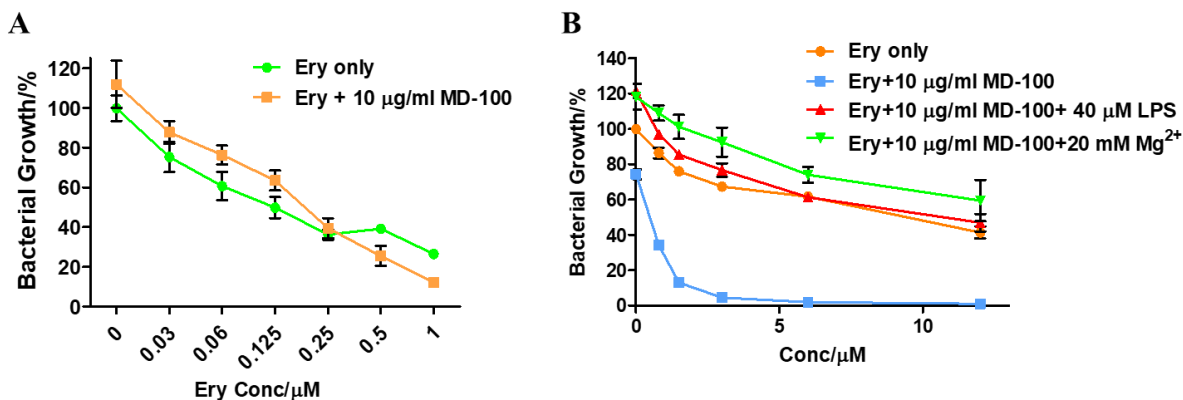

149  
 150 **Figure S3.** Molecular mechanism study of bacterial sensitizers. **A**, MD-100 failed to sensitize *E.*  
 151 *coli* strain NR698 towards erythromycin, a strain with outer membrane “leaky” phenotype. 10  
 152 µg/ml MD-100 sensitized wild-type *E. coli* towards erythromycin for 32-fold (The comparison  
 153 between the blue and orange line in **Figure b**). *E. coli* NR698 was cultured with the antibiotic at  
 154 various concentrations in the presence or absence of bacterial sensitizer for 24 h at 37 °C. Then  
 155 bacterial growth density was determined by measuring OD<sub>600</sub>. **B**, LPS and high concentration of  
 156 Mg<sup>2+</sup> decreased the sensitization ability of MD-100. *E. coli* was treated with 10 µg/ml MD-100  
 157 and erythromycin combination in the presence and absence of 40 µM LPS for 24 h at 37 °C. Then  
 158 the growth density/% was calculated based on OD<sub>600</sub>. *E. coli* was treated with 10 µg/ml MD-100  
 159 and erythromycin combination in the presence and absence of 20 mM Mg<sup>2+</sup> for 24 h at 37 °C, then  
 160 the growth density/% was calculated based on OD<sub>600</sub>. Values are means ± SD. n = 3.

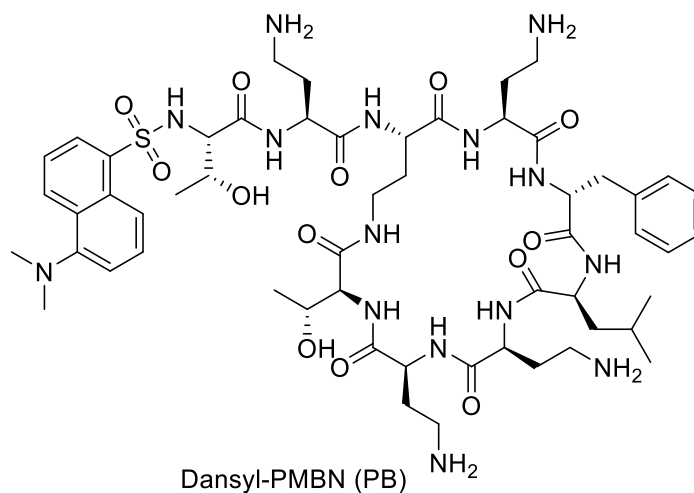

165  
 166 **Scheme S2.** Structure of Dansyl-PMBN (PB)

167

168

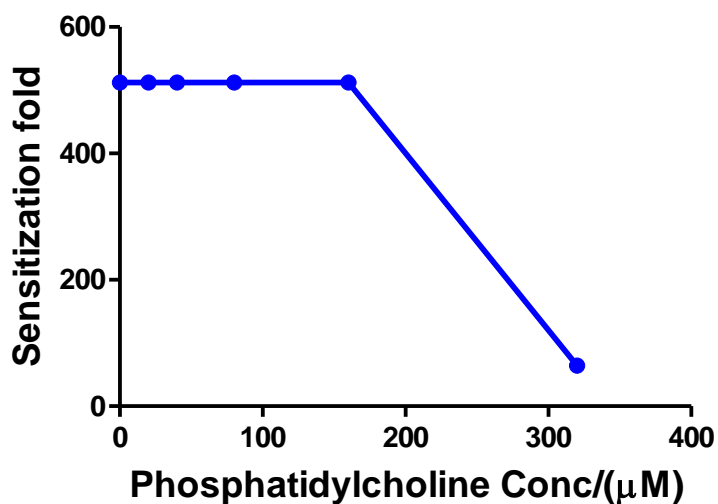

169 **Figure S4.** The effect of phosphatidylcholine on MD-124 sensitization activity. *E. coli* was treated  
170 with 10 μM MD-124 (about 5 μg/ml) and rifampicin combination with varying concentrations of  
171 phosphatidylcholine (from 0 to 320 μM) for 24 h at 37 °C, then the OD<sub>600</sub> was measured and the  
172 sensitization folds were calculated as mentioned above. All results were of triplicates.

173

174 **Synthesis of MD-100**

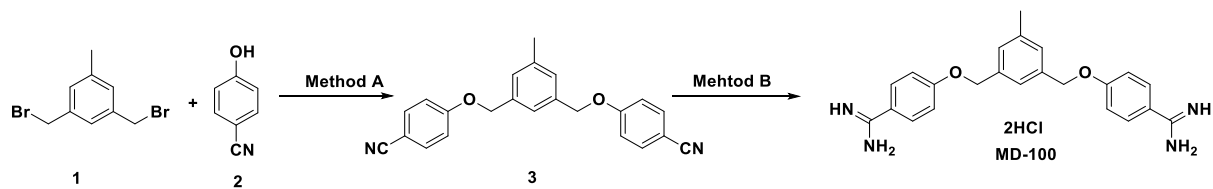

176 *Synthesis of 4,4'-(((5-methyl-1,3-phenylene)bis(methylene))bis(oxy))dibenzonitrile (3).* Reaction  
 177 of 1,3-bis (bromomethyl)-5-methylbenzene (**1**, 1.38 g, 5 mmol) and 4-hydroxybenzonitrile (**2**, 1.19  
 178 g, 10 mmol) in the presence of anhydrous  $K_2CO_3$  (2.07 g, 15 mmol) in 10 mL DMF yielded 1, 3-  
 179 bis (4-cyano-phenoxy methyl)-5-methyl-benzene as white solid (**3**, 1.58 g, 90%) using method A.  
 180  $^1H$  NMR ( $CDCl_3$ ):  $\delta$  7.59 (d,  $J = 8.8$  Hz, 4H), 7.26 (s, 1H), 7.22 (s, 2H), 7.02 (d,  $J = 8.8$  Hz, 4H),  
 181 5.09 (s, 4H), 2.40 (s, 3H).  $^{13}C$  NMR ( $CDCl_3$ ):  $\delta$  161.9, 139.3, 136.4, 134.1, 128.3, 123.7, 119.2,  
 182 115.6, 104.3, 70.1, 21.4. HRMS calcd for  $C_{23}H_{18}N_2O_2Na$   $[M+Na]^+$  : 377.1266, found: 377.1269.

183 *Synthesis of 4,4'-(((5-methyl-1,3-phenylene)bis(methylene))bis(oxy))dibenzimidamide*  
 184 *dihydrochloride (MD-100).* **3** (0.354 g, 1 mmol) was converted to **MD-100** as brown solid  
 185 following method B (**MD-100**, 0.33 g, 71%).  $^1H$  NMR ( $DMSO-d_6$ ):  $\delta$  9.24 (s, 4H), 8.90 (s, 4H),  
 186 7.82 (d,  $J = 8.8$  Hz, 4H), 7.34 (s, 1H), 7.25 (s, 2H), 7.20 (d,  $J = 8.8$  Hz, 4H), 5.18 (s, 4H), 2.32 (s,  
 187 3H).  $^{13}C$  NMR ( $DMSO-d_6$ ):  $\delta$  165.0, 162.9, 138.6, 136.9, 130.5, 128.5, 124.6, 120.0, 115.5, 69.9,  
 188 21.2. HRMS calcd for  $C_{23}H_{25}N_4O_2$   $[M+H]^+$ : 389.1972, found: 389.1976.

189 **Synthesis of MD-101**

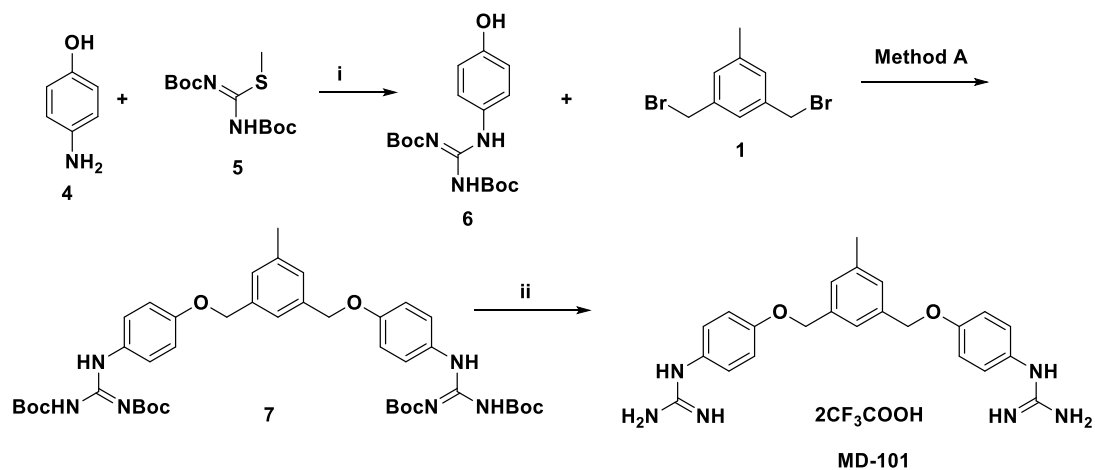

190 i) 0 °C , 10 min, HgCl<sub>2</sub>, 20 h ii) TFA, DCM, rt, 2h.

191 *Synthesis of p-[N', N''-Di(Boc)guanidino]phenol (6).* p-aminophenol (**4**, 1.64 g, 15.0 mmol) and  
 192 N,N'-Di(Boc)-S-methylisothiourea (**5**, 2.90 g, 10.0 mmol) were stirred in THF (100 mL) for 10  
 193 minutes after which the reaction was cooled to 0°C. HgCl<sub>2</sub> (2.99 g, 11.0 mmol) was added slowly  
 194 to this solution and stirred for 20 h. The reaction mixture was concentrated and purified with  
 195 column chromatography using 5:1 Hexane: EA as eluant to give p-[N', N''-  
 196 Di(Boc)guanidino]phenol (**6**) as a white solid (3.16 g, 60%).<sup>1</sup> <sup>1</sup>H NMR (CDCl<sub>3</sub>): δ 11.61 (s, 1H),  
 197 9.96 (s, 1H), 7.01 (d, *J* = 8.8 Hz, 2 H), 6.58 (d, *J* = 8.8 Hz, 2 H), 1.53 (s, 9 H), 1.44 (s, 9 H). <sup>13</sup>C  
 198 NMR (CDCl<sub>3</sub>): δ 156.1, 155.7, 153.3, 126.7, 116.4, 84.0, 80.4, 28.3, 28.2. HRMS calcd for  
 199 C<sub>17</sub>H<sub>26</sub>N<sub>3</sub>O<sub>5</sub> [M+H]<sup>+</sup>: 352.1872, found 352.1863.

200 *Synthesis of 1,1'-((((5-methyl-1,3-phenylene)bis(methylene))bis(oxy))bis(4,1-  
 201 phenylene))diguanidine di(trifluoroacetate).* Reaction of 1,3-bis (bromomethyl)-5-methylbenzene  
 202 (**1**, 0.36 g, 1.3 mmol), p-[N',N''-Di(Boc)guanidino]phenol (**6**, 1.0 g, 2.84 mmol) and K<sub>2</sub>CO<sub>3</sub> (0.54  
 203 g, 3.9 mmol) yielded 1,3-Bis -5-methylbenzene (**7**) as white solid (0.74 g, 70%) using method A.  
 204 Compound **7** (32 mg, 0.039 mmol) in DCM (2 mL) was treated with TFA (1 mL) for 2 h The  
 205 solvent was removed in vacuo to yield 1,3-Bis -5-methylbenzene di(trifluoroacetate) (**MD-101**)



206 salt as a white solid (**MD-101**, 20 mg, 80%). <sup>1</sup>H NMR (MeOD): δ 7.33 (s, 1H), 7.23 (s, 2H), 7.22-  
207 7.20 (m, 4H), 7.09- 7.07 (m, 4H), 5.09 (s, 4H), 2.36 (s, 3H). <sup>13</sup>C NMR (MeOD): δ 159.8, 158.5,  
208 139.8, 138.7, 128.8, 128.8, 128.6, 124.8, 117.2, 71.1, 21.4. HRMS calcd for C<sub>23</sub>H<sub>27</sub>N<sub>6</sub>O<sub>2</sub> [M+H]<sup>+</sup>:  
209 419.2195, found 419.2212.

## 210 Synthesis of MD-102

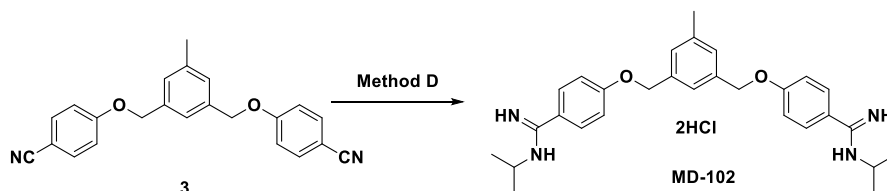

212 *Synthesis of 4,4'-(((5-methyl-1,3-phenylene)bis(methylene))bis(oxy))bis(N-*  
213 *isopropylbenzimidamide) dihydrochloride (MD-102).* Dinitrile (**3**, 0.35 g, 1 mmol) was converted  
214 to **MD-102** by the reaction with isopropyl amine (0.15 g, 2.5 mmol) in ethanol (10 mL) at r.t. for  
215 24h as pale yellow solid using general method D (**MD-102**, 0.27 g, 50%). <sup>1</sup>H NMR (DMSO-d<sub>6</sub>):  
216 δ 9.43 (d, *J* = 8.0 Hz, 2H), 9.33 (s, 2H), 8.99 (s, 2H), 7.73 (d, *J* = 8.8 Hz, 4H), 7.36 (s, 1H), 7.27  
217 (s, 2H), 7.21 (d, *J* = 8.8 Hz, 4H), 5.20 (s, 4H), 4.09-4.04 (m, 2H), 2.34 (s, 3H), 1.26 (d, *J* = 6.4  
218 Hz, 12H). <sup>13</sup>C NMR (DMSO-d<sub>6</sub>): δ 162.1, 161.2, 138.1, 136.7, 130.3, 128.1, 124.3, 121.2, 114.9,  
219 69.5, 54.9, 44.9, 21.3, 21.0. HRMS calcd for C<sub>29</sub>H<sub>38</sub>N<sub>4</sub>O<sub>2</sub> [M+2H]<sup>2+</sup>/2: 237.1492, found 237.1482.

## 220 Synthesis of MD-103

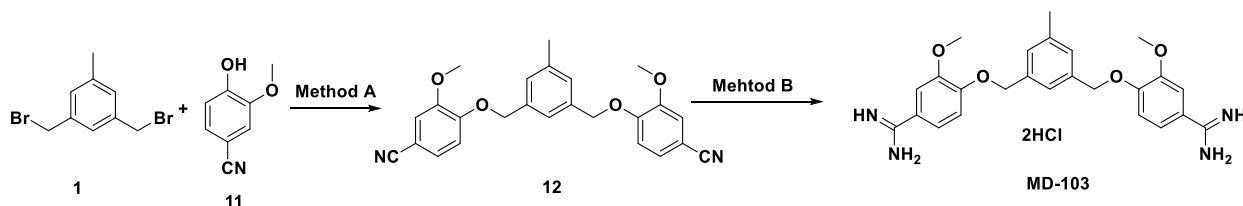

222 *Synthesis of 4,4'-(((5-methyl-1,3-phenylene)bis(methylene))bis(oxy))bis(3-methoxybenzotrile)*  
223 **(12)**. Reaction of 1,3-bis (bromomethyl)-5-methylbenzene (**1**, 1.4 g, 5 mmol) and 4-hydroxy- 2-  
224 methoxybenzotrile (**11**, 1.37 g, 10 mmol) the presence of anhydrous K<sub>2</sub>CO<sub>3</sub> (2.07 g, 15 mmol)  
225 in 10 mL DMF yielded 4,4'-(((5-methyl-1,3-phenylene)bis(methylene))bis(oxy))bis(3-  
226 methoxybenzotrile) as white solid (**12**, 1.57 g, 76%) following method A. <sup>1</sup>H NMR (DMSO-d<sub>6</sub>):  
227 δ 7.41-7.39 (m, 4H), 7.30 (s, 1H), 7.24 (s, 2H), 7.18 (d, *J* = 8.8 Hz, 2H), 5.15 (s, 4H), 3.80 (s, 6H),  
228 2.33 (s, 3H). <sup>13</sup>C NMR (DMSO-d<sub>6</sub>): δ 151.8, 149.2, 138.0, 136.5, 128.5, 126.3, 124.6, 119.2, 114.7,  
229 113.4, 102.9, 69.9, 56.0, 21.0. HRMS calcd for C<sub>25</sub>H<sub>23</sub>N<sub>2</sub>O<sub>4</sub>[M+H]<sup>+</sup>: 415.1652, found 415.1643.

230 *Synthesis of 4,4'-(((5-methyl-1,3-phenylene)bis(methylene))bis(oxy))bis(3-methoxybenzimidamide)*  
231 *dihydrochloride (MD-103)*. Dinitrile (**12**, 0.41 g, 1 mmol) was converted to yield 4,4'-(((5-methyl-  
232 1,3-phenylene)bis(methylene))bis(oxy))bis(3-methoxybenzimidamide) dihydrochloride as brown  
233 solid following method B (**MD-103**, 0.39 g, 76%). <sup>1</sup>H NMR (DMSO-d<sub>6</sub>): δ 9.27 (s, 4H), 8.97 (s,  
234 4H), 7.49 - 7.48 (m, 4H), 7.33 (s, 1H), 7.26 - 7.24 (m, 4H), 5.18 (s, 4H), 3.86 (s, 6H), 2.34 (s, 3H).  
235 <sup>13</sup>C NMR (DMSO-d<sub>6</sub>): δ 164.7, 152.3, 148.81, 138.1, 136.7, 128.5, 124.7, 121.9, 119.5, 112.8,  
236 111.6, 70.0, 56.1, 21.0. HRMS calcd for C<sub>25</sub>H<sub>30</sub>N<sub>4</sub>O<sub>4</sub> [M+2H]<sup>2+</sup>/2: 225.1128, found 225.1119.

237 **Synthesis of MD-105**

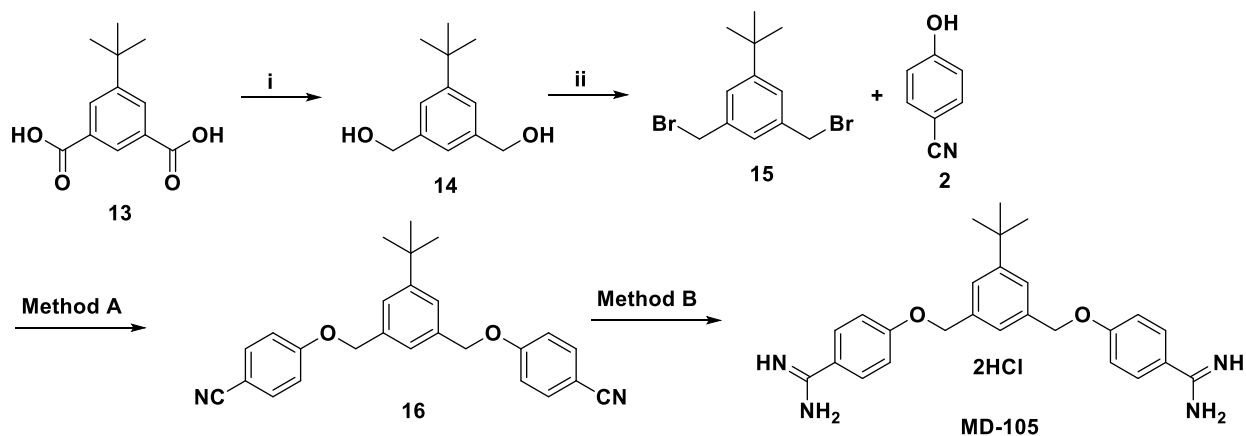

238 (i) LiAlH<sub>4</sub>, THF, 0 °C - rt, overnight (ii) PBr<sub>3</sub>, CH<sub>2</sub>Cl<sub>2</sub>, 0 °C - r.t., 4h.

239 *Synthesis of diol (5-(tert-butyl)-1,3-phenylene)dimethanol (14).* 5-tert-butylisophthalic acid (13, 4  
 240 g, 18 mmol) in THF (100 mL) was added dropwise under ice-bath condition to a solution of lithium  
 241 aluminium hydride (1.5 g, 38mmol) in THF (100 mL). The reaction was stirred for 1 h at 0 °C,  
 242 after which the reaction was heated at 60 °C for 24 h. The reaction was monitored by TLC. Upon  
 243 completion, the reaction mixture was cooled to 0 °C and quenched with methanol and water. The  
 244 quenched reaction was filtered through celite and washed with EtOAc (100 mL). The combined  
 245 organic solvent was removed under reduced pressure and was extracted with EtOAc (3 × 100 mL),  
 246 dried over MgSO<sub>4</sub> and concentrated to give the required diol (5-(tert-butyl)-1,3-  
 247 phenylene)dimethanol (14, 3.2 g, 94%). <sup>1</sup>H NMR (CDCl<sub>3</sub>): δ 7.32 (s, 2H), 7.19 (s, 1H), 4.69 (s,  
 248 4H), 1.33 (s, 6H). <sup>13</sup>C NMR (CDCl<sub>3</sub>): δ 152.2, 141.1, 123.6, 123.1, 65.7, 34.9, 31.5. HRMS calcd  
 249 for C<sub>12</sub>H<sub>17</sub>O[M- H<sub>2</sub>O]<sup>+</sup>: 177.1274, found 177.1274.

250 *Synthesis of 1, 3-bis (4-cyano-phenoxy methyl)- 5-(tert-butyl)benzene (16).* PBr<sub>3</sub> (2.5 mL, 26 mmol)  
 251 was added dropwise to a solution of diol (5-(tert-butyl)-1,3-phenylene)dimethanol (14, 2.3 g,  
 252 11.8mmol) in DCM at 0°C. The reaction mixture was stirred at room temperature for 4 h and then  
 253 quenched with ice water. The solution was extracted with CH<sub>2</sub>Cl<sub>2</sub> (3 × 100 mL), dried over MgSO<sub>4</sub>

254 and concentrated to give the required dibromo compound (1,3-bis(bromomethyl)-5-(tert-  
 255 butyl)benzene) as a white solid (**15**, 3.4 g, 90%). Reaction of 1,3-bis(bromomethyl)-5-(tert-  
 256 butyl)benzene (**15**, 1.6 g, 5 mmol) and 4-hydroxybenzonitrile (**2**, 1.19 g, 10 mmol) yielded dinitrile  
 257 compound as white solid (**16**, 1.54 g, 78%) using method A. <sup>1</sup>H NMR (DMSO-d<sub>6</sub>): δ 7.79 -7.78  
 258 (m, 4H), 7.48 (s, 2H), 7.36 (s, 1H), 7.20 - 7.18 (m, 4H), 5.20 (s, 4H), 1.29 (s, 9H). <sup>13</sup>C NMR  
 259 (CDCl<sub>3</sub>): δ 161.8, 151.3, 136.1, 134.2, 124.8, 119.1, 115.9, 103.0, 69.9, 34.5, 31.1. HRMS calcd  
 260 for C<sub>26</sub>H<sub>25</sub>N<sub>2</sub>O<sub>2</sub>[M+H]<sup>+</sup>: 397.1911, found 397.1912.

261 *Synthesis of 4,4'-(((5-(tert-butyl)-1,3-phenylene)bis(methylene))bis(oxy))dibenzimidamide*  
 262 *dihydrochloride (MD-105)*. 1, 3-bis (4-cyano-phenoxy methyl)- 5-(tert-butyl)benzene (**16**, 0.370  
 263 g, 1 mmol) was converted to yielded 4,4'-(((5-(tert-butyl)-1,3-  
 264 phenylene)bis(methylene))bis(oxy))dibenzimidamide dihydrochloride as brown solid following  
 265 method B (**MD-105**, 0.35 g, 70%). <sup>1</sup>H NMR (DMSO-d<sub>6</sub>): δ 9.42 (s, 4H), 9.21 (s, 4H), 7.94 (d, *J* =  
 266 8.4 Hz, 4H), 7.49 (s, 2H), 7.39 (s, 1H), 7.23 (d, *J* = 8.4 Hz, 4H), 5.23 (s, 4H), 1.28 (s, 9H). <sup>13</sup>C  
 267 NMR (DMSO-d<sub>6</sub>): δ 165.7, 163.5, 152.5, 137.0, 131.0, 125.6, 120.3, 116.1, 70.7, 35.2, 31.8.  
 268 HRMS calcd for C<sub>26</sub>H<sub>31</sub>N<sub>4</sub>O<sub>2</sub>[M+H]<sup>+</sup>: 431.2442, found 431.2425.

### 269 **Synthesis of MD-106**

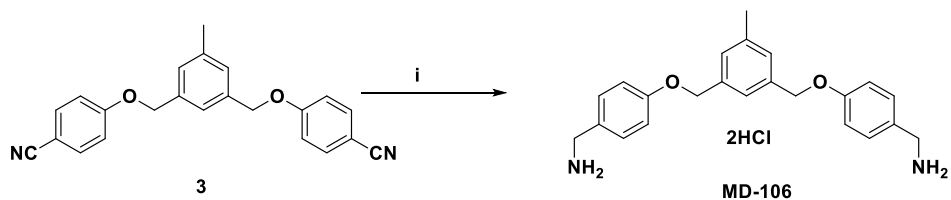

(i) LiAlH<sub>4</sub>, THF, 0°C - rt, 16 h.

271 *Synthesis of (((5-methyl-1,3-phenylene)bis(methylene))bis(oxy))bis(4,1-*  
 272 *phenylene))dimethanamine dihydrochloride (MD-106)*. A solution of 1, 3-bis (4-cyano-phenoxy

273 methyl-5-methyl-benzene (**3**, 1.0 g, 2.8 mmol) in THF (20 mL) was added dropwise to a  
 274 suspension of LiAlH<sub>4</sub> (0.32 g, 7.4 mmol) in THF under argon gas at 0 °C and the mixture was  
 275 stirred at room temperature for 16 h. The reaction was quenched with addition of H<sub>2</sub>O (5 mL) at 0  
 276 °C followed by addition of 16% NaOH solution (2 mL). The mixture was stirred at room  
 277 temperature for around 2 hours after which it was filtered through celite. The solution was then  
 278 concentrated *in vacuo* to obtain the free diamine. The product residue was then dissolved in ethanol  
 279 followed by addition of HCl in ethanol (2 mL) for salt formation. The reaction mixture was  
 280 evaporated *in vacuo* followed by ether precipitation to obtain the product as a green solid. (**MD-**  
 281 **106**, 1.0 g, 87%). <sup>1</sup>H NMR (DMSO-d<sub>6</sub>): δ 8.45 (s, 6H), 7.43 (d, *J* = 8.4 Hz, 4H), 7.32 (s, 1H), 7.22  
 282 (s, 2H), 7.03 (d, *J* = 8.4 Hz, 4H), 5.09 (s, 4H), 2.32 (s, 3H). <sup>13</sup>C NMR (DMSO-d<sub>6</sub>): δ 158.4, 137.9,  
 283 137.2, 130.5, 127.8, 126.2, 124.3, 114.8, 69.2, 41.6, 21.0. HRMS calcd for C<sub>23</sub>H<sub>27</sub>N<sub>2</sub>O<sub>2</sub> [M+H]<sup>+</sup>:  
 284 363.2079, found 363.2067.

## 285 Synthesis of MD-108

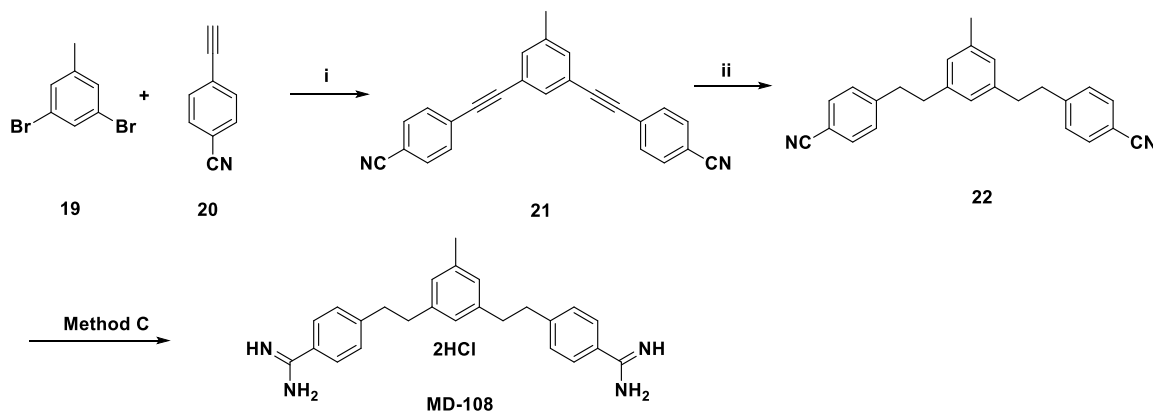

286 (i) 3 mol% Pd(PPh<sub>3</sub>)<sub>4</sub>, 6 mol% sodium ascorbate, 1 mol% CuSO<sub>4</sub>, 1:1 Et<sub>3</sub>N; DMSO (ii) H<sub>2</sub>,  
 Pd/C, MeOH, overnight.

287 Synthesis of 4,4'-((5-methyl-1,3-phenylene)bis(ethyne-2,1-diyl))dibenzonitrile (**21**). 3,5-  
 288 dibromotoluene (**19**, 0.98 g, 3.9 mmol) was dissolved with 1:1 DMF-Et<sub>3</sub>N (6 mL). To this solution,

289 3 mole% Pd(PPh<sub>3</sub>)<sub>4</sub> and 4-ethynylbenzonitrile (1 g, 7.8 mmol) were added and the mixture was  
290 stirred for 5 minutes. Further, 6 mol% sodium ascorbate solution, 1 mol% CuSO<sub>4</sub> solution in DMF  
291 were added to the reaction mixture and stirred for 4 h at 80 °C.<sup>2</sup> The reaction mixture was extracted  
292 with ethyl acetate followed by ammonium chloride and brine wash. The combined organic layer  
293 was dried over anhydrous Na<sub>2</sub>SO<sub>4</sub> and then concentrated in vacuo. The product was purified using  
294 column chromatography and obtained using 5:1 hexane: ethyl acetate system as a white solid (**21**,  
295 0.67 g, 50%).<sup>2</sup> <sup>1</sup>H NMR (CDCl<sub>3</sub>): δ 7.66 - 7.59 (m, 8H), 7.55 (s, 1H), 7.38 (s, 2H), 2.38 (s, 3H).  
296 <sup>13</sup>C NMR (CDCl<sub>3</sub>): δ 38.9, 133.1, 132.3, 132.2, 128.1, 122.8, 118.6, 111.9, 92.9, 88.3, 21.2.  
297 HRMS-calcd for C<sub>25</sub>H<sub>14</sub>N<sub>2</sub>Na[M+Na]<sup>+</sup>: 365.1055 found 365.1068.

298 *Synthesis of 4,4'-((5-methyl-1,3-phenylene)bis(ethane-2,1-diyl))dibenzonitrile (22)*. To 10% Pd/C  
299 in THF (30 mL) under argon gas was added 4,4'-((5-methyl-1,3-phenylene)bis(ethyne-2,1-  
300 diyl))dibenzonitrile (**21**, 0.5 g, 1.46 mmol). The argon gas was exchanged for H<sub>2</sub> gas and the  
301 reaction mixture was stirred overnight. The reaction mixture was quenched with CH<sub>2</sub>Cl<sub>2</sub> and  
302 filtered through celite. Extraction was carried out with CH<sub>2</sub>Cl<sub>2</sub> followed by washing with H<sub>2</sub>O. The  
303 combined organic layer was dried over anhydrous Na<sub>2</sub>SO<sub>4</sub> and then concentrated under vacuum to  
304 give the product as a pale-yellow solid (**22**, 0.45 g, 87.6%). <sup>1</sup>H NMR (CDCl<sub>3</sub>): δ 7.56 (d, *J* = 8.4  
305 Hz, 4H), 7.24 (d, *J* = 8.4 Hz, 4H), 6.81 (s, 2H), 6.67 (s, 1H), 2.95 - 2.90 (m, 4H), 2.85 - 2.81 (m,  
306 4H), 2.29 (s, 3H). <sup>13</sup>C NMR (CDCl<sub>3</sub>): δ 147.5, 141.0, 138.4, 132.3, 129.4, 127.3, 125.8, 119.2,  
307 110.0, 38.1, 37.3, 21.5. HRMS calcd for C<sub>25</sub>H<sub>23</sub>N<sub>2</sub>[M+H]<sup>+</sup>: 351.1856 found 351.1846.

308 *Synthesis of 4,4'-((5-methyl-1,3-phenylene)bis(ethane-2,1-diyl))dibenzimidamide dihydrochloride*  
309 (**MD-108**). Dinitrile compound (**21**, 0.35 g, 1 mmol) was converted to 4,4'-((5-methyl-1,3-  
310 phenylene)bis(ethane-2,1-diyl))dibenzimidamide dihydrochloride (**MD-108**) as white solid  
311 following method B (**MD-108**, 0.32 g, 70%). <sup>1</sup>H NMR (DMSO-d<sub>6</sub>): δ 9.34 (s, 4H), 9.12 (s, 4H),

312 7.78 (d,  $J = 8.4$  Hz, 4H), 7.49 (d,  $J = 8.4$  Hz, 4H), 6.94 (s, 1H), 6.90 (s, 2H), 2.98 - 2.94 (m, 4H),  
313 2.85 - 2.81 (m, 4H), 2.24 (s, 3H).  $^{13}\text{C}$  NMR (DMSO- $d_6$ ):  $\delta$  165.5, 148.4, 141.0, 137.3, 129.1, 128.2,  
314 126.9, 125.6, 125.5, 36.9, 36.6, 21.1. HRMS calcd for  $\text{C}_{25}\text{H}_{30}\text{N}_4$   $[\text{M}+2\text{H}]^{2+}/2$ : 193.1230, found  
315 193.1222.

### 316 Synthesis of MD-109

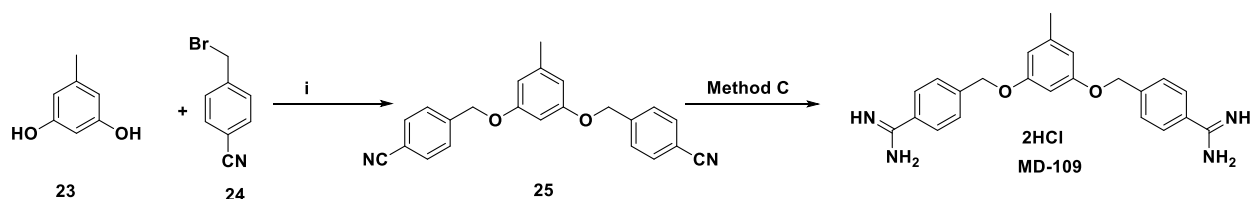

317 i)  $\text{K}_2\text{CO}_3$ , DMF, rt, overnight.

318 *Synthesis of 4,4'-(((5-methyl-1,3-phenylene)bis(oxy))bis(methylene))dibenzonitrile (25).* A  
319 mixture of orcinol (**23**, 0.5 g, 4.1 mmol), 4-cyanobenzyl bromide (**24**, 1.65 g, 8.4 mmol) and  
320 anhydrous  $\text{K}_2\text{CO}_3$  (1.66 g, 12 mmol) in 10 mL DMF was stirred at room temperature overnight.  
321 Then the reaction mixture was diluted with ice water (70 mL) and stirred for 30 min. The yellow  
322 precipitate was filtered, washed with water, and dried in air. Then the yellow solid was dissolved  
323 in a DCM (100 mL), dried over anhydrous  $\text{MgSO}_4$ , filtered and concentrated with rotavapor. The  
324 crude product was triturated with hexane and the precipitate was filtered, which was then dried *in*  
325 *vacuo* to yield 4,4'-(((5-methyl-1,3-phenylene)bis(oxy))bis(methylene))dibenzonitrile as a yellow  
326 solid (**25**, 0.97 g, 66.5%).  $^1\text{H}$  NMR ( $\text{CDCl}_3$ ):  $\delta$  7.68 (d,  $J = 8.4$  Hz, 4H), 7.53 (d,  $J = 8.4$  Hz, 4H),  
327 6.43 (d,  $J = 2.0$  Hz, 2H), 6.39 (t,  $J = 2.0$  Hz, 1H), 5.08 (s, 4H), 2.30 (s, 3H).  $^{13}\text{C}$  NMR ( $\text{CDCl}_3$ ):  $\delta$   
328 159.5, 142.5, 140.9, 132.5, 127.7, 118.8, 111.9, 108.7, 99.5, 69.0, 22.0. HRMS calcd for  
329  $\text{C}_{23}\text{H}_{18}\text{N}_2\text{O}_2\text{Na}$   $[\text{M}+\text{Na}]^+$ : 377.1266, found 377.1283.

330 Synthesize of 4,4'-(((5-methyl-1,3-phenylene)bis(oxy))bis(methylene))dibenzimidamide  
331 dihydrochloride (**MD-109**). Dinitrile (**25**, 0.33 g, 0.93 mmol) was converted to 4,4'-(((5-methyl-  
332 1,3-phenylene)bis(oxy))bis(methylene))dibenzimidamide dihydrochloride as white solid  
333 following method C (**MD-109**, 0.3 g, 75%). <sup>1</sup>H NMR (DMSO-d<sub>6</sub>): δ 9.45 (s, 4H), 9.25 (s, 4H), 7.86  
334 (d, *J* = 7.6 Hz, 4H), 7.64 (d, *J* = 7.6 Hz, 4H), 6.50 (s, 1H), 6.48 (s, 2H), 5.20 (s, 4H), 2.23 (s, 3H).  
335 <sup>13</sup>C NMR (DMSO-d<sub>6</sub>): δ 165.5, 159.1, 143.4, 140.0, 128.4, 127.6, 127.3, 108.3, 99.3, 68.3, 21.5.  
336 HRMS calcd for C<sub>23</sub>H<sub>25</sub>N<sub>4</sub>O<sub>2</sub> [M+H]<sup>+</sup>: 389.1978, found 389.1960.

### 337 Synthesis of MD-112

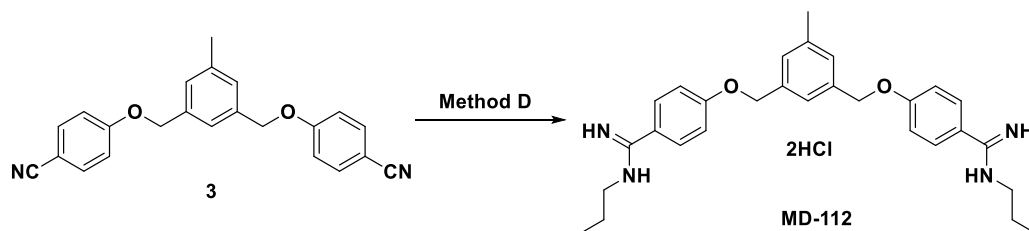

339 Synthesis of 4,4'-(((5-methyl-1,3-phenylene)bis(oxy))bis(methylene))bis(N-propylbenzimidamide)  
340 dihydrochloride (**MD-112**). Dinitrile (**3**, 0.35 g, 0.98 mmol) was converted to 4,4'-(((5-methyl-  
341 1,3-phenylene)bis(oxy))bis(methylene))bis(N-propylbenzimidamide) dihydrochloride (**MD-112**)  
342 by the reaction with *n*-propylamine (0.14 g, 2.45 mmol) in ethanol (10 mL) at 49 °C for 24 h as  
343 white solid following method D (0.37 g, 70%). <sup>1</sup>H NMR (DMSO-d<sub>6</sub>): δ 9.90 (s, 2H), 9.53 (s, 2H),  
344 9.18 (s, 2H), 7.79 (d, *J* = 8.4 Hz, 4H), 7.63 (d, *J* = 8.4 Hz, 4H), 6.50 – 6.48 (m, 3H), 5.19 (s, 4H),  
345 3.41 - 3.36 (m, 2H), 2.23 (s, 3H), 1.68-1.63 (m, 4H), 0.95 (t, *J* = 7.2 Hz, 6H). <sup>13</sup>C NMR (DMSO-  
346 d<sub>6</sub>): δ 162.5, 159.1, 142.7, 140.2, 128.5, 128.3, 127.6, 108.3, 99.7, 68.3, 44.2, 21.5, 20.9, 11.2.  
347 HRMS- calcd for C<sub>29</sub>H<sub>37</sub>N<sub>4</sub>O<sub>2</sub> [M+H]<sup>+</sup>: 473.2917, found 473.2940.

### 348 Synthesis of MD-113



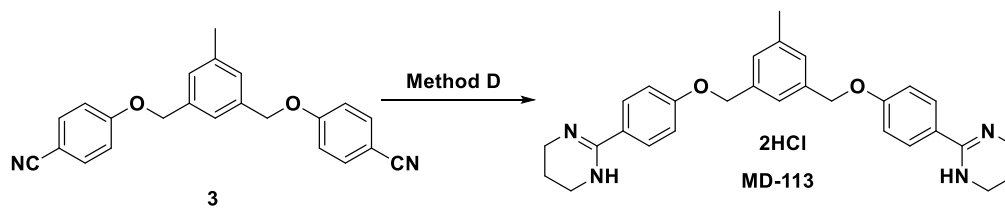

349  
 350 *Synthesis of 2,2'-(((5-methyl-1,3-phenylene)bis(methylene))bis(oxy))bis(4,1-*  
 351 *phenylene))bis(1,4,5,6-tetrahydropyrimidine) dihydrochloride (MD-113).* Dinitrile (**3**, 0.4 g, 1.12  
 352 mmol) was converted to 2,2'-(((5-methyl-1,3-phenylene)bis(methylene))bis(oxy))bis(4,1-  
 353 phenylene))bis(1,4,5,6-tetrahydropyrimidine) dihydrochloride (**MD-113**) by the reaction with  
 354 1,3-diaminopropane (0.25 g, 3.4 mmol) in ethanol (10 mL) at 140 °C as white solid following  
 355 method D (**MD-113**, 0.48 g, 75%). <sup>1</sup>H NMR (DMSO-d<sub>6</sub>): δ 10.23 (s, 4H), 7.82 (d, *J* = 8.0 Hz,  
 356 4H), 7.63 (d, *J* = 8.0 Hz, 4H), 6.51 (s, 1H), 6.48 (s, 2H), 5.19 (s, 4H), 3.48 – 3.37 (m, 8H), 2.23 (s,  
 357 3H), 1.98-1.95 (m, 4H). <sup>13</sup>C NMR (DMSO-d<sub>6</sub>): δ 159.1, 158.5, 142.6, 139.9, 128.0, 127.6, 127.6,  
 358 108.3, 99.2, 68.3, 38.7, 21.4, 17.7. HRMS calcd for C<sub>29</sub>H<sub>33</sub>N<sub>4</sub>O<sub>2</sub> [M+H]<sup>+</sup>: 469.2604, found  
 359 469.2617.

### 360 Synthesis of BW-MD-115

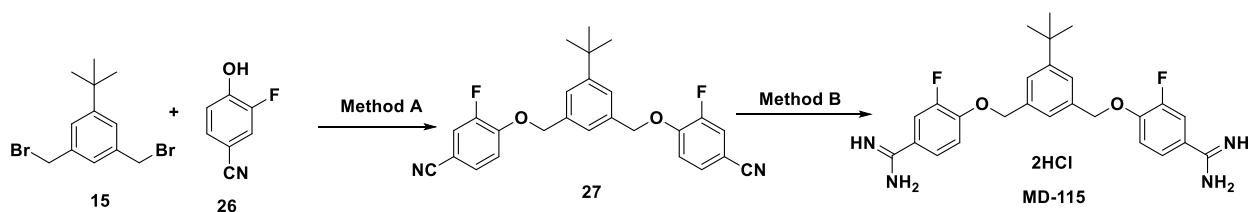

361  
 362 *Synthesis of 4,4'-(((5-(tert-butyl)-1,3-phenylene)bis(methylene))bis(oxy))bis(3-fluorobenzonitrile)*  
 363 *(27).* Reaction of 1,3-bis(bromomethyl)-5-(tert-butyl)benzene (**15**, 1.5g, 4.7mmol) and 2-fluoro-  
 364 4-hydroxybenzonitrile (**26**, 1.3 g, 9.4 mmol) yielded 4,4'-(((5-(tert-butyl)-1,3-  
 365 phenylene)bis(methylene))bis(oxy))bis(3-fluorobenzonitrile) as white solid (**27**, 1.52 g, 75%)  
 366 using method A. <sup>1</sup>H NMR (DMSO-d<sub>6</sub>): δ 7.85 (dd, *J* = 11.2, 1.6 Hz, 2H), 7.68-7.66 (m, 2H), 7.50

367 (s, 2H), 7.44 (t,  $J = 8.8$  Hz, 2H), 7.36 (s, 1H), 5.29 (s, 4H), 1.29 (s, 9H).  $^{13}\text{C}$  NMR (DMSO- $d_6$ ):  $\delta$   
 368 153.4, 151.8 (d,  $J_{\text{C-F}} = 186$  Hz), 151.0, 135.6, 129.7 (d,  $J_{\text{C-F}} = 4$  Hz), 125.0, 123.9, 120.0 (d,  $J_{\text{C-F}}$   
 369 = 21 Hz), 118.0 (d,  $J_{\text{C-F}} = 3$  Hz), 115.4 (d,  $J_{\text{C-F}} = 3$  Hz), 104.6 (d,  $J_{\text{C-F}} = 9$  Hz), 71.5, 35.0, 31.4.  
 370 HRMS calcd for  $\text{C}_{26}\text{H}_{22}\text{F}_2\text{N}_2\text{O}_2\text{Na}$  [ $\text{M}+\text{Na}$ ] $^+$ : 455.1547, found 455.1541.

371 *Synthesis of 4,4'-(((5-(tert-butyl)-1,3-phenylene)bis(methylene))bis(oxy))bis(3-*  
 372 *fluorobenzimidamide) dihydrochloride (MD-115).* Dinitrile (**27**, 0.35 g, 0.8 mmol) was converted  
 373 to 4,4'-(((5-(tert-butyl)-1,3-phenylene)bis(methylene))bis(oxy))bis(3-fluorobenzimidamide)  
 374 dihydrochloride (**MD-115**) as brown solid following method B (0.30 g, 70.1%).  $^1\text{H}$  NMR (DMSO-  
 375  $d_6$ ):  $\delta$  9.49 (s, 4H), 9.26 (s, 4H), 7.90 (dd,  $J = 12.4, 2.4$  Hz, 2H), 7.81-7.79 (m, 2H), 7.52-7.50 (m,  
 376 4H), 7.39 (s, 1H), 5.31 (s, 4H), 1.28 (s, 9H).  $^{13}\text{C}$  NMR (DMSO- $d_6$ ):  $\delta$  164.0, 152.3, 151.0 (d,  $J_{\text{C-F}}$   
 377 = 11 Hz), 150.8 (d,  $J_{\text{C-F}} = 177$  Hz), 136.0, 126.0 (d,  $J_{\text{C-F}} = 3$  Hz), 125.2, 124.9, 120.0 (d,  $J_{\text{C-F}} = 7$   
 378 Hz), 116.3 (d,  $J_{\text{C-F}} = 20$  Hz), 115.3, 70.9, 34.6, 31.2. HRMS calcd for  $\text{C}_{26}\text{H}_{29}\text{F}_2\text{N}_4\text{O}_2$  [ $\text{M}+\text{H}$ ] $^+$ :  
 379 467.2272, found 467.2271.

### 380 Synthesis of MD-116

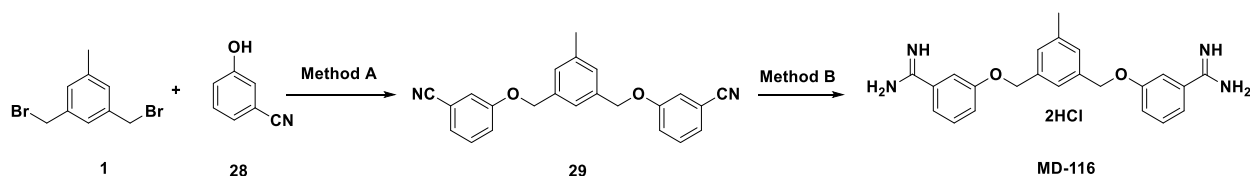

382 *Synthesis of 3,3'-(((5-methyl-1,3-phenylene)bis(methylene))bis(oxy))dibenzonitrile (29).*  
 383 Reaction of 1,3-bis (bromomethyl)-5-methylbenzene (**1**, 2.13 g, 7.7 mmol) and 3-cyanophenol (**28**,  
 384 2.05 g, 17 mmol) yielded 3,3'-(((5-methyl-1,3-phenylene)bis(methylene))bis(oxy))dibenzonitrile  
 385 as white solid (**29**, 2.6 g, 91%) using method A.  $^1\text{H}$  NMR ( $\text{CDCl}_3$ ):  $\delta$  7.38-7.36 (m, 2H), 7.27-7.25  
 386 (m, 3H), 7.22-7.19 (m, 6H), 5.06 (s, 4H), 2.41 (s, 3H).  $^{13}\text{C}$  NMR ( $\text{CDCl}_3$ ):  $\delta$  158.8, 139.3, 136.6,

387 130.6, 128.3, 125.0, 123.6, 120.2, 118.8, 117.9, 113.4, 70.2, 21.5. HRMS calcd for  
388  $C_{23}H_{18}N_2O_2Na[M+Na]^+$ : 377.1266, found 377.1250.

389 *Synthesis of 3,3'-(((5-methyl-1,3-phenylene)bis(methylene))bis(oxy))dibenzimidamide*  
390 *dihydrochloride (MD-116)*. Dinitrile (**29**, 0.32 g, 0.9 mmol) was converted to 3,3'-(((5-methyl-  
391 1,3-phenylene)bis(methylene))bis(oxy))dibenzimidamide dihydrochloride (**MD-116**) as white  
392 solid using method B (0.32 g, 76%).  $^1H$  NMR (DMSO- $d_6$ ):  $\delta$  9.40 (s, 4H), 9.07 (s, 4H), 7.53 (t,  $J$   
393 = 8.0 Hz, 2H), 7.47 (s, 2H), 7.41-7.34 (m, 5H), 7.26 (s, 2H), 5.16 (s, 4H), 2.33 (s, 3H).  $^{13}C$  NMR  
394 (DMSO- $d_6$ ):  $\delta$  165.6, 158.7, 138.5, 137.0, 130.8, 129.5, 128.5, 124.6, 120.7, 120.5, 114.5, 69.9,  
395 21.2. HRMS calcd for  $C_{23}H_{25}N_4O_2 [M+H]^+$ : 389.1978, found 389.1980.

### 396 **Synthesis of MD-117**

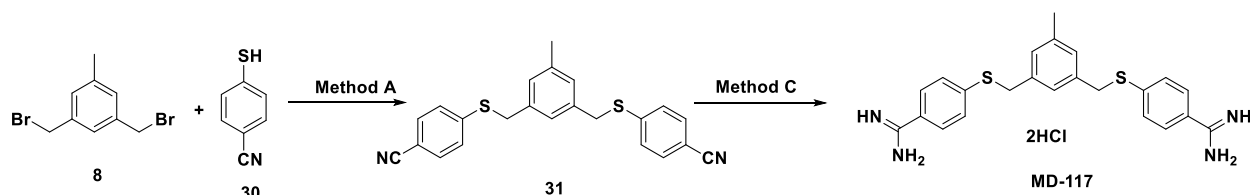

398 *Synthesis of 4,4'-(((5-methyl-1,3-phenylene)bis(methylene))bis(sulfanediy))dibenzonitrile (31)*.  
399 Reaction of 1,3-bis (bromomethyl)-5-methylbenzene (**8**, 0.93 g, 3.3 mmol) and 4-  
400 mercaptobenzonitrile (**30**, 1.0 g, 7.3 mmol) yielded 4,4'-(((5-methyl-1,3-  
401 phenylene)bis(methylene))bis(sulfanediy))dibenzonitrile as white solid (1.12 g, 85%), using  
402 method A.  $^1H$  NMR (CDCl $_3$ ):  $\delta$  7.50 (d,  $J$  = 8.4 Hz, 4H), 7.28 (d,  $J$  = 8.4 Hz, 4H), 7.14 (s, 1H),  
403 7.08 (s, 2H), 4.13 (s, 4H), 2.32 (s, 3H).  $^{13}C$  NMR (DMSO- $d_6$ ):  $\delta$  144.3, 139.0, 136.2, 132.1, 128.9,  
404 127.1, 126.1, 118.7, 108.4, 36.7, 21.2. HRMS calcd for  $C_{23}H_{19}N_2S_2 [M+H]^+$ : 387.0984, found  
405 387.1003.

406 *Synthesis of 4,4'-(((5-methyl-1,3-phenylene)bis(methylene))bis(sulfanediyl))dibenzimidamide*  
 407 *dihydrochloride (MD-117)*. Dinitrile (**31**, 0.30 g, 0.74 mmol) was converted to 4,4'-(((5-methyl-  
 408 1,3-phenylene)bis(methylene))bis(sulfanediyl))dibenzimidamide dihydrochloride (**MD-117**) as  
 409 green solid following method C (**MD-117**, 0.19 g, 50%). <sup>1</sup>H NMR (DMSO-d<sub>6</sub>): δ 9.30 (s, 4H),  
 410 9.03 (s, 4H), 7.74 (d, *J* = 8.4 Hz, 4H), 7.51 (d, *J* = 8.4 Hz, 4H), 7.31 (s, 1H), 7.16 (s, 2H), 4.33  
 411 (s, 4H), 2.26 (s, 3H). <sup>13</sup>C NMR (DMSO-d<sub>6</sub>): δ 164.9, 144.8, 138.1, 136.8, 128.6, 128.5, 126.5,  
 412 126.3, 124.1, 35.0, 20.9. HRMS calcd for C<sub>23</sub>H<sub>25</sub>N<sub>4</sub>S<sub>2</sub> [M+H]<sup>+</sup>: 421.1521, found 421.1532.

### 413 **Synthesis of MD-120**

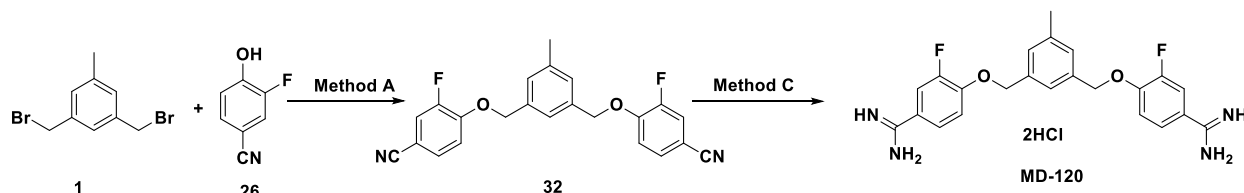

415 *Synthesis of 4,4'-(((5-methyl-1,3-phenylene)bis(methylene))bis(oxy))bis(3-fluorobenzonitrile) (32)*.  
 416 Reaction of 1,3-bis (bromomethyl)-5-methylbenzene (**1**, 0.99 g, 3.6 mmol) and 3-fluoro-4-  
 417 hydroxybenzotrile (**26**, 1.1 g, 7.9 mmol) yielded 4,4'-(((5-methyl-1,3-  
 418 phenylene)bis(methylene))bis(oxy))bis(3-fluorobenzonitrile) as white solid (**32**, 1.12 g, 80%),  
 419 using method A. <sup>1</sup>H NMR (CDCl<sub>3</sub>): δ 7.40 - 7.37 (m, 4H), 7.28 (s, 1H), 7.23 (s, 2H), 7.04 (t, *J* =  
 420 8.4 Hz, 2H), 5.17 (s, 4H), 2.40 (s, 3H). <sup>13</sup>C NMR (CDCl<sub>3</sub>): δ 152.2 (d, *J*<sub>C-F</sub> = 242 Hz), 150.9 (d, *J*<sub>C-</sub>  
 421 <sub>F</sub> = 4 Hz), 139.5, 135.9, 129.7 (d, *J*<sub>C-F</sub> = 4 Hz), 128.5, 123.6, 120.0 (d, *J*<sub>C-F</sub> = 21 Hz), 118.0 (d, *J*<sub>C-</sub>  
 422 <sub>F</sub> = 2 Hz), 115.3 (d, *J*<sub>C-F</sub> = 2 Hz), 104.6 (d, *J*<sub>C-F</sub> = 8 Hz), 71.1, 21.5. HRMS calcd for  
 423 C<sub>23</sub>H<sub>16</sub>F<sub>2</sub>N<sub>2</sub>O<sub>2</sub>Na [M+Na]<sup>+</sup>: 413.1078, found 413.1087.

424 *Synthesis of 4,4'-(((5-methyl-1,3-phenylene)bis(methylene))bis(oxy))bis(3-fluorobenzimidamide)*  
 425 *dihydrochloride (MD-120)*. Dinitrile (**32**, 0.35 g, 0.9 mmol) was converted to 4,4'-(((5-methyl-

426 1,3-phenylene)bis(methylene))bis(oxy))bis(3-fluorobenzimidamide) dihydrochloride as white  
 427 solid following method B (**MD-120**, 0.32 g, 72%). <sup>1</sup>H NMR (DMSO-d<sub>6</sub>): δ 9.42 (s, 4H), 9.24 (s,  
 428 4H), 7.90 (dd, *J* = 12.0, 2.0 Hz, 2H), 7.78-7.76 (m, 2H), 7.49 (t, *J* = 8.8 Hz, 2H), 7.38 (s, 1H), 7.29  
 429 (s, 2H), 5.30 (s, 4H), 2.35 (s, 3H). <sup>13</sup>C NMR (DMSO-d<sub>6</sub>): δ 163.8, 150.9 (d, *J*<sub>C-F</sub> = 244 Hz), 150.6  
 430 (d, *J*<sub>C-F</sub> = 10 Hz), 138.3, 136.2, 128.5, 125.8 (d, *J*<sub>C-F</sub> = 3 Hz), 124.5, 119.8 (d, *J*<sub>C-F</sub> = 7 Hz), 116.1  
 431 (d, *J*<sub>C-F</sub> = 21 Hz), 151.0, 70.3, 20.9. HRMS calcd for C<sub>23</sub>H<sub>23</sub>F<sub>2</sub>N<sub>4</sub>O<sub>2</sub> [M+H]<sup>+</sup>: 425.1789, found  
 432 425.1777.

### 433 Synthesis of MD-123

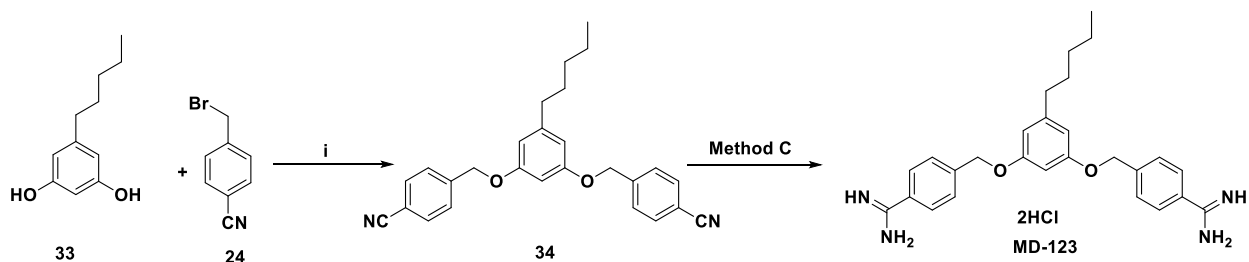

434 i) K<sub>2</sub>CO<sub>3</sub>, DMF, rt, overnight.

435 *Synthesis of 4,4'-(((5-butyl-1,3-phenylene)bis(oxy))bis(methylene))dibenzonitrile (34)*. A mixture  
 436 of olivetol (**33**, 1.4 g, 8.2 mmol), 4-cyanobenzyl bromide (**24**, 3.53 g, 18 mmol) and anhydrous  
 437 K<sub>2</sub>CO<sub>3</sub> (3.4 g, 24.6 mmol) in 100 mL DMF was stirred at room temperature overnight. Then the  
 438 reaction mixture was diluted with ice water (50 mL) and extracted with ethyl acetate (3 x 100 mL)  
 439 followed by water and brine wash. The combined organic layer is dried over anhydrous Na<sub>2</sub>SO<sub>4</sub>,  
 440 filtered, concentrated in vacuum to yield 4,4'-(((5-butyl-1,3-  
 441 phenylene)bis(oxy))bis(methylene))dibenzonitrile (**34**) as an orange solid (**34**, 3.2 g, 95.0%). <sup>1</sup>H  
 442 NMR (CDCl<sub>3</sub>): δ 7.67 (d, *J* = 8.4 Hz, 4H), 7.53 (d, *J* = 8.4 Hz, 4H), 6.44 (d, *J* = 2.0 Hz, 2H), 6.40  
 443 (t, *J* = 2.0 Hz, 1H), 5.09 (s, 4H), 2.56 – 2.52 (m, 2H), 1.60 - 1.57 (m, 2H), 1.33 - 1.27 (m, 4H),  
 444 0.89 (t, *J* = 7.2 Hz, 3H). <sup>13</sup>C NMR (CDCl<sub>3</sub>): δ 159.4, 146.0, 142.5, 132.5, 127.7, 118.8, 111.8,

445 108.0, 99.5, 69.0, 36.3, 31.5, 31.0, 22.6, 14.1. HRMS calcd for C<sub>27</sub>H<sub>26</sub>N<sub>2</sub>O<sub>2</sub>Na [M+Na]<sup>+</sup>: 433.1892,  
446 found 433.1873.

447 *Synthesis of 4,4'-((5-pentyl-1,3-phenylene)bis(ethane-2,1-diyl))dibenzimidamide dihydrochloride*  
448 **(MD-123)**. Dinitrile (**34**, 0.32 g, 0.78 mmol) was converted to 4,4'-((5-pentyl-1,3-  
449 phenylene)bis(ethane-2,1-diyl))dibenzimidamide dihydrochloride **(MD-123)** as white solid  
450 following method C (**MD-123**, 0.32 g, 80%). <sup>1</sup>H NMR (DMSO-d<sub>6</sub>): δ 9.47 (s, 4H), 9.28 (s, 4H),  
451 7.87 (d, *J* = 8.4 Hz, 4H), 7.65 (d, *J* = 8.4 Hz, 4H), 6.51 (t, *J* = 2.0 Hz, 1H), 6.48 (d, *J* = 2.0 Hz,  
452 2H), 5.20 (s, 4H), 2.50 - 2.46 (m, 2H), 1.55 - 1.52 (m, 2H), 1.29 - 1.20 (m, 4H), 0.84 (t, *J* = 6.8  
453 Hz, 3H). <sup>13</sup>C NMR (DMSO-d<sub>6</sub>): δ 165.4, 159.1, 145.0, 143.4, 128.3, 127.7, 127.3, 107.6, 99.6,  
454 68.3, 35.4, 30.9, 30.4, 22.0, 14.0. HRMS calcd for C<sub>27</sub>H<sub>33</sub>N<sub>4</sub>O<sub>2</sub>[M+H]<sup>+</sup>: 445.2604, found 445.2624.

#### 455 **Synthesis of MD-124**

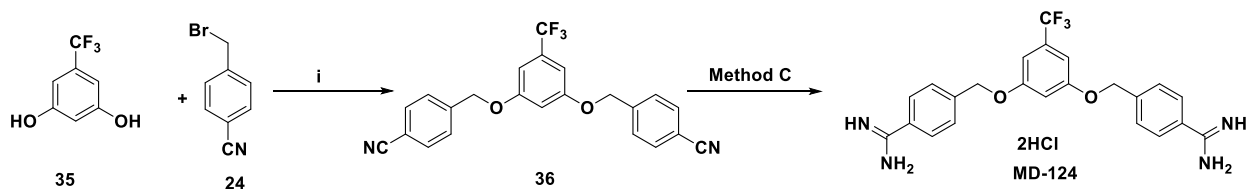

456 i) K<sub>2</sub>CO<sub>3</sub>, DMF, rt, overnight.

457 *Synthesis of 4,4'-(((5-(trifluoromethyl)-1,3-phenylene)bis(oxy))bis(methylene))dibenzimidamide*  
458 *dihydrochloride (MD-124)*. A mixture of 5-(Trifluoromethyl)-1,3-diol (**35**, 0.7 g, 4.2 mmol), 4-  
459 cyanobenzyl bromide (**24**, 1.80 g, 9.21 mmol) and anhydrous K<sub>2</sub>CO<sub>3</sub> (1.73 g, 12.6 mmol) in 20  
460 mL DMF was stirred at room temperature overnight. Then the reaction mixture was diluted with  
461 ice water (50 mL) and stirred for 30 min. The grey precipitate was filtered, washed with water,  
462 and dried in air. Then the yellow solid was dissolved in a dichloromethane (100 mL), dried over  
463 anhydrous Na<sub>2</sub>SO<sub>4</sub>, filtered, concentrated *in vacuum* to afford crude product. The crude product  
464 was triturated with hexane, filtered and dried *in vacuum* to yield dinitrile intermediate compound

465 **36** as a grey solid (1.48 g, 87.0%). Dinitrile (**36**, 0.35 g, 0.85 mmol) was converted to 4,4'-(((5-  
 466 (trifluoromethyl)-1,3-phenylene)bis(oxy))bis(methylene))dibenzimidamide dihydrochloride as  
 467 pale-yellow solid following method C (**MD-124**, 0.3 g, 70%). <sup>1</sup>H NMR (DMSO-d<sub>6</sub>): δ 9.43 (s, 4H),  
 468 9.20 (s, 4H), 7.87 (d, *J* = 8.4 Hz, 4H), 7.68 (d, *J* = 8.4 Hz, 4H), 7.03 (s, 1H), 6.99 (s, 2H), 5.32  
 469 (s, 4H). <sup>13</sup>C NMR (DMSO-d<sub>6</sub>): δ 165.4, 159.7, 142.5, 131.1 (q, *J*<sub>C-F</sub> = 32 Hz), 128.4, 127.8, 127.6  
 470 (q, *J*<sub>C-F</sub> = 240 Hz), 122.4, 105.9, 104.2, 68.9. HRMS calcd for C<sub>23</sub>H<sub>22</sub>F<sub>3</sub>N<sub>4</sub>O<sub>2</sub> [M+H]<sup>+</sup>: 443.1695,  
 471 found 443.1687.

## 472 Synthesis of MD-126

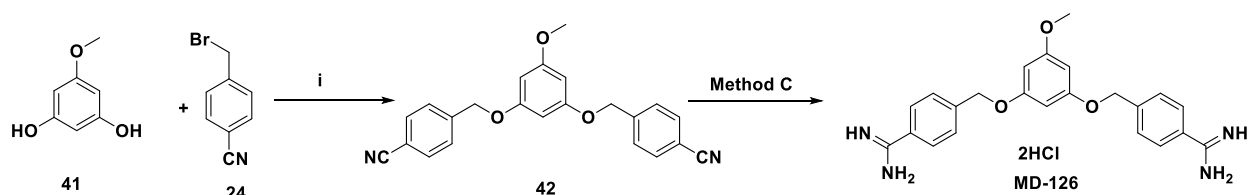

473 i) K<sub>2</sub>CO<sub>3</sub>, DMF, rt, overnight.

474 *Synthesis of 4,4'-(((5-methoxy-1,3-phenylene)bis(oxy))bis(methylene))dibenzonitrile (42).* A  
 475 mixture of 5-methoxyresorcinol (**41**, 1.22 g, 8.7 mmol), 4-cyanobenzyl bromide (**24**, 3.74 g, 18  
 476 mmol) and anhydrous K<sub>2</sub>CO<sub>3</sub> (3.6 g, 26.02 mmol) in 100 mL DMF was stirred at room temperature  
 477 overnight. Then the reaction mixture was diluted with ice water (50 mL) and extracted with ethyl  
 478 acetate (3 x 100 mL) followed by water and brine wash. The combined organic layer is dried over  
 479 anhydrous Na<sub>2</sub>SO<sub>4</sub>, filtered, concentrated with rotavapor and purified with column  
 480 chromatography using 5:1 hexane: EA as elution buffer to yield of 4,4'-(((5-methoxy-1,3-  
 481 phenylene)bis(oxy))bis(methylene))dibenzonitrile (**42**) as a white solid (**42**, 2.94 g, 71.0%). <sup>1</sup>H  
 482 NMR (CDCl<sub>3</sub>): δ 7.64 (d, *J* = 8.4 Hz, 4H), 7.51 (d, *J* = 8.4 Hz, 4H), 6.18 (t, *J* = 2.0 Hz, 1H), 6.16  
 483 (d, *J* = 2.0 Hz, 2H), 5.06 (s, 4H), 3.75 (s, 3H). <sup>13</sup>C NMR (CDCl<sub>3</sub>): δ 161.8, 160.3, 142.3, 132.6,

484 127.7, 118.8, 111.9, 94.7, 94.5, 69.11, 55.6. HRMS calcd for C<sub>23</sub>H<sub>18</sub>N<sub>2</sub>O<sub>3</sub>Na [M+Na]<sup>+</sup>: 393.1215,  
485 found 393.1201.

486 *Synthesis of 4,4'-(((5-methoxy-1,3-phenylene)bis(oxy))bis(methylene))dibenzimidamide*  
487 *dihydrochloride (MD-126)*. Dinitrile (**42**, 0.37 g, 0.99 mmol) was converted to 4,4'-(((5-methoxy-  
488 1,3-phenylene)bis(oxy))bis(methylene))dibenzimidamide dihydrochloride as yellow solid  
489 following method C (**MD-126**, 0.35 g, 75%) using ammonia gas. <sup>1</sup>H NMR (DMSO-d<sub>6</sub>): δ 9.44 (s,  
490 4H), 9.23 (s, 4H), 7.86 (d, *J* = 8.0 Hz, 4 H), 7.65 (d, *J* = 8.0 Hz, 4 H), 6.31 (s, 1H), 6.22 (s, 2H),  
491 5.21 (s, 4 H), 3.70 (s, 3 H). <sup>13</sup>C NMR (DMSO-d<sub>6</sub>): δ 165.4, 161.2, 159.8, 143.2, 128.3, 127.6, 94.7,  
492 94.1, 68.4, 55.3. HRMS calcd for C<sub>23</sub>H<sub>25</sub>N<sub>4</sub>O<sub>3</sub> [M+H]<sup>+</sup>: 405.1927, found 405.1923.

493

494



495

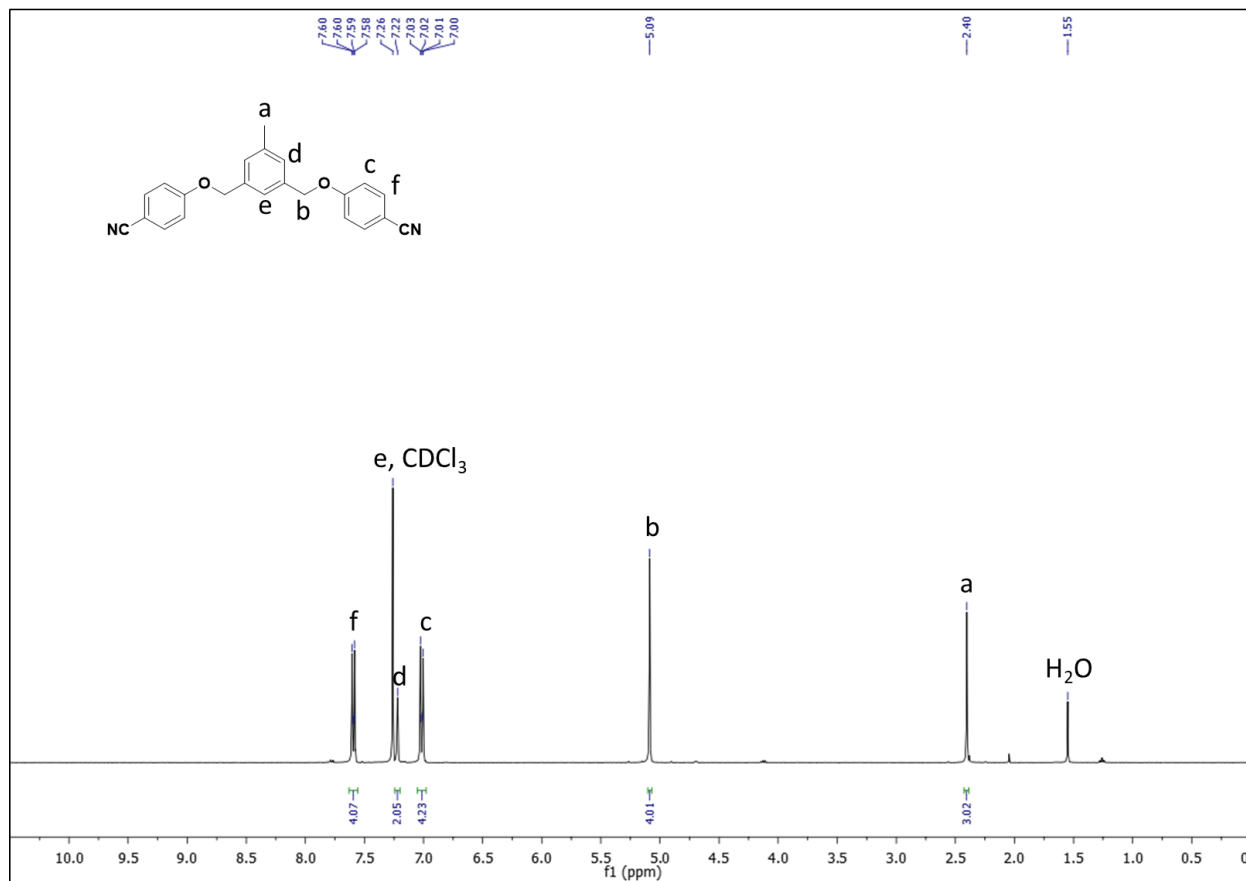

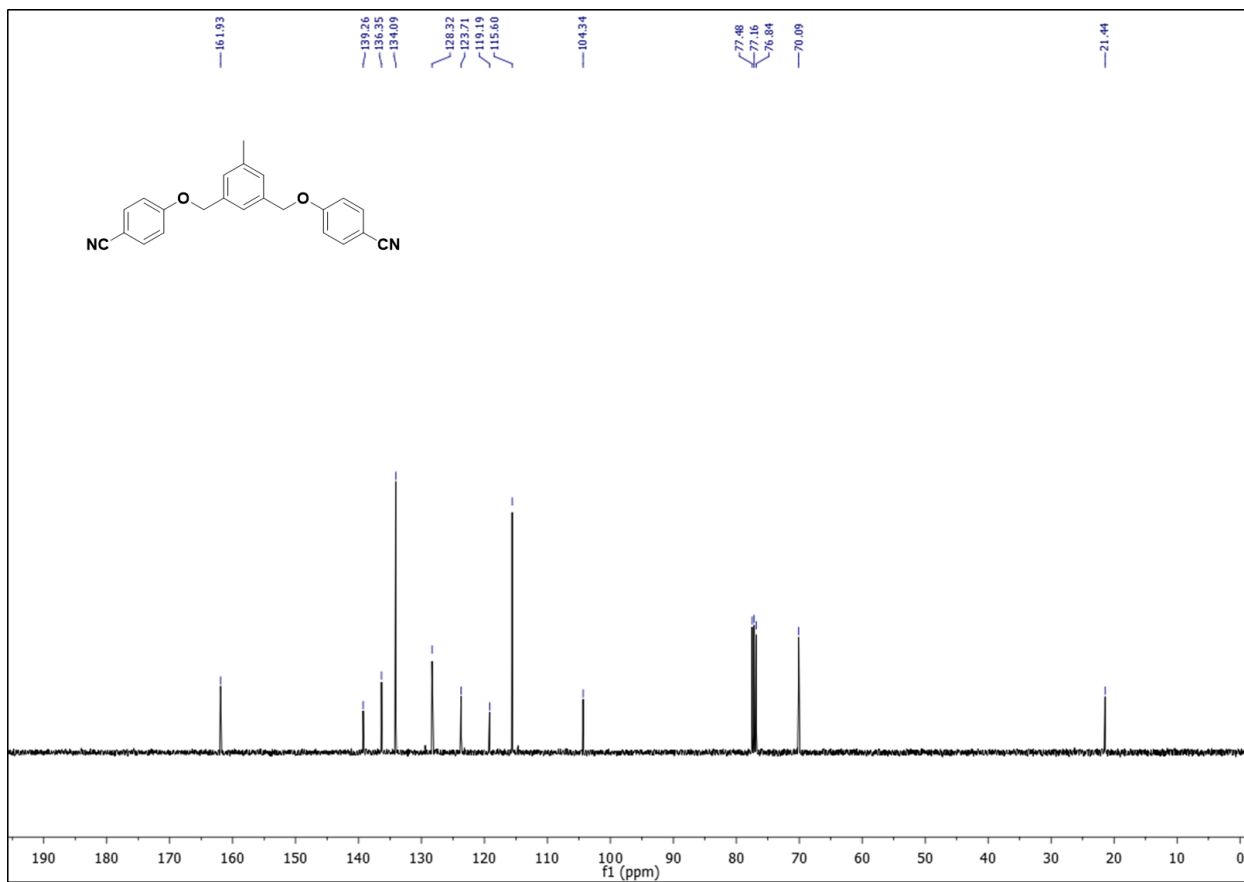

496

497

498

499

500

501

502

503

504

505

506

507

508

509

510

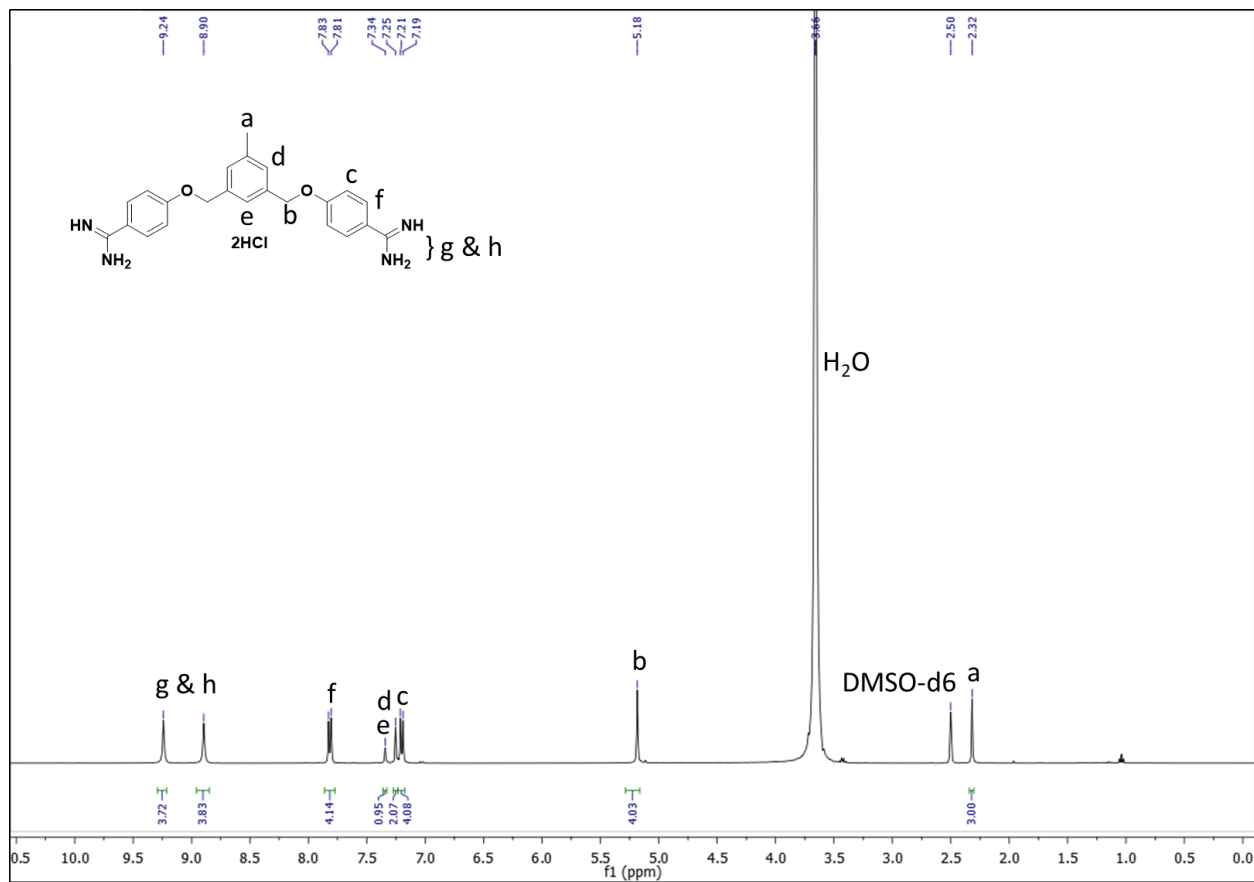

511

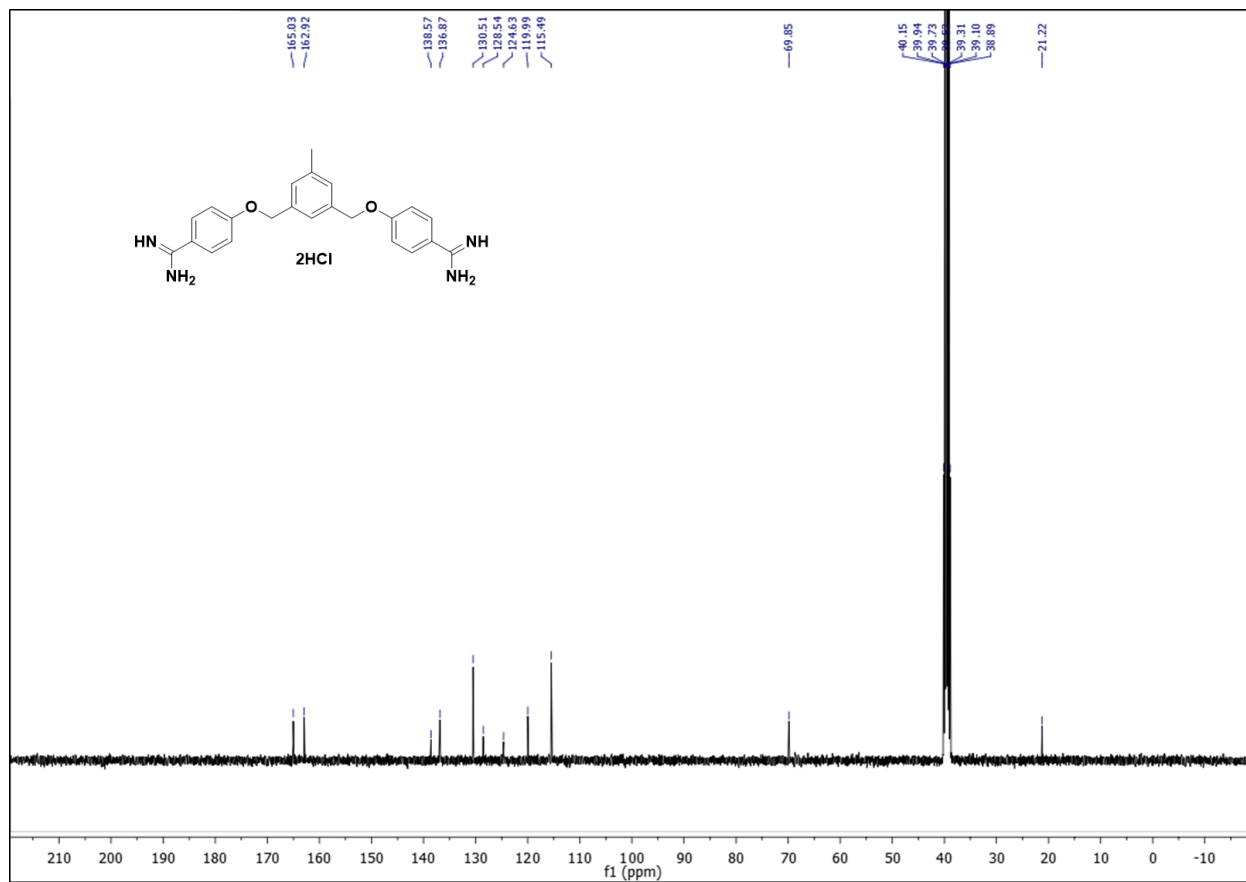

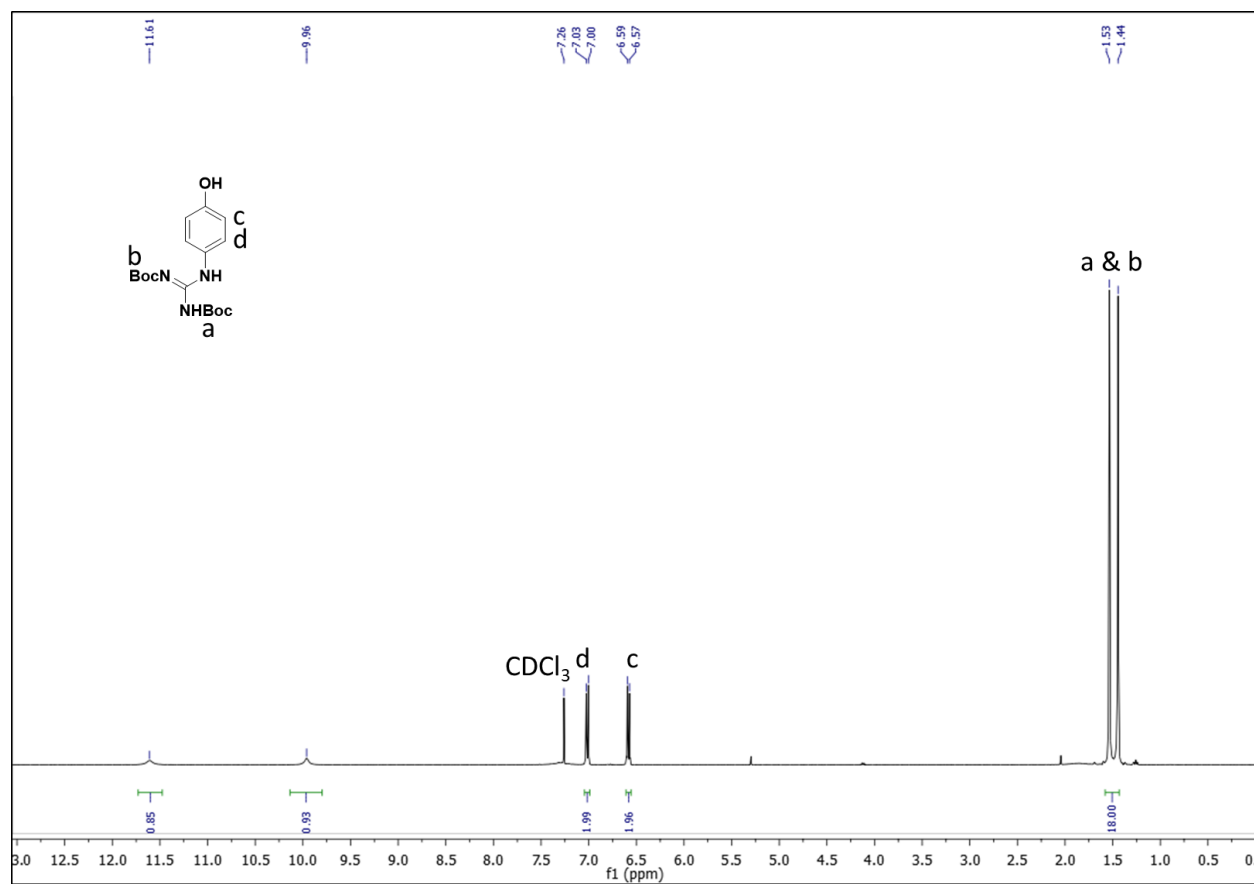

512

513

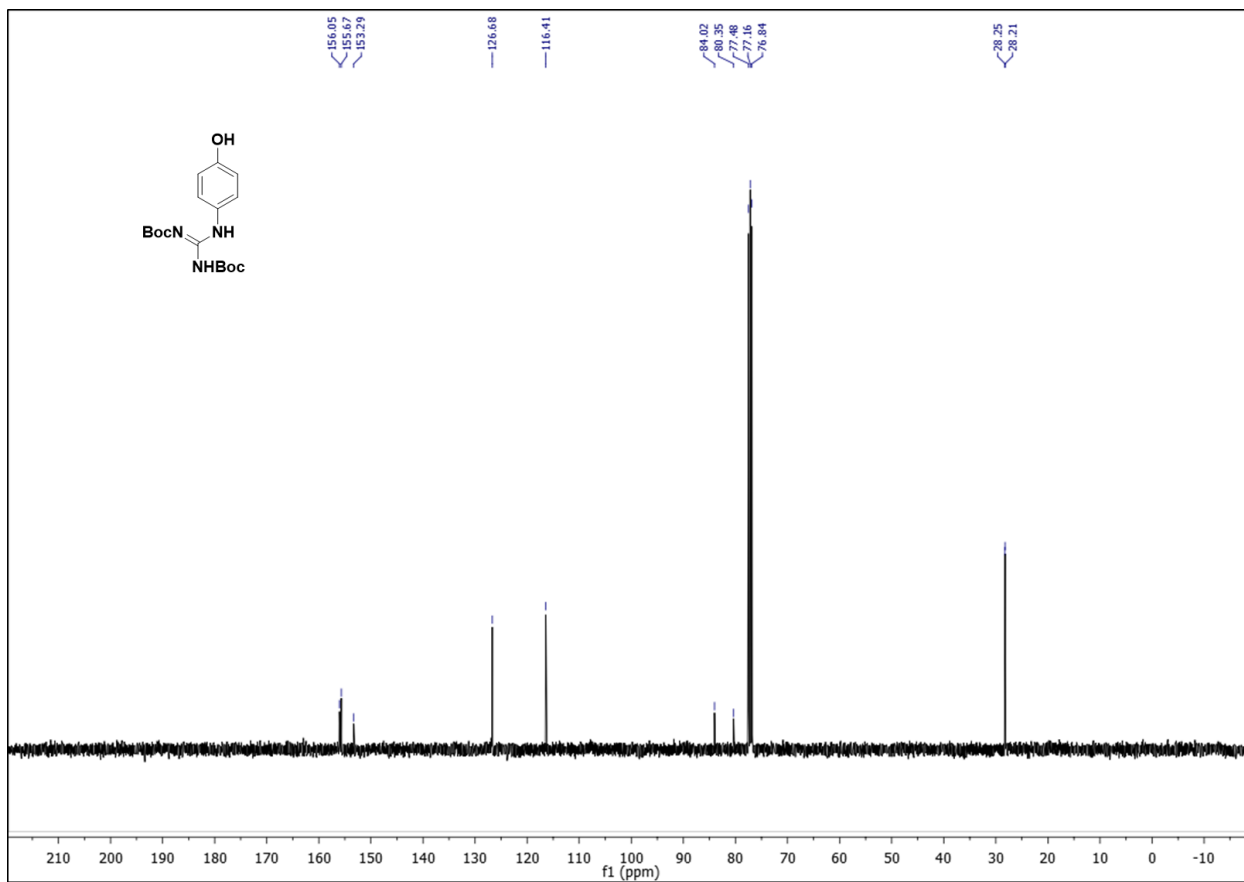

514

515

516

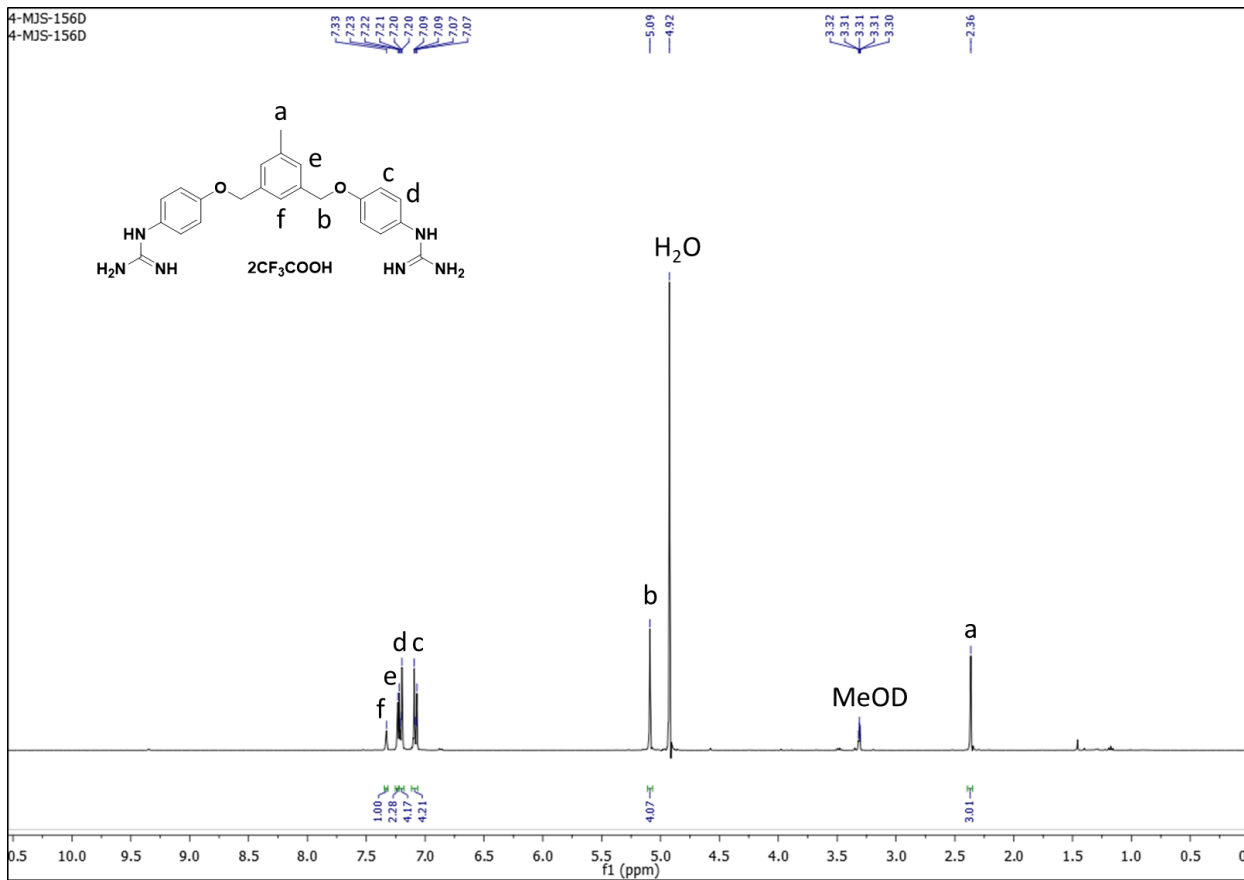

517

518

519

520

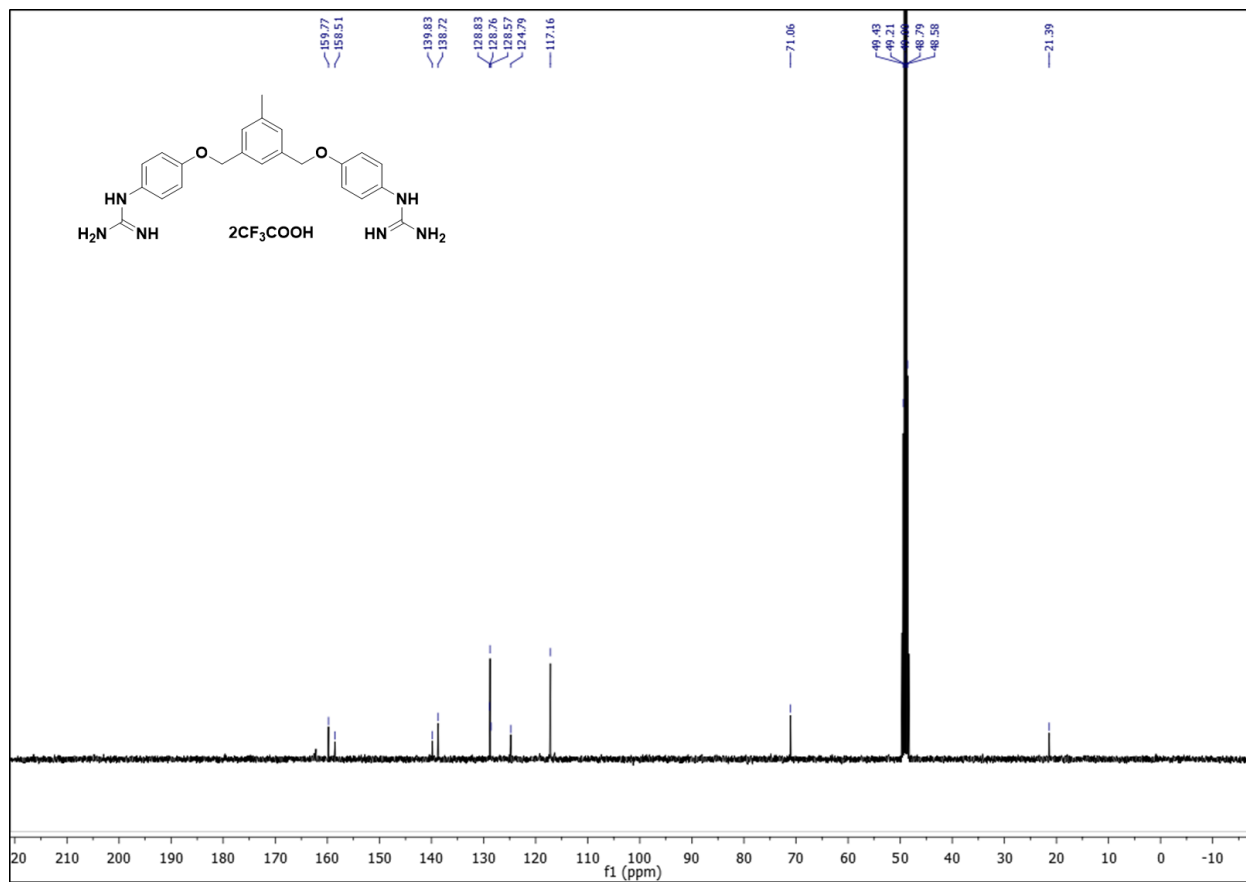



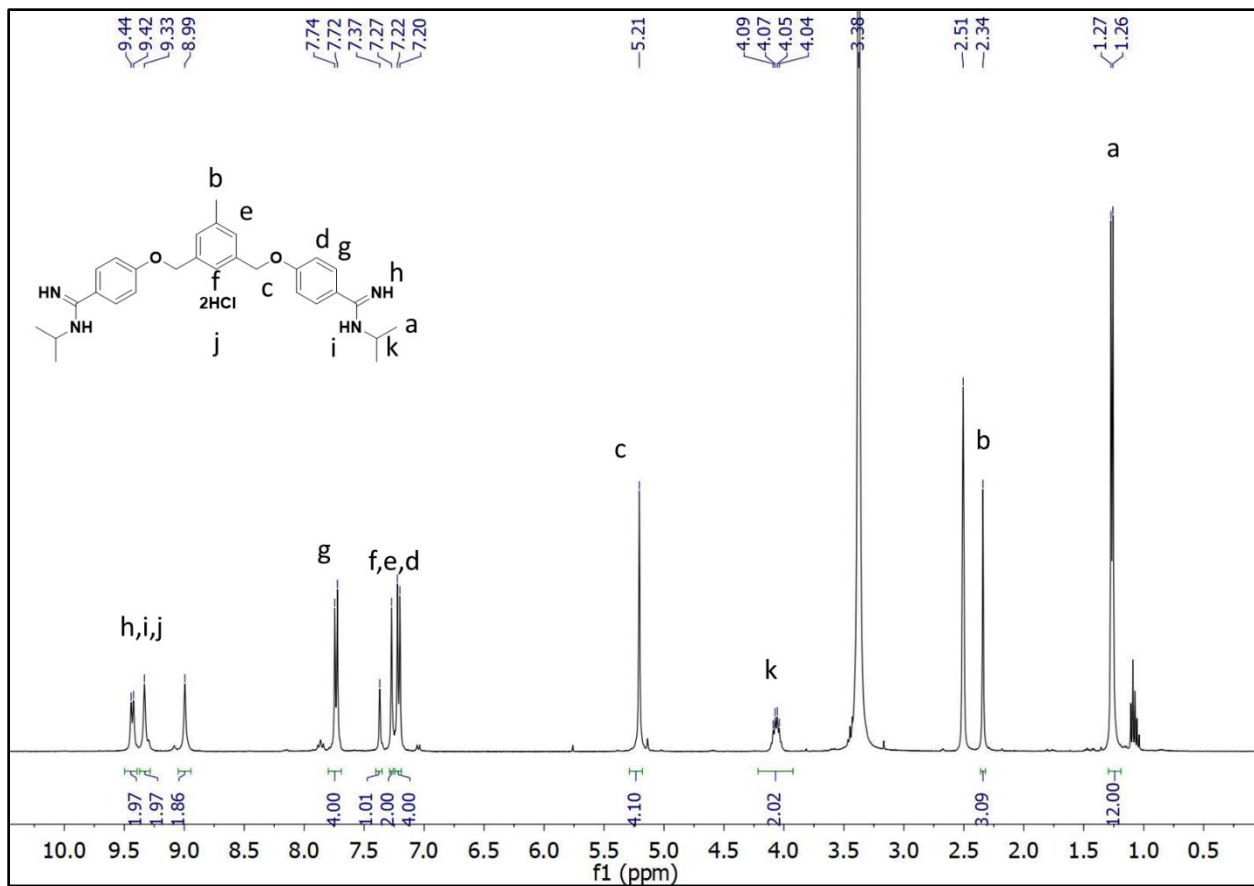

521

522

523

524

525

526

527

528

529

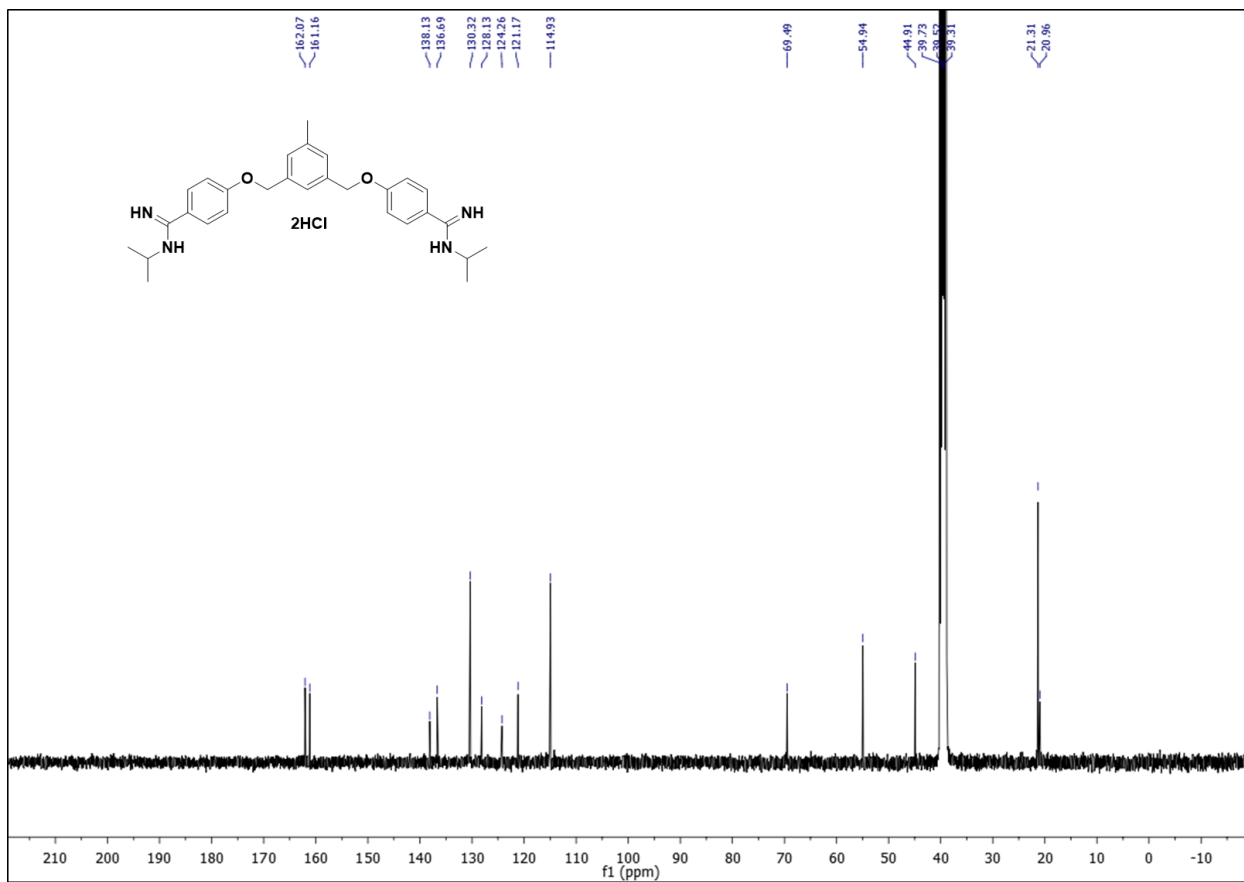

530

531

532

533

534

535

536

537

538

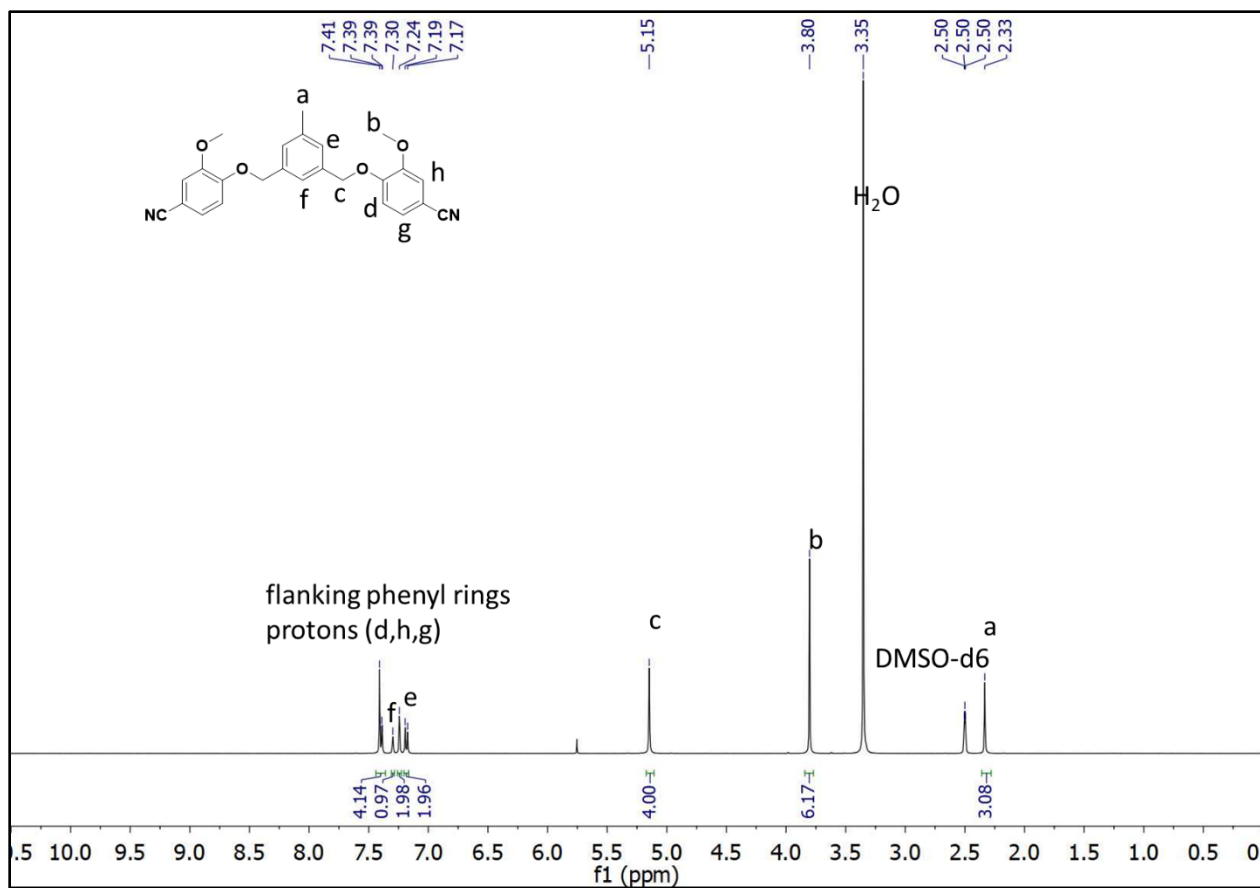

539

540

541

542

543

544

545

546

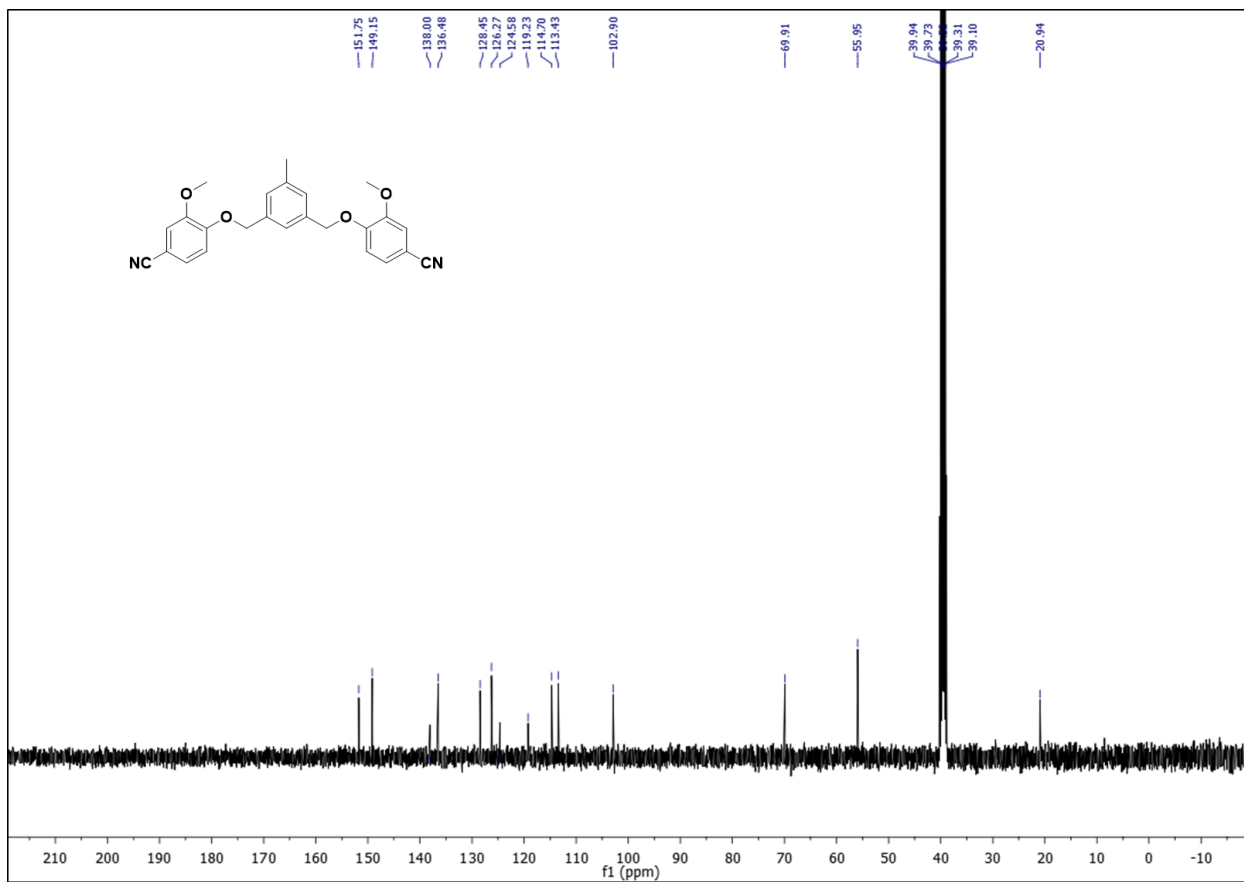

547

548

549

550

551

552

553

554

555

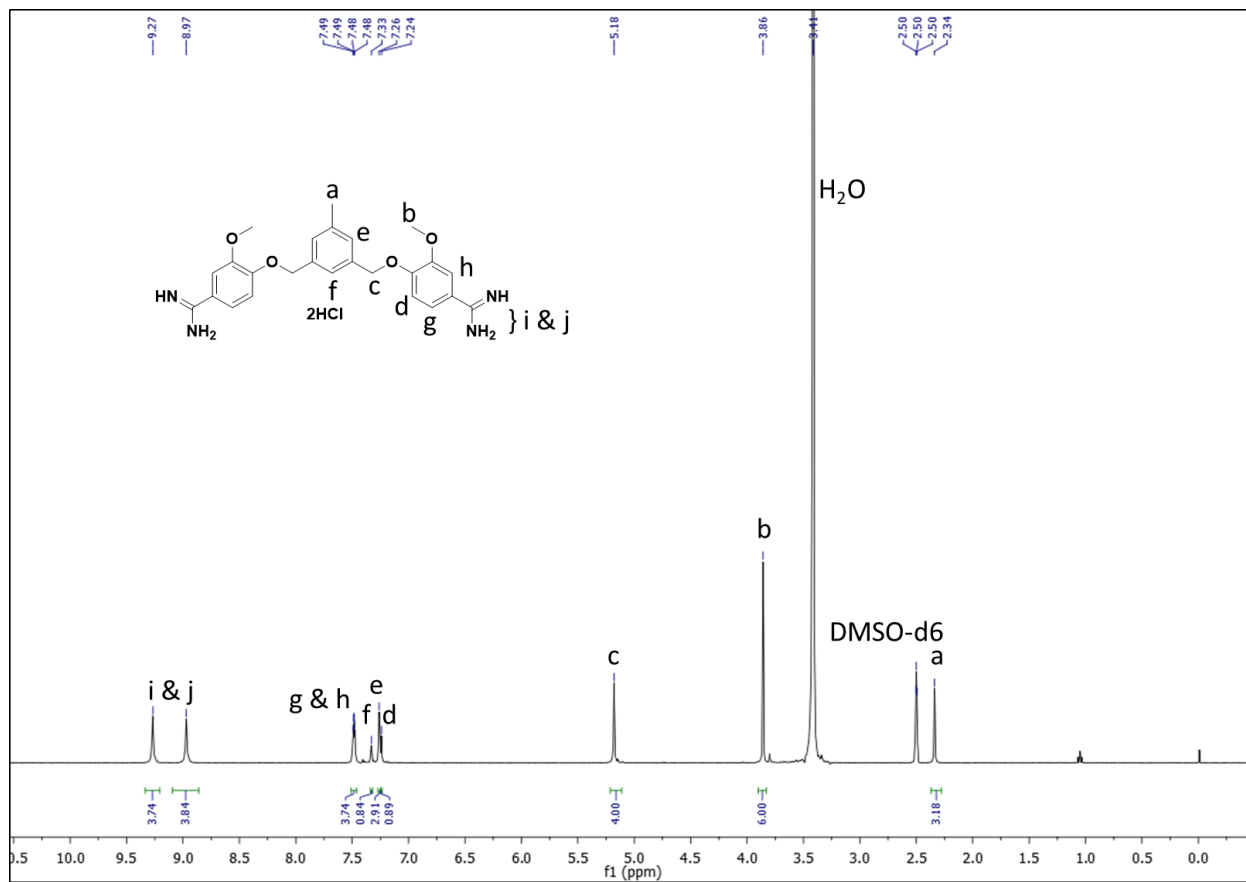

556

557

558

559

560

561

562

563

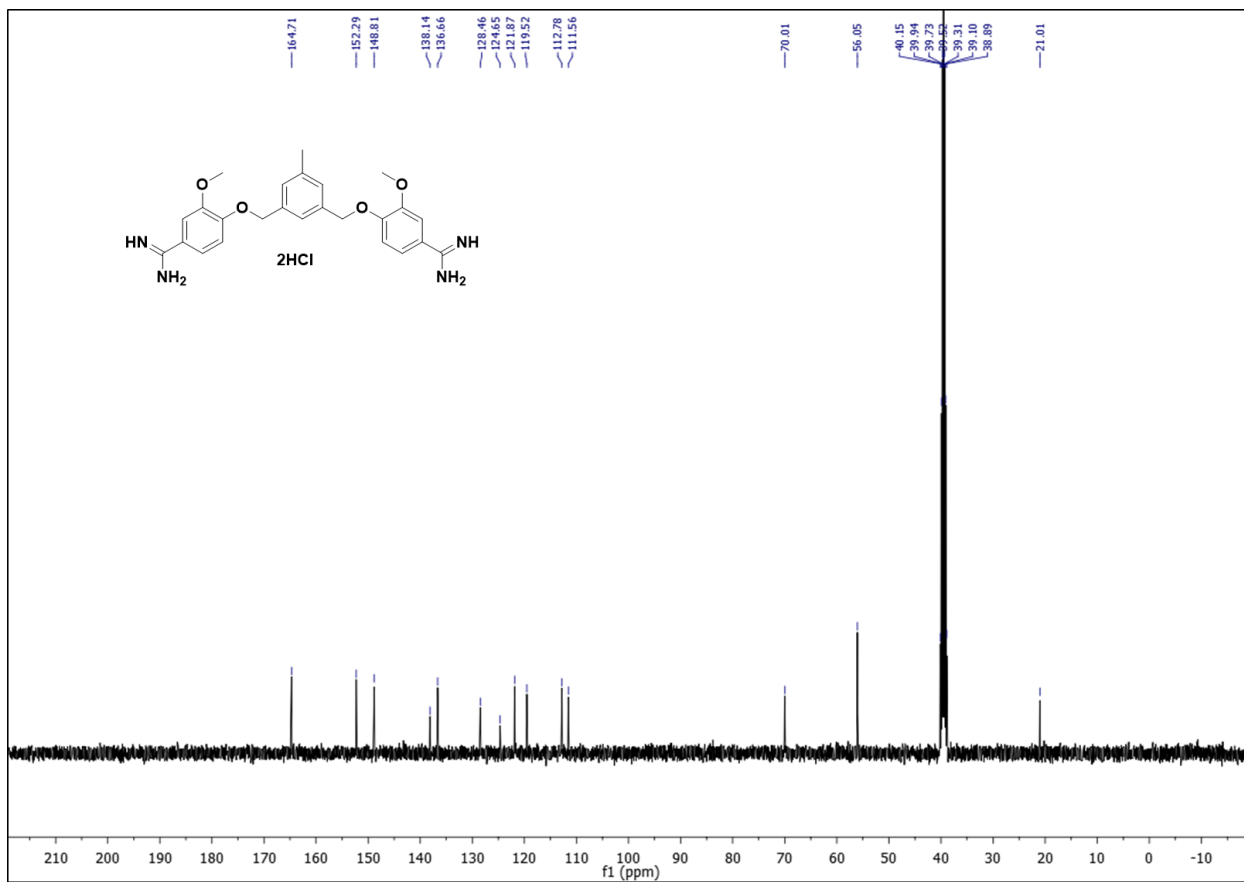

564

565

566

567

568

569

570

571

572

573

574

575

576

577

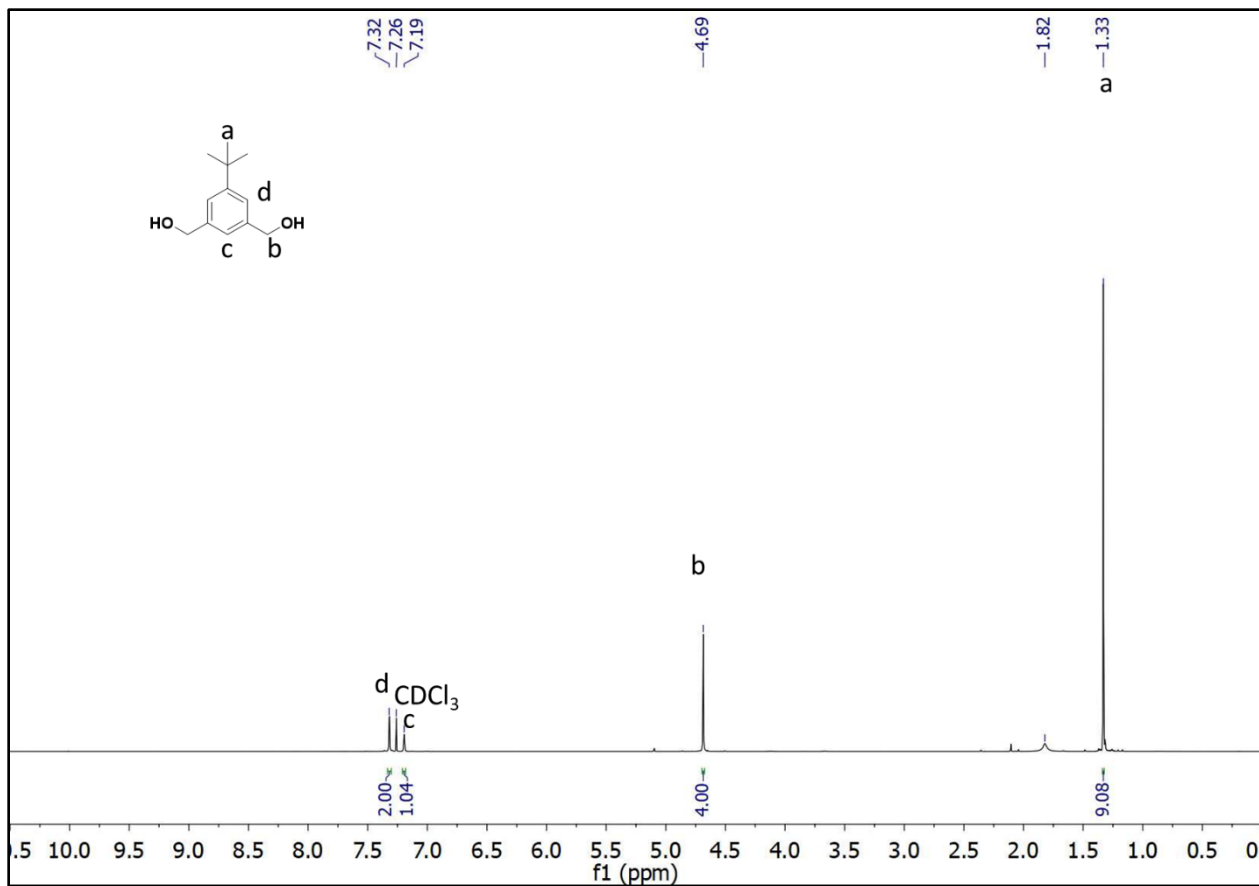

578

579

580

581

582

583

584

585

586

587

588

589

590

591

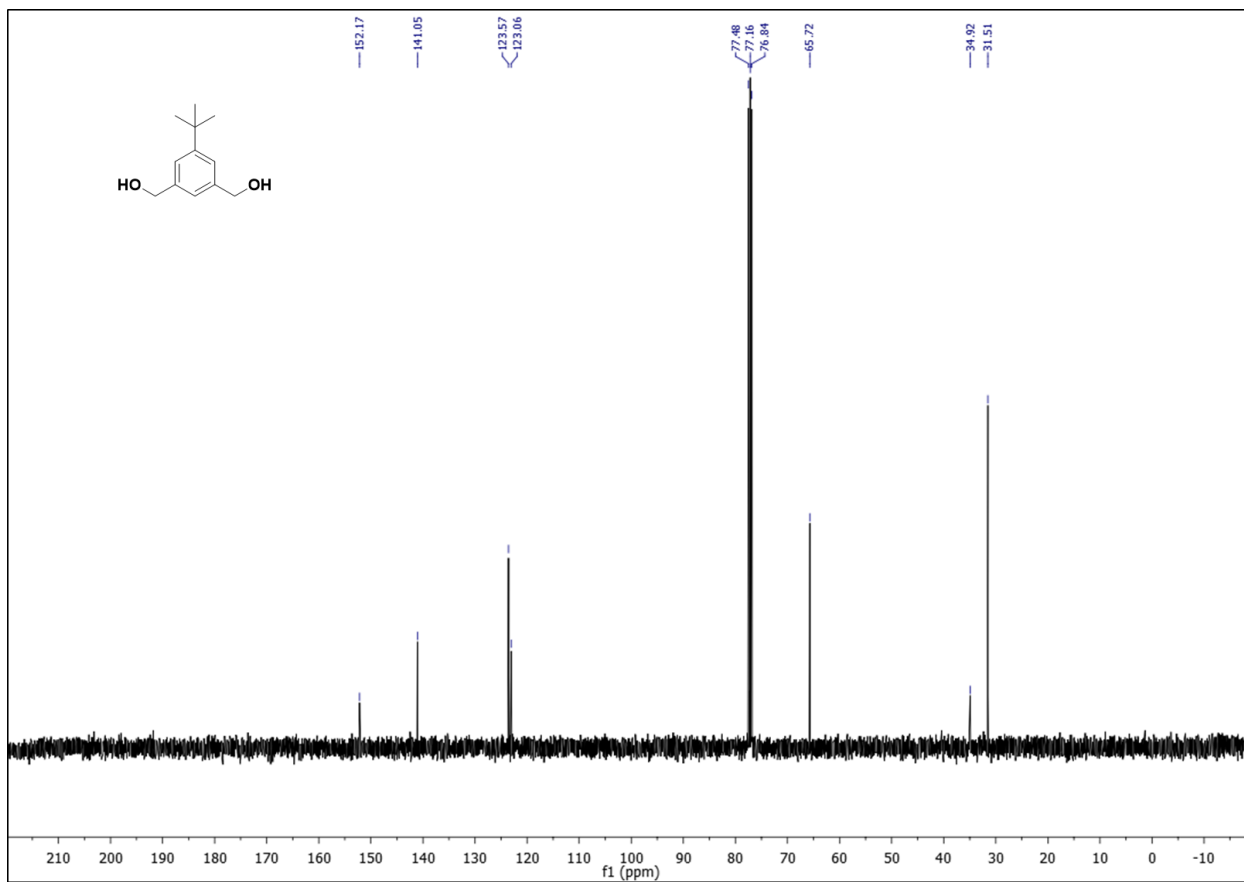

592

593

594

595

596

597

598

599

600

601

602

603

604

605



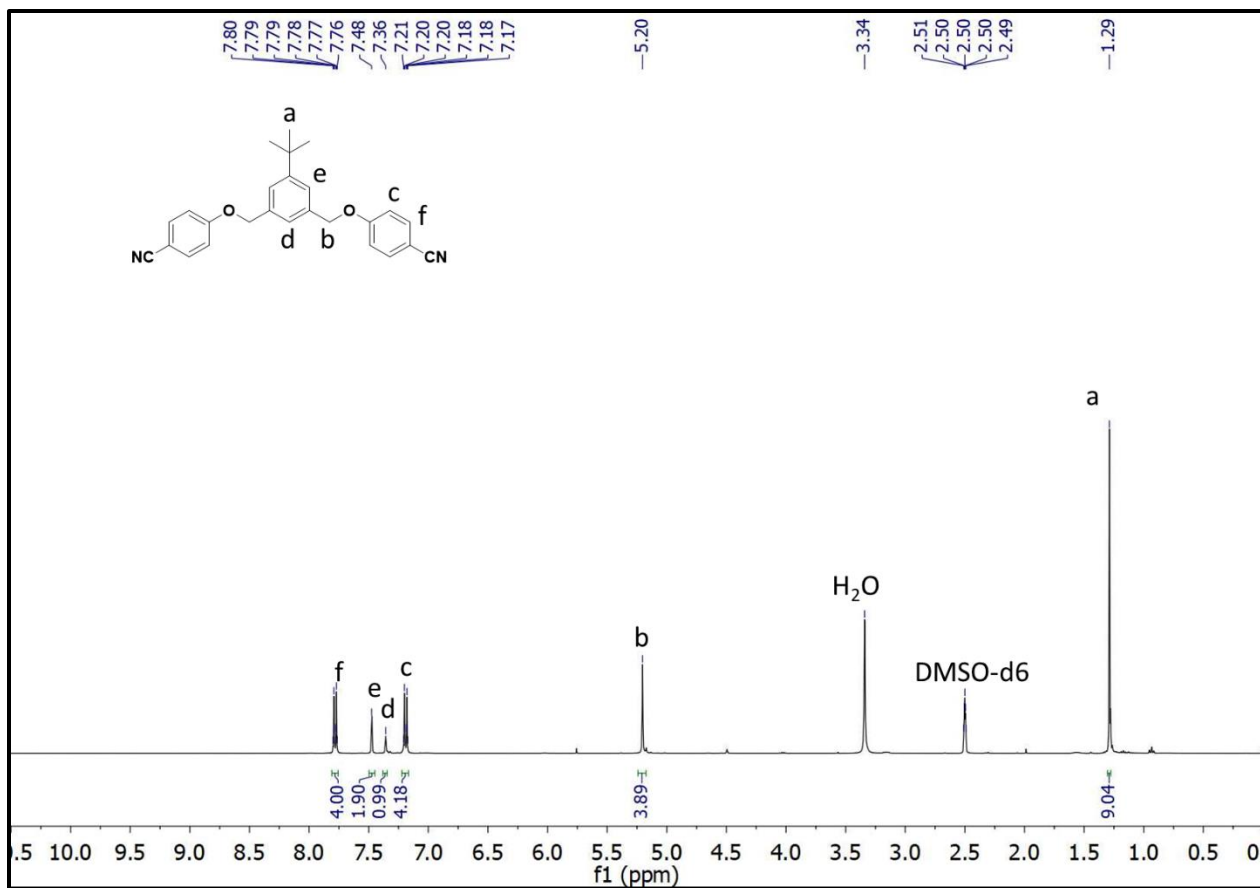

606

607

608

609

610

611

612

613

614

615

616

617

618

619

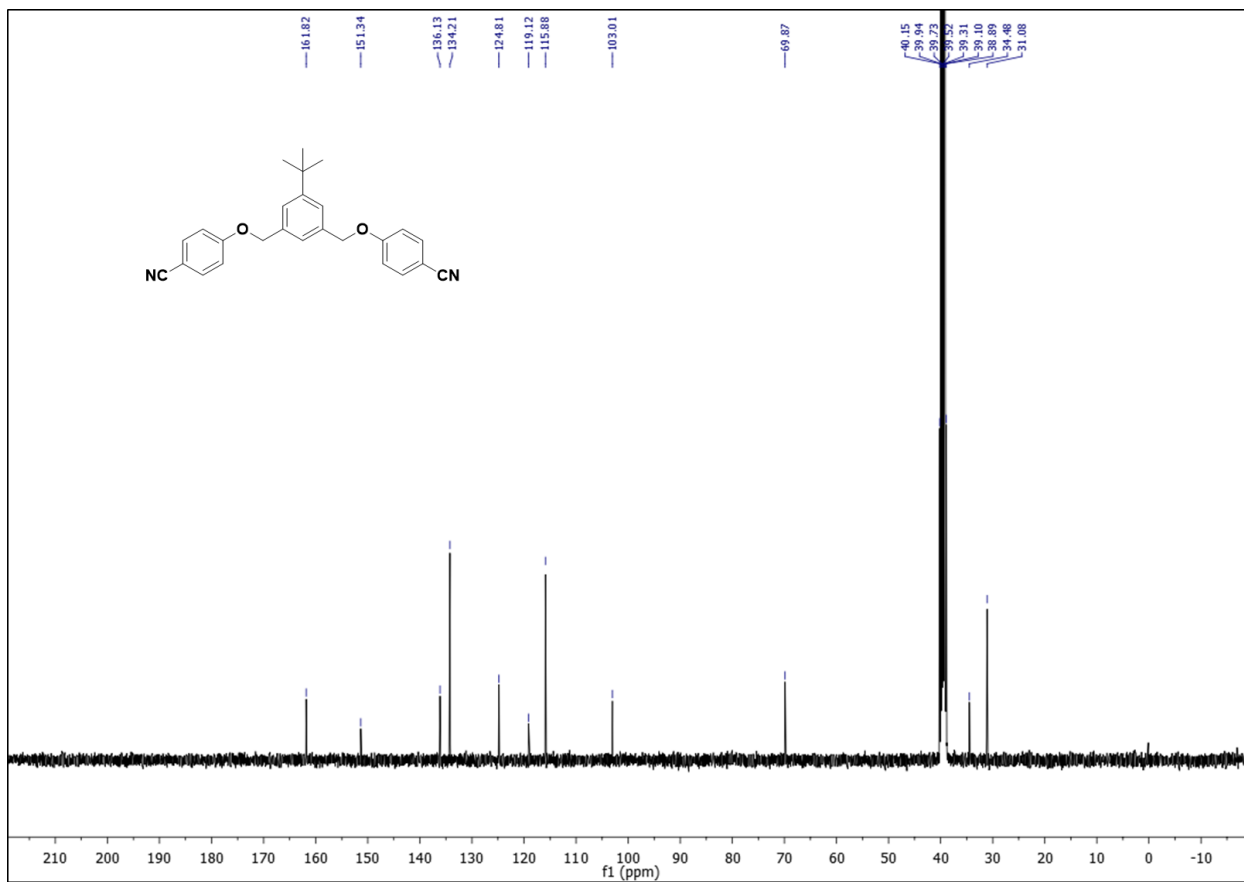

620

621

622

623

624

625

626

627

628

629

630

631

632

633

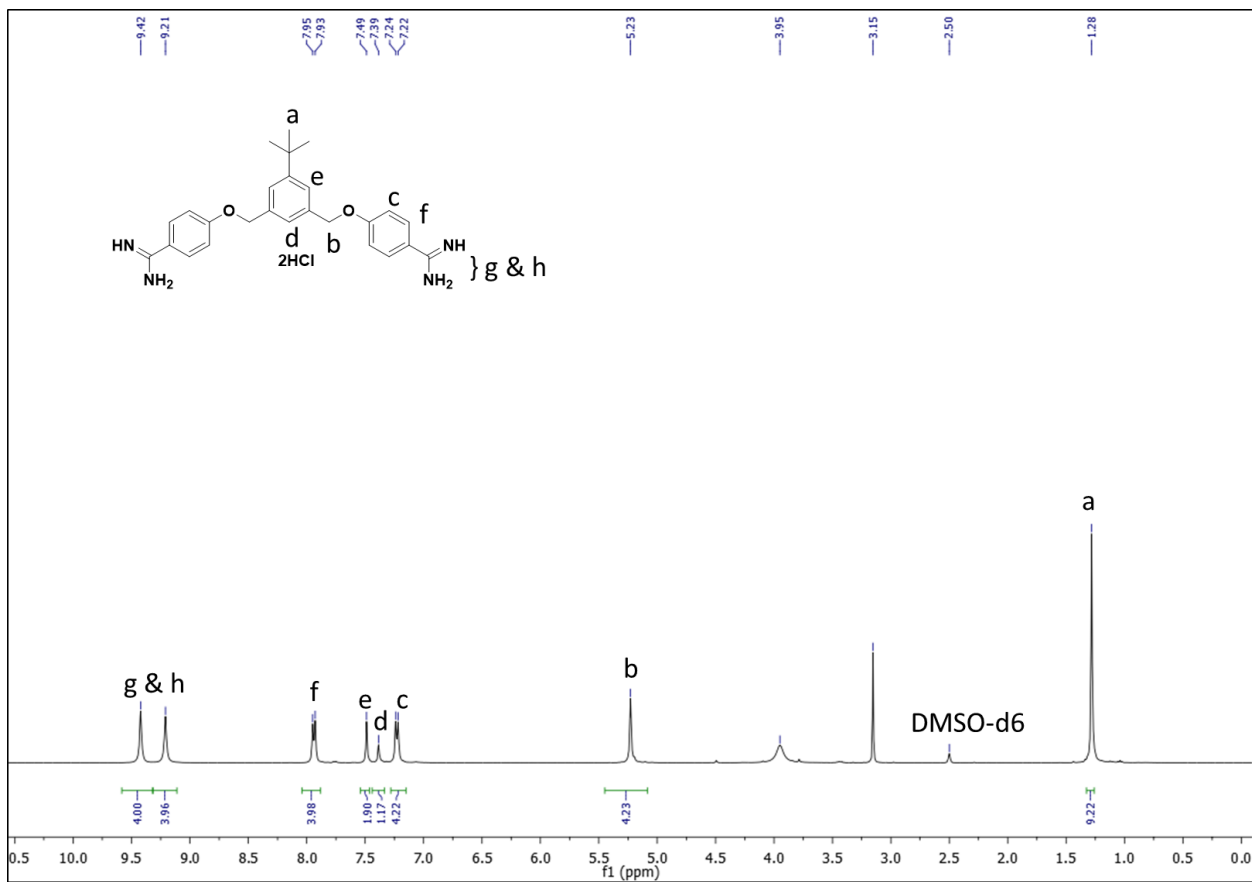

634

635

636

637

638

639

640

641

642

643

644

645

646

647

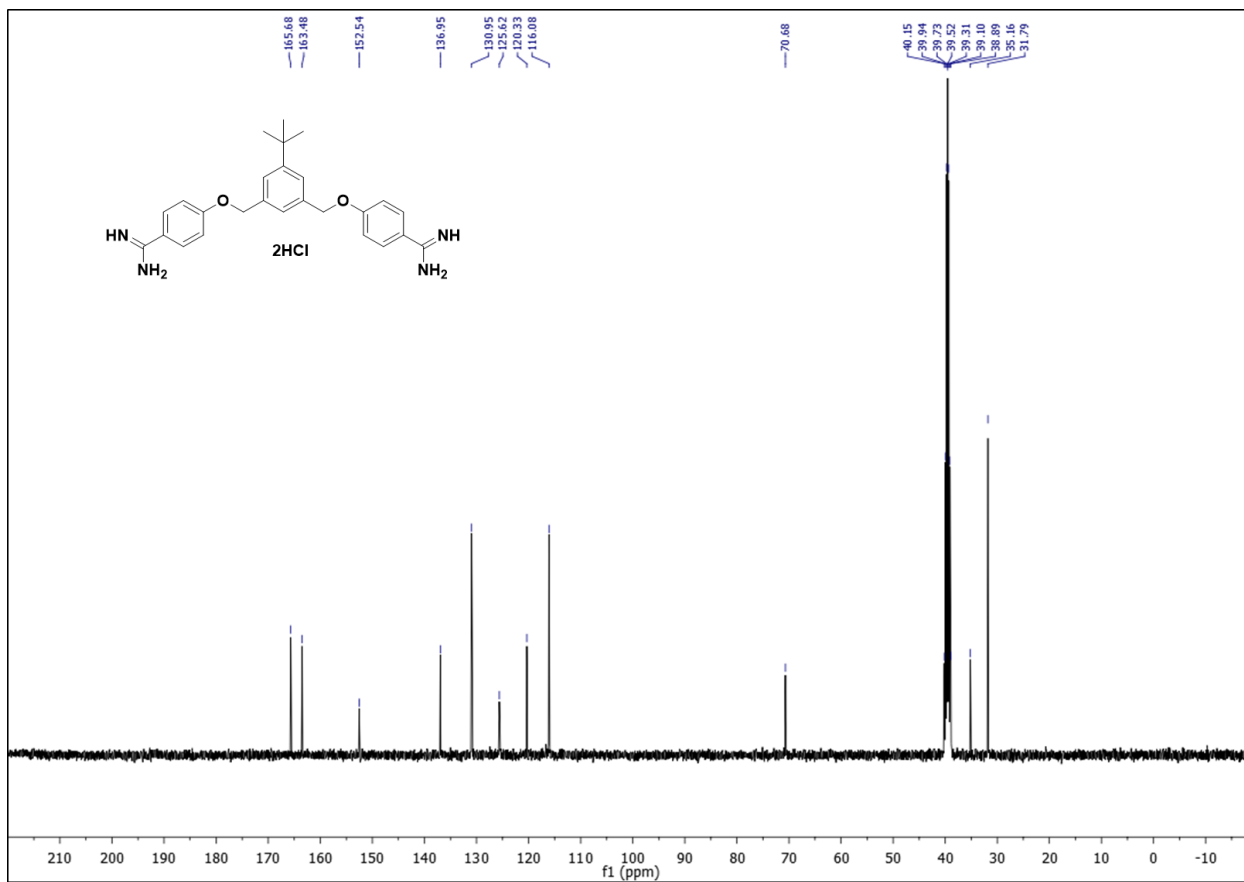

648

649

650

651

652

653

654

655

656

657

658

659

660

661

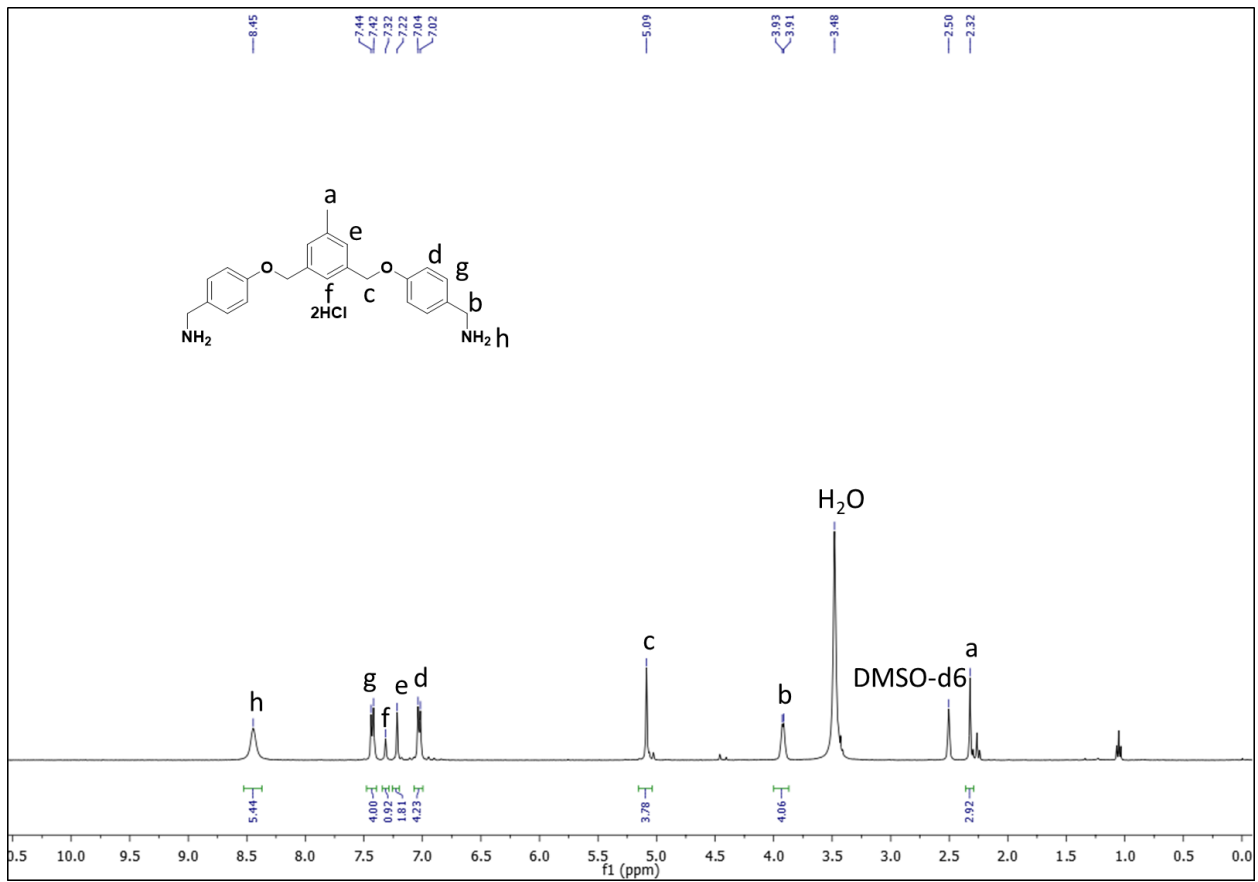

662

663

664

665

666

667

668

669

670

671

672

673

674

675

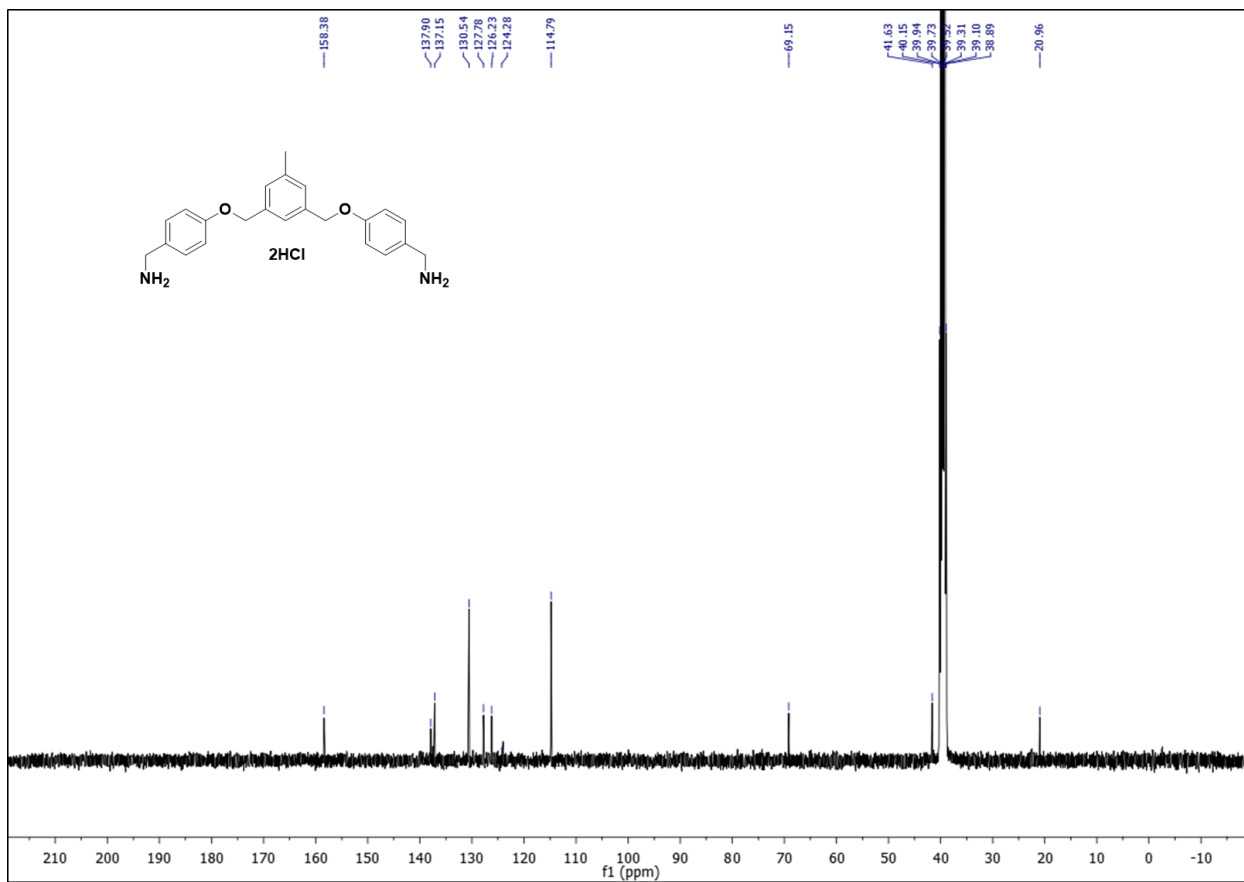

676

677

678

679

680

681

682

683

684

685

686

687

688

689

690

691

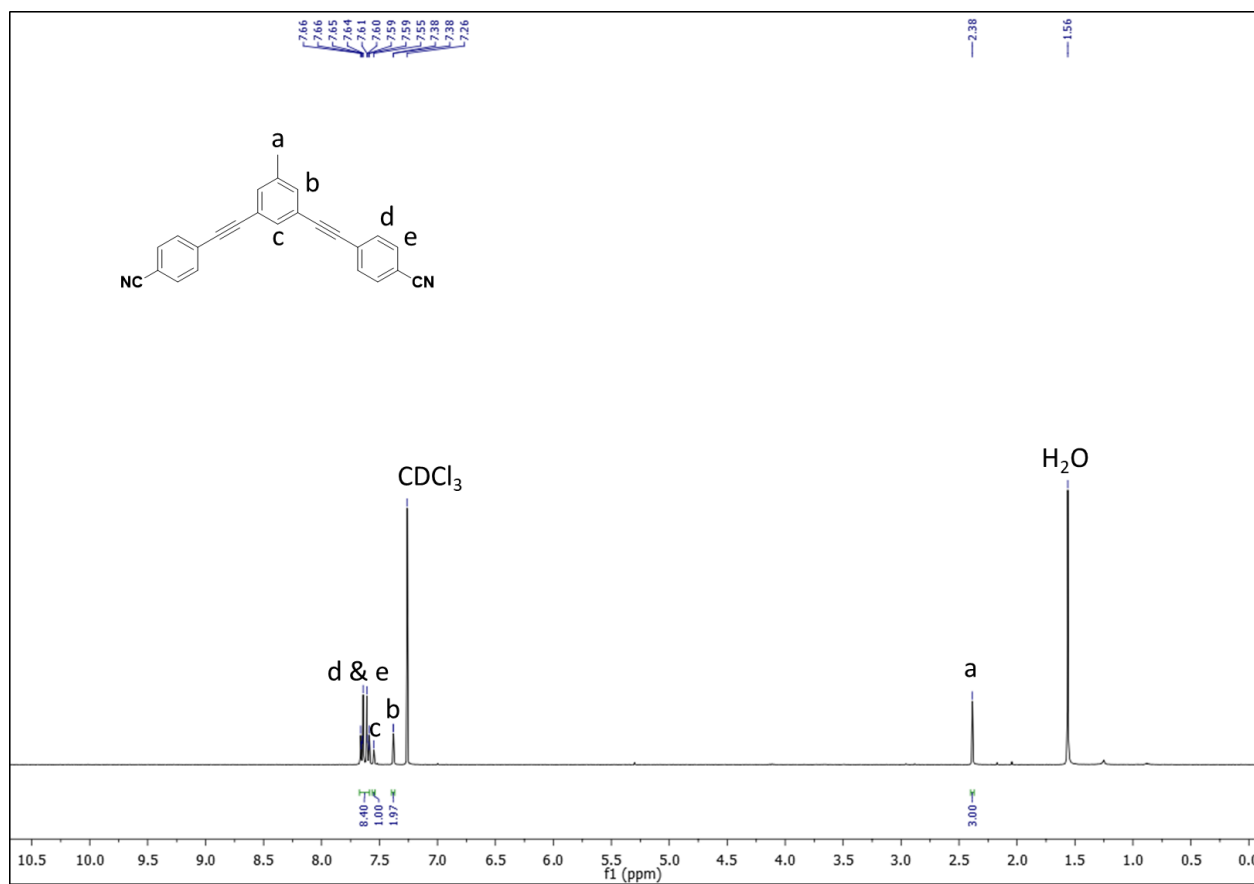

692

693

694

695

696

697

698

699

700

701

702

703

704

705

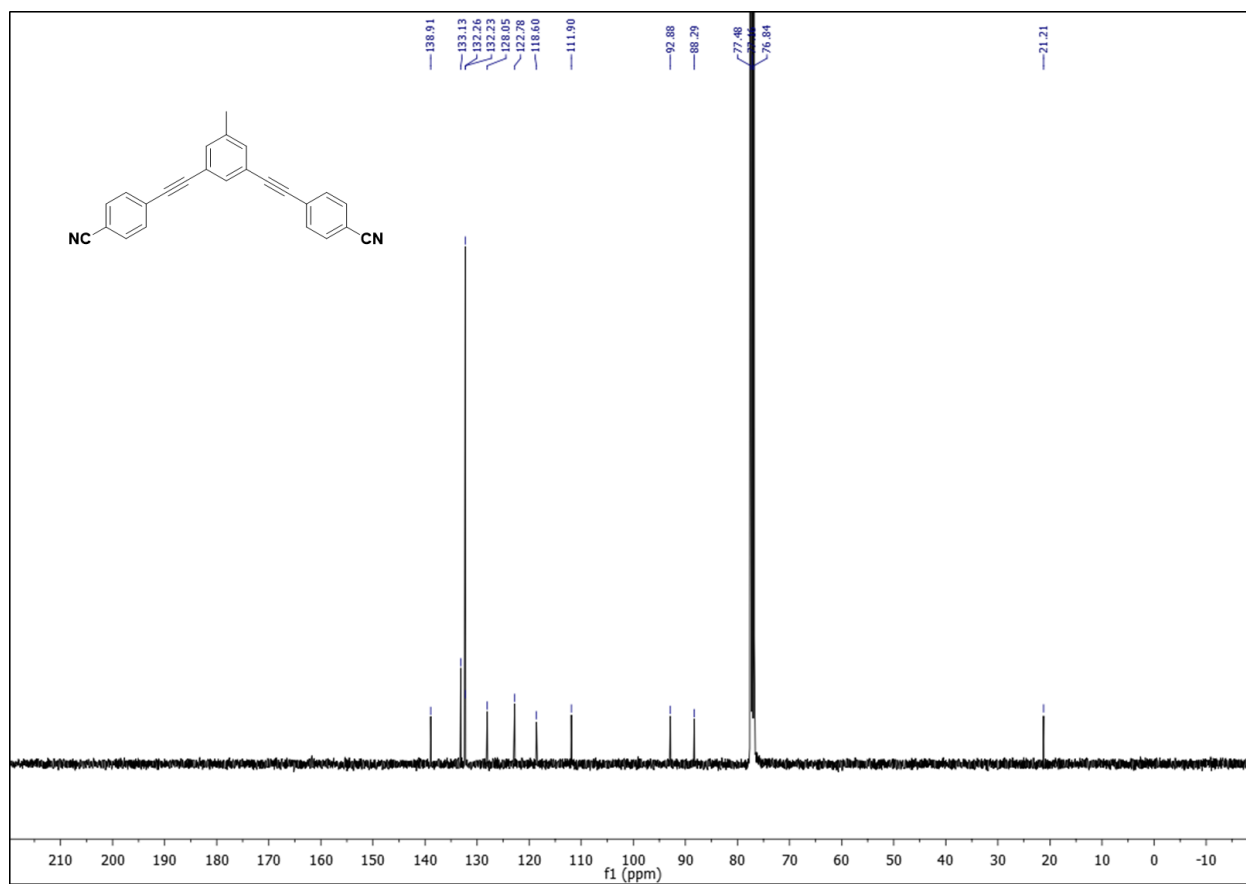

706

707

708

709

710

711

712

713

714

715

716

717

718

719



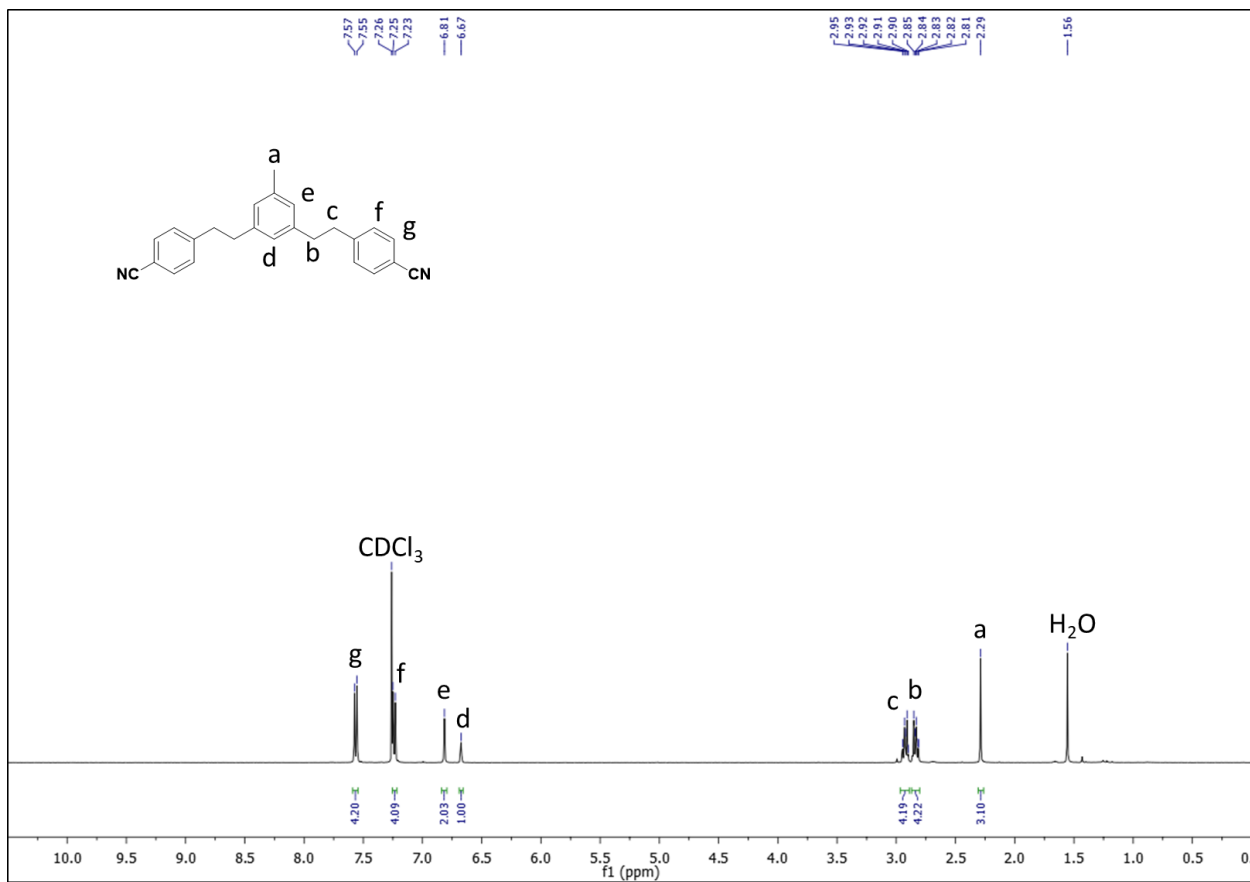

720

721

722

723

724

725

726

727

728

729

730

731

732

733

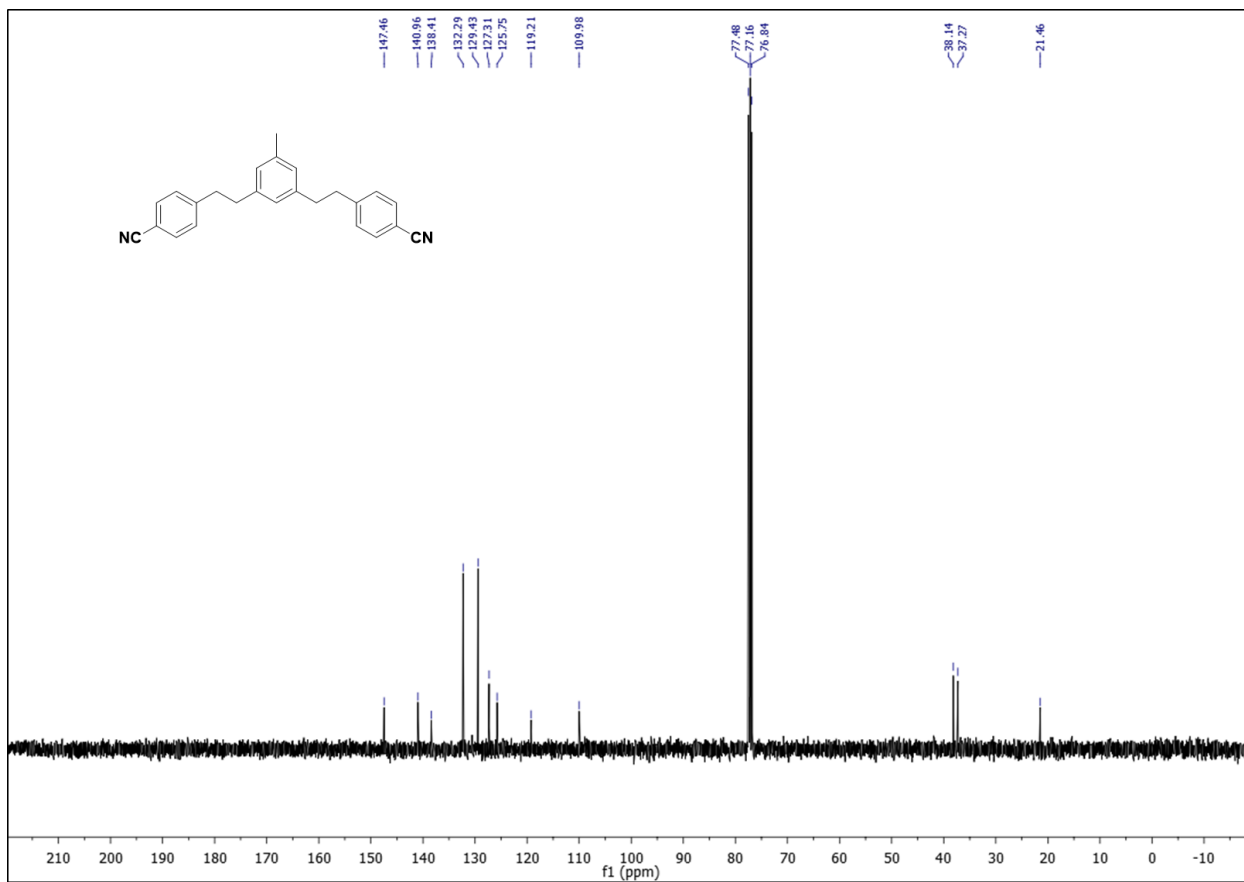

734

735

736

737

738

739

740

741

742

743

744

745

746

747

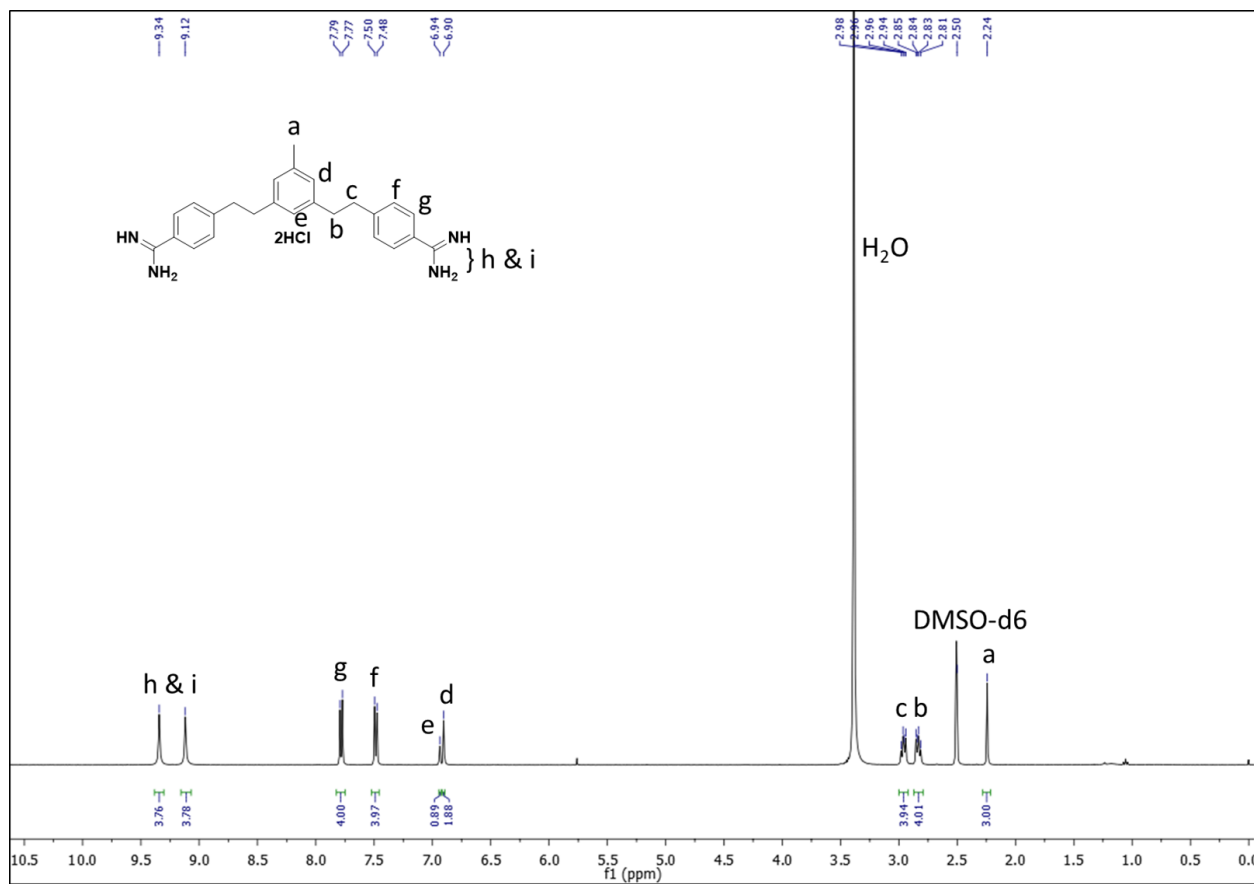

748

749

750

751

752

753

754

755

756

757

758

759

760

761

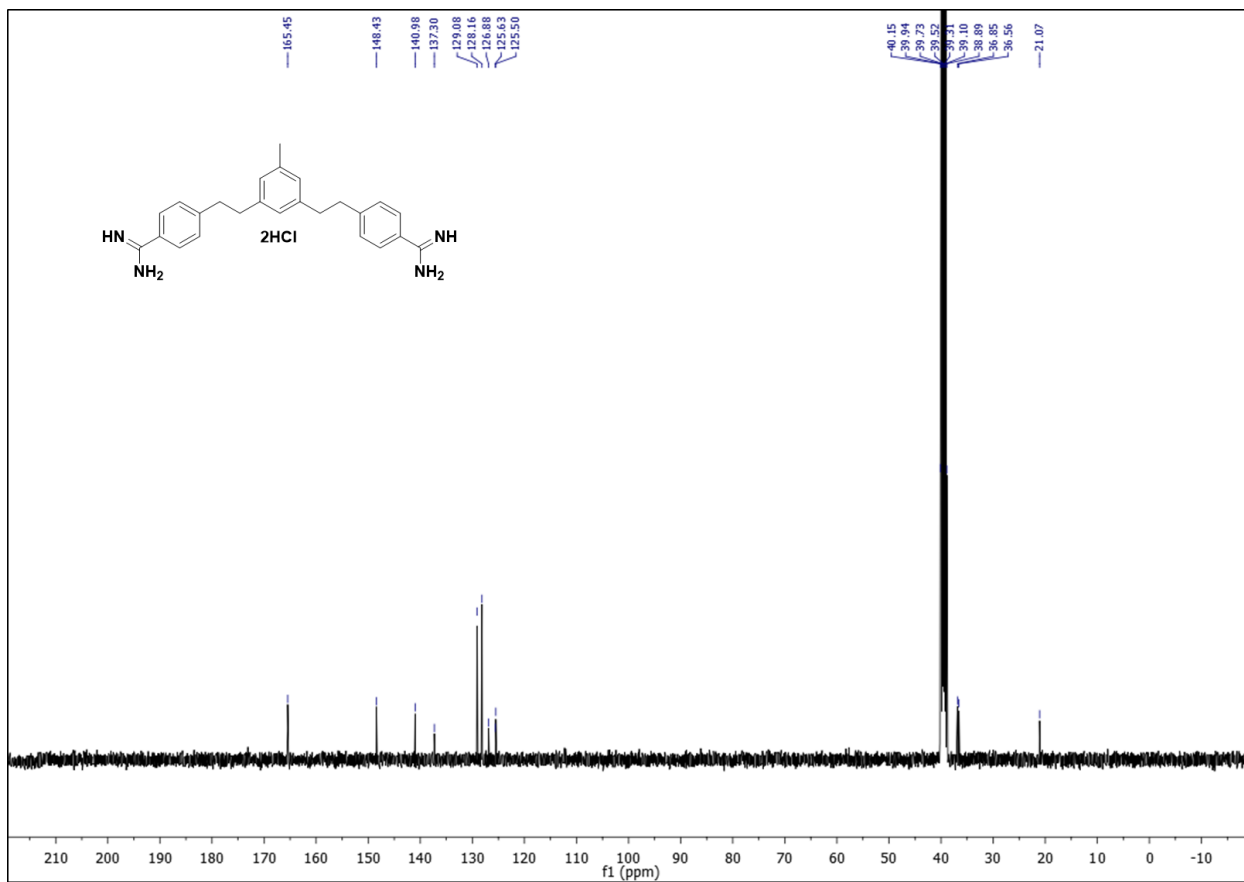

762

763

764

765

766

767

768

769

770

771

772

773

774

775

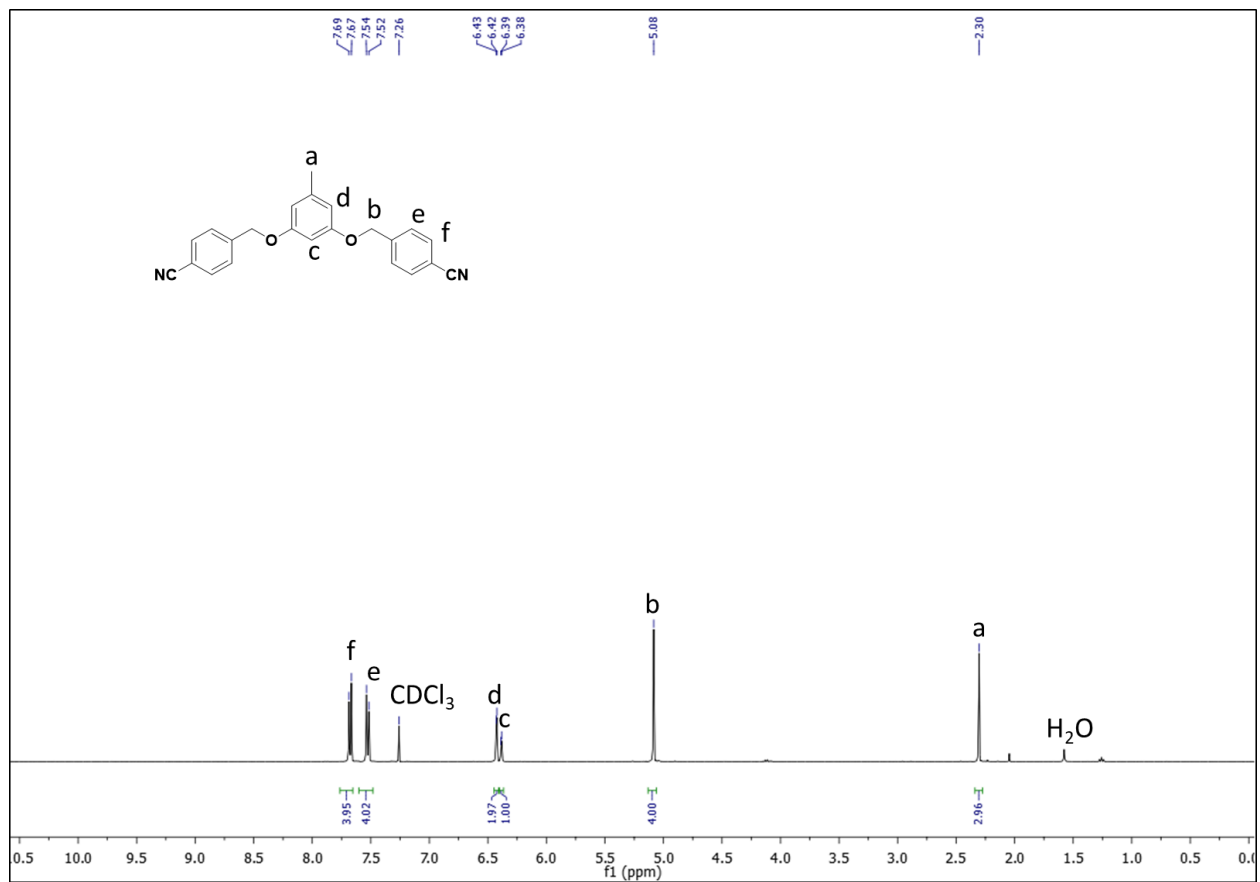

776

777

778

779

780

781

782

783

784

785

786

787

788

789

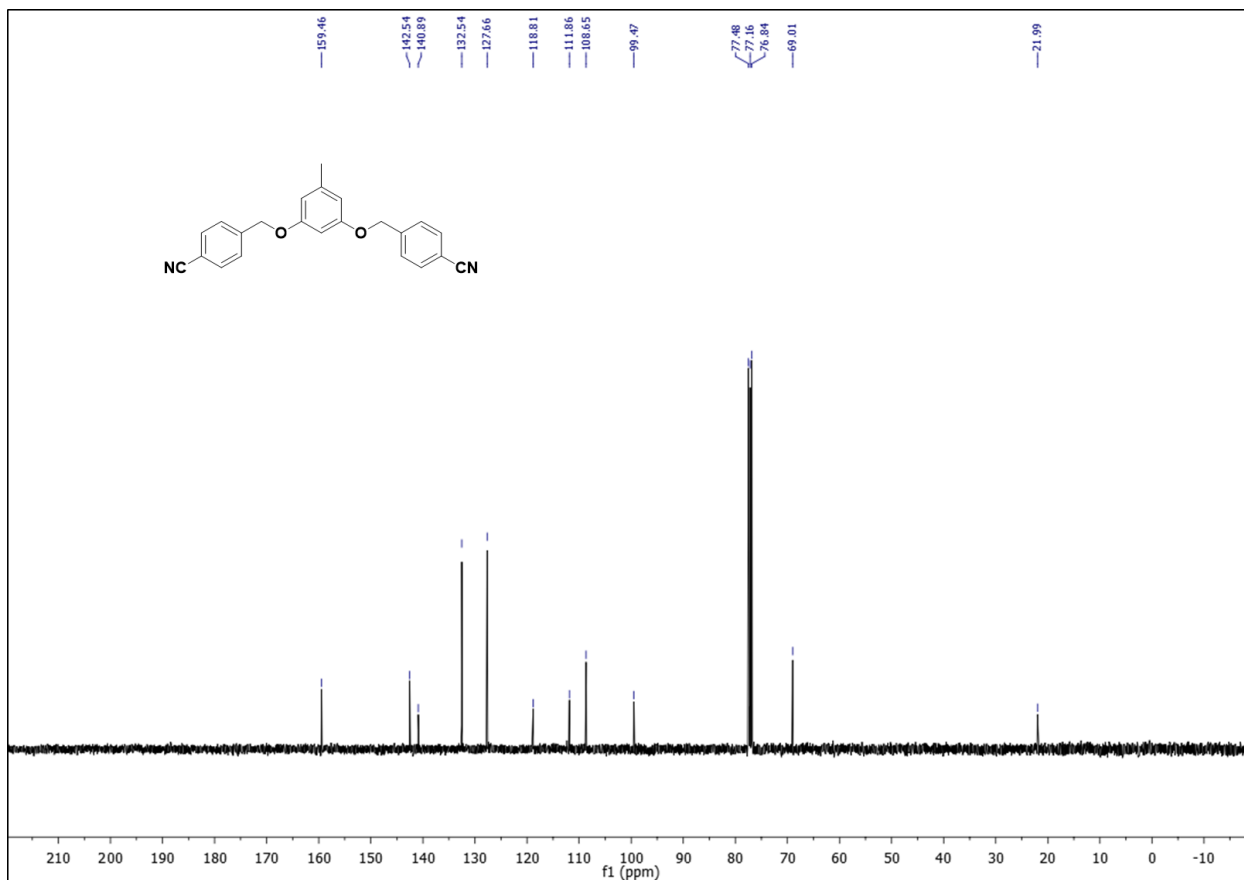

790

791

792

793

794

795

796

797

798

799

800

801

802

803

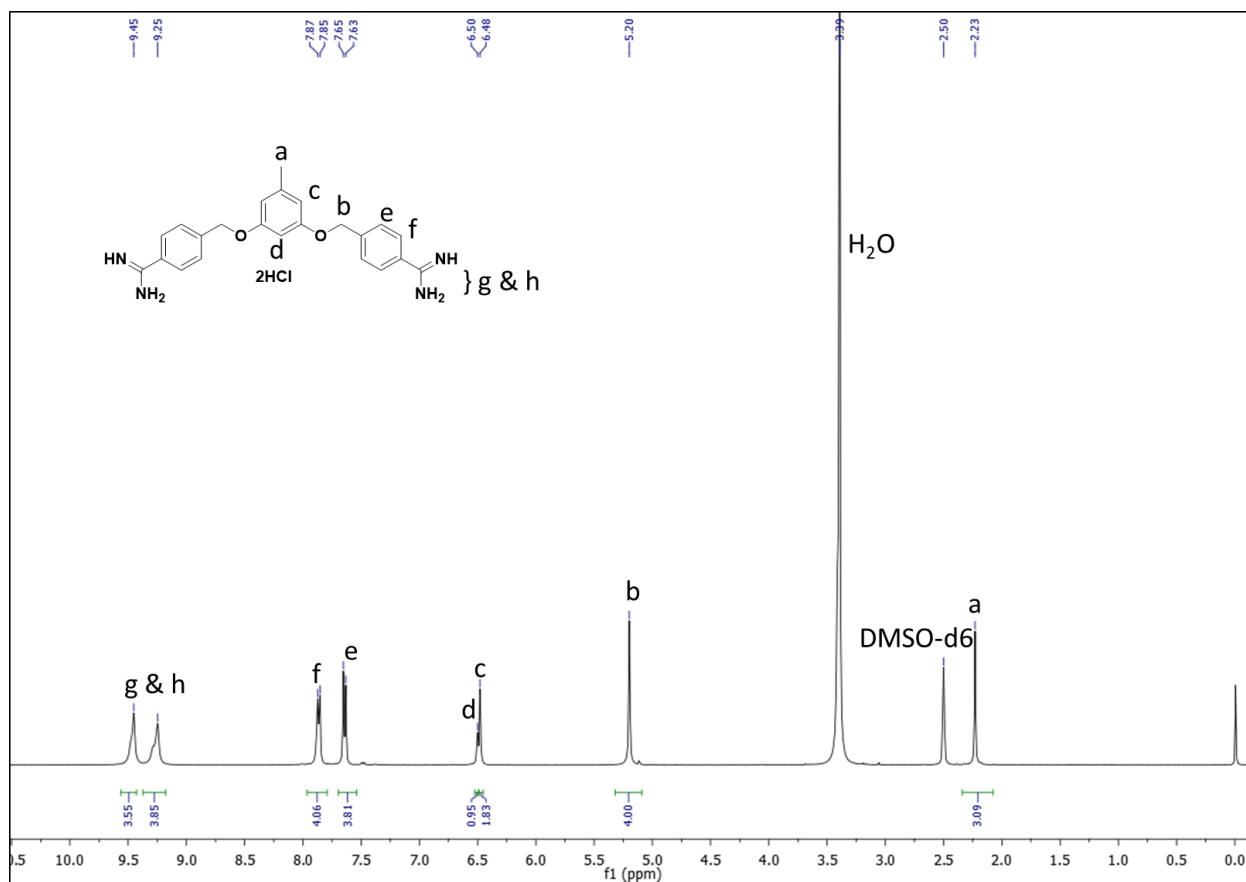

804

805

806

807

808

809

810

811

812

813

814

815

816

817

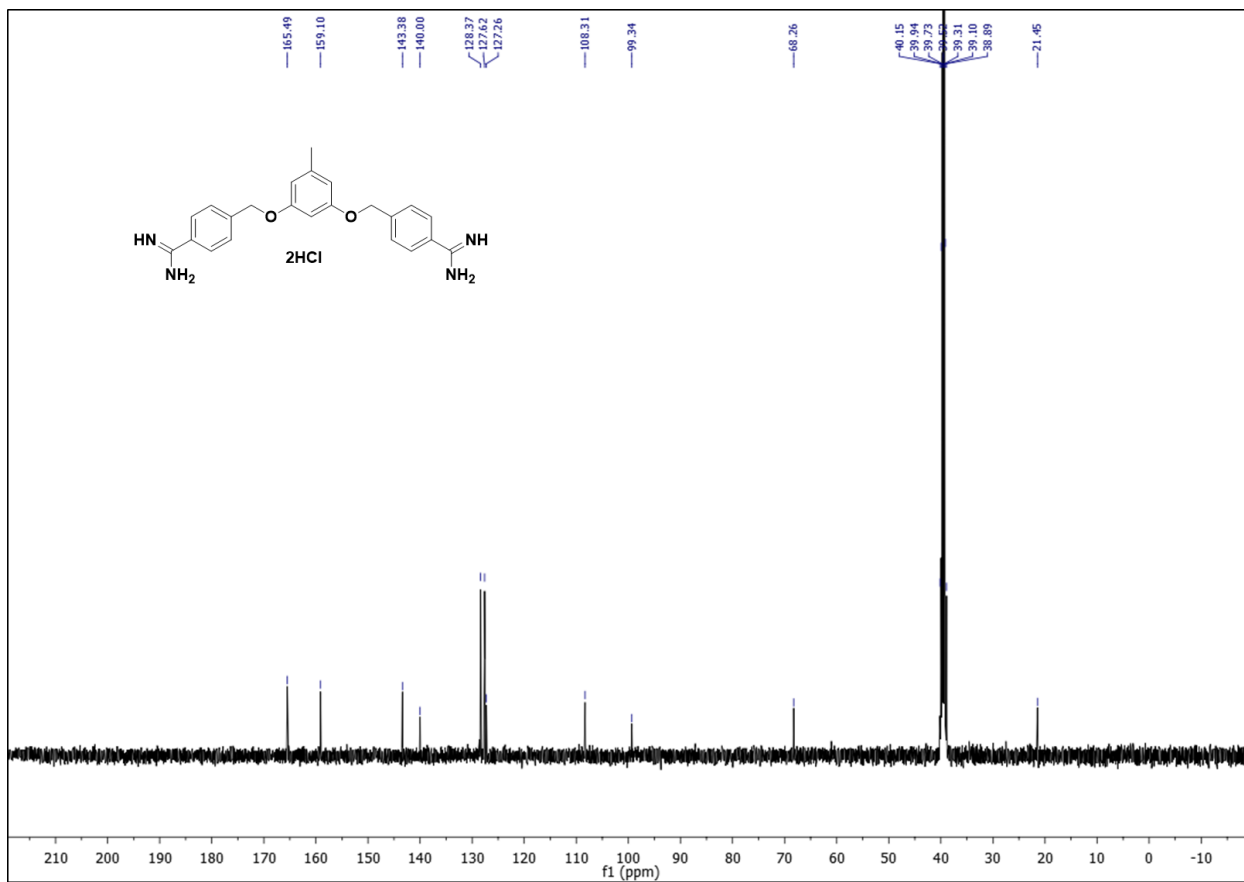

818

819

820

821

822

823

824

825

826

827

828

829

830

831



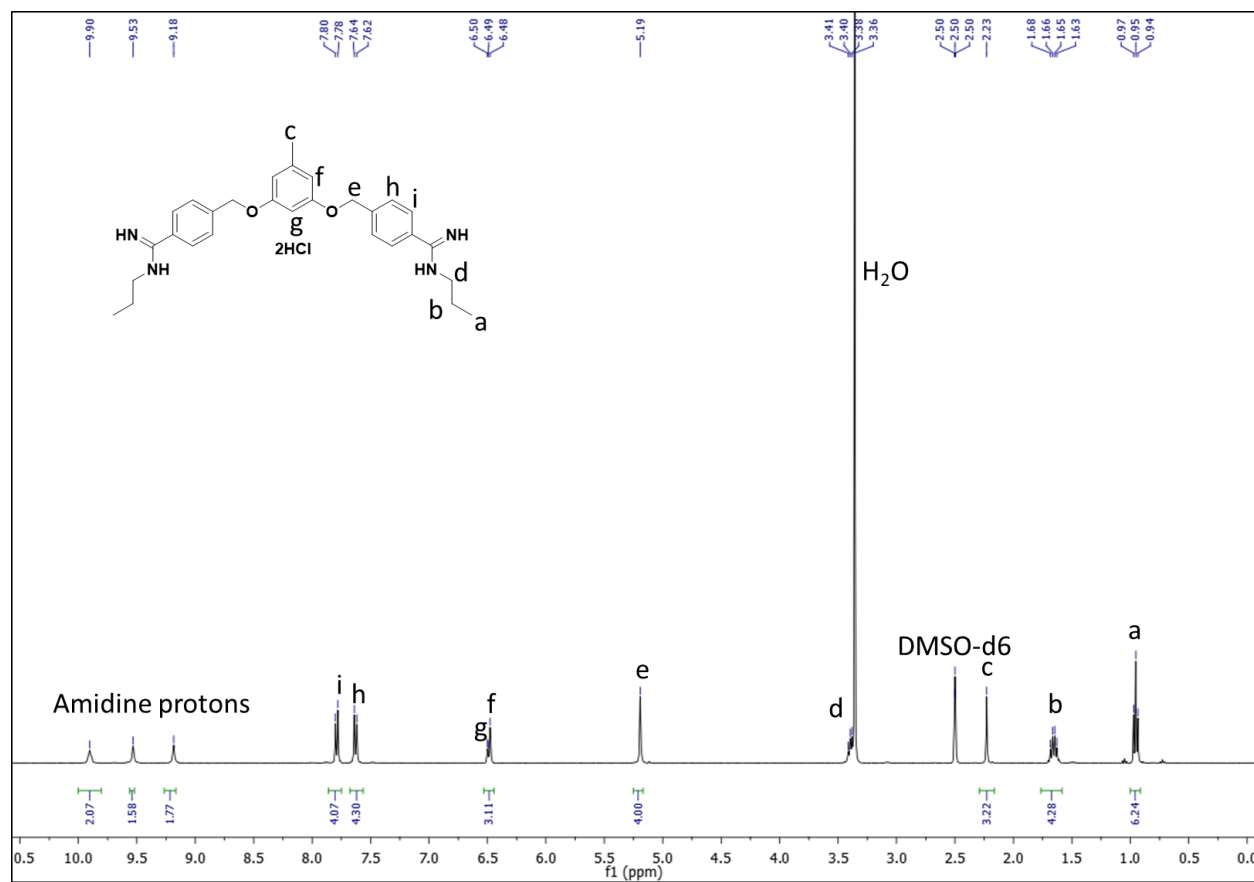

832

833

834

835

836

837

838

839

840

841

842

843

844

845

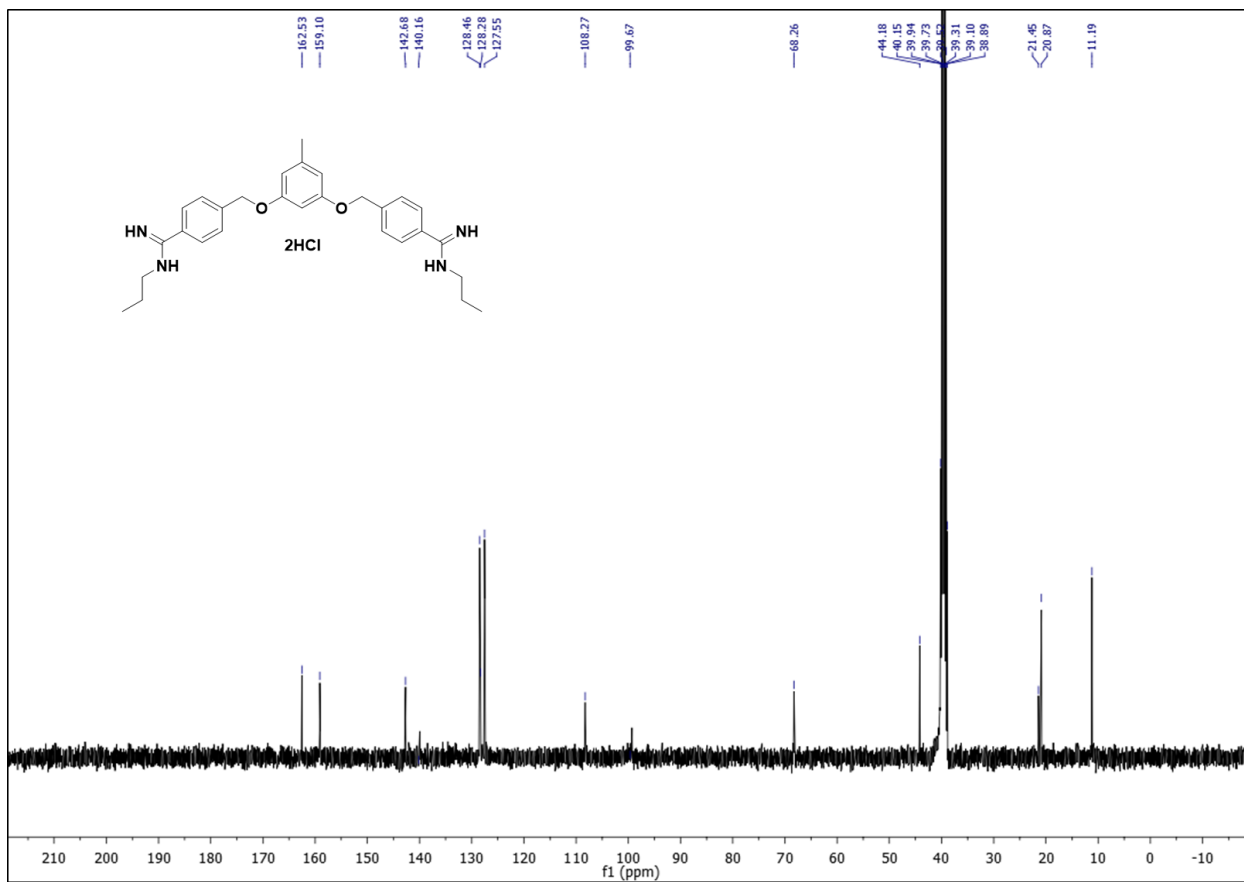

846

847

848

849

850

851

852

853

854

855

856

857

858

859

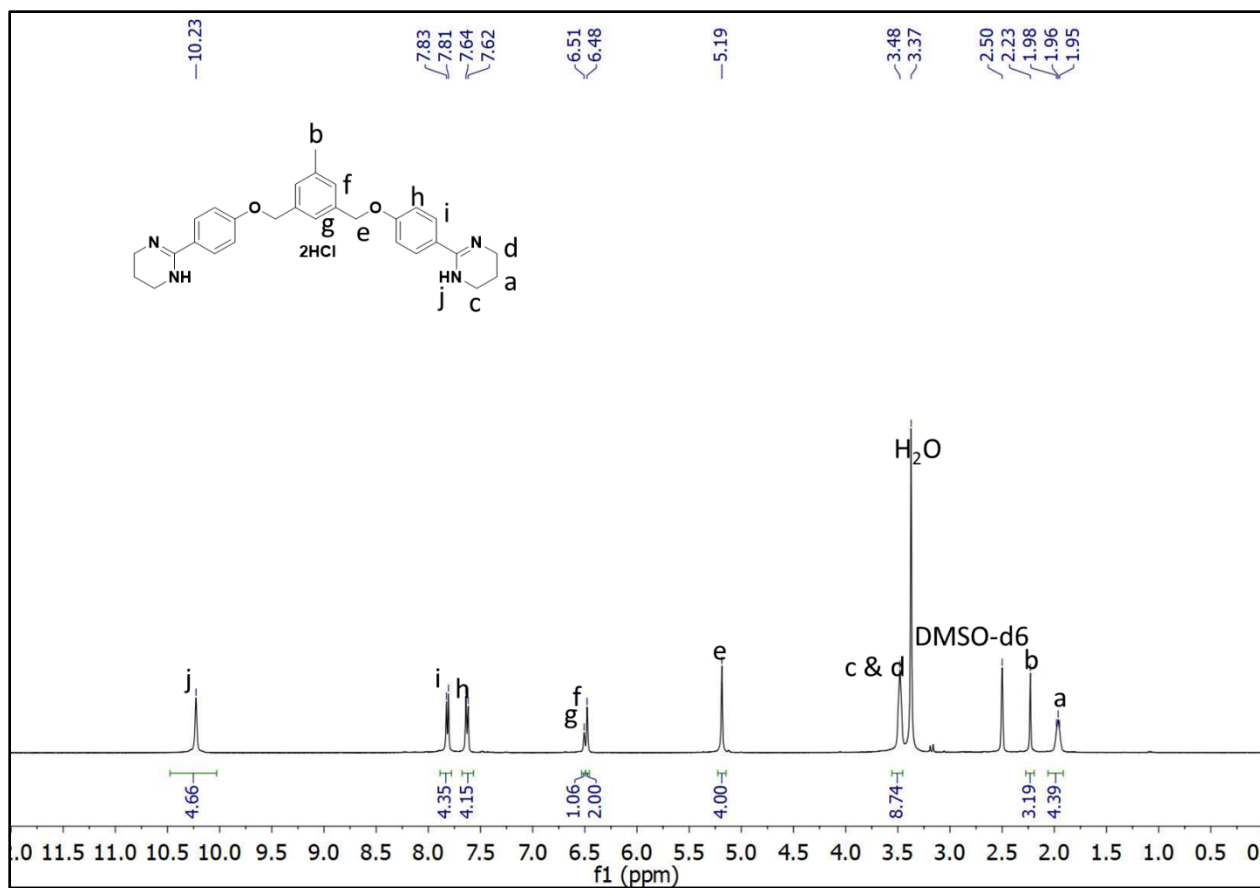

860

861

862

863

864

865

866

867

868

869

870

871

872

873

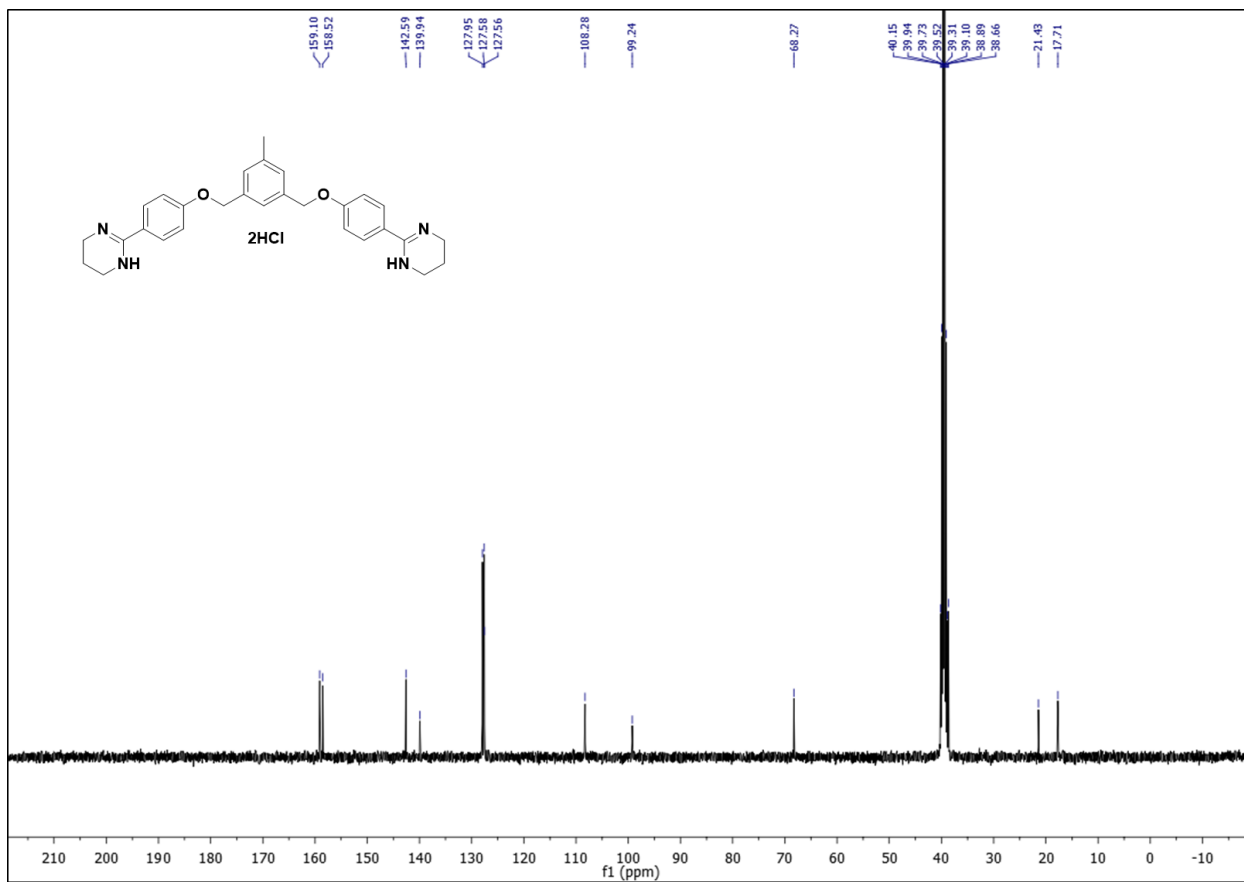

874

875

876

877

878

879

880

881

882

883

884

885

886

887

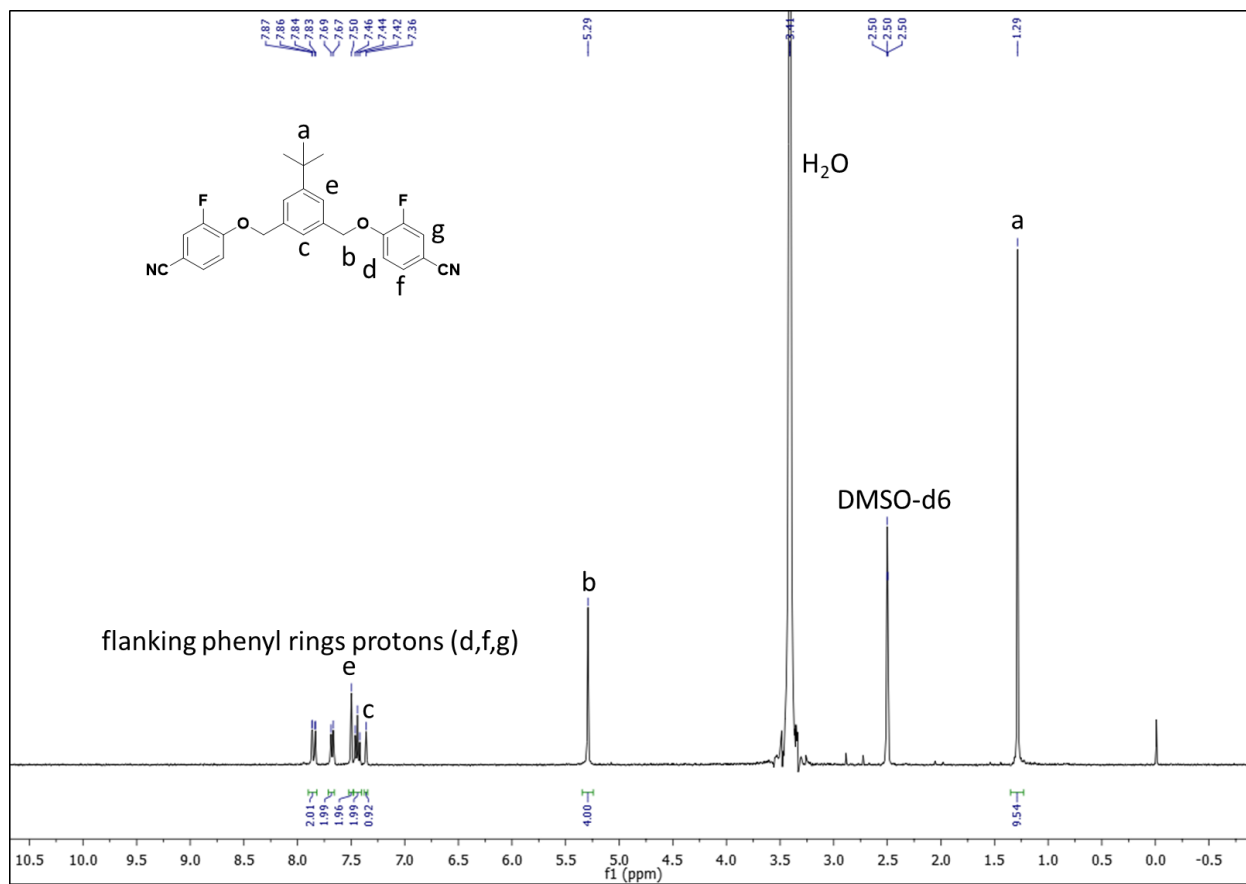

888

889

890

891

892

893

894

895

896

897

898

899

900

901

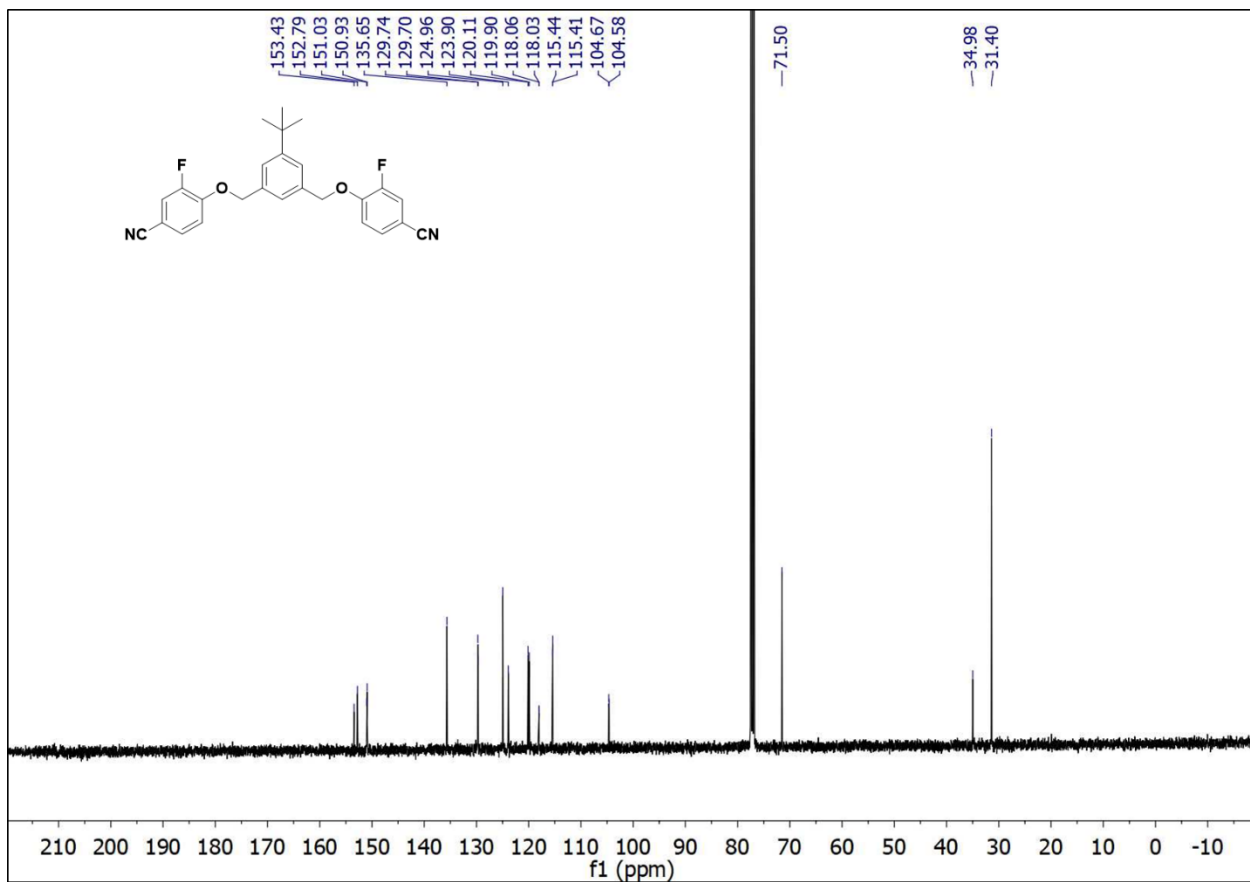

902

903

904

905

906

907

908

909

910

911

912

913

914

915

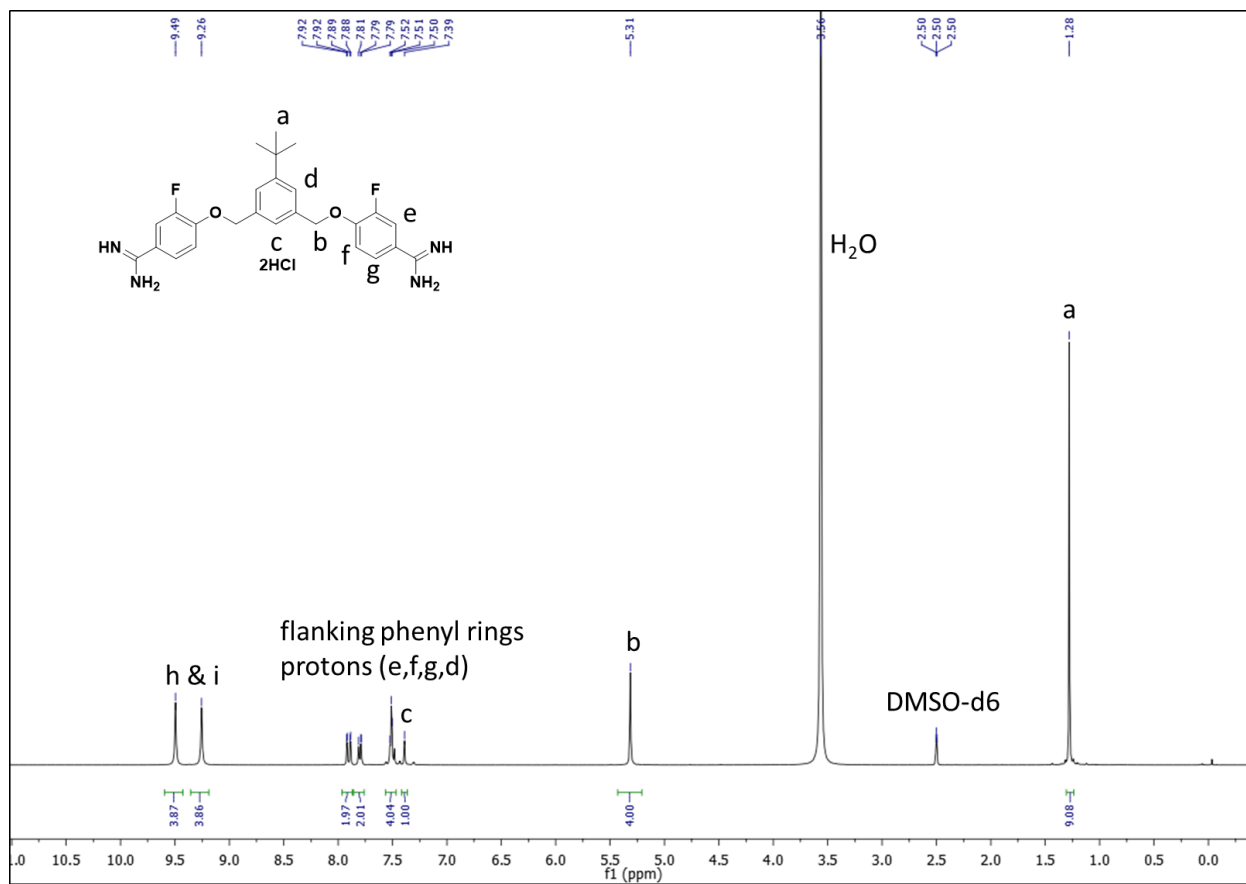

916

917

918

919

920

921

922

923

924

925

926

927

928

929

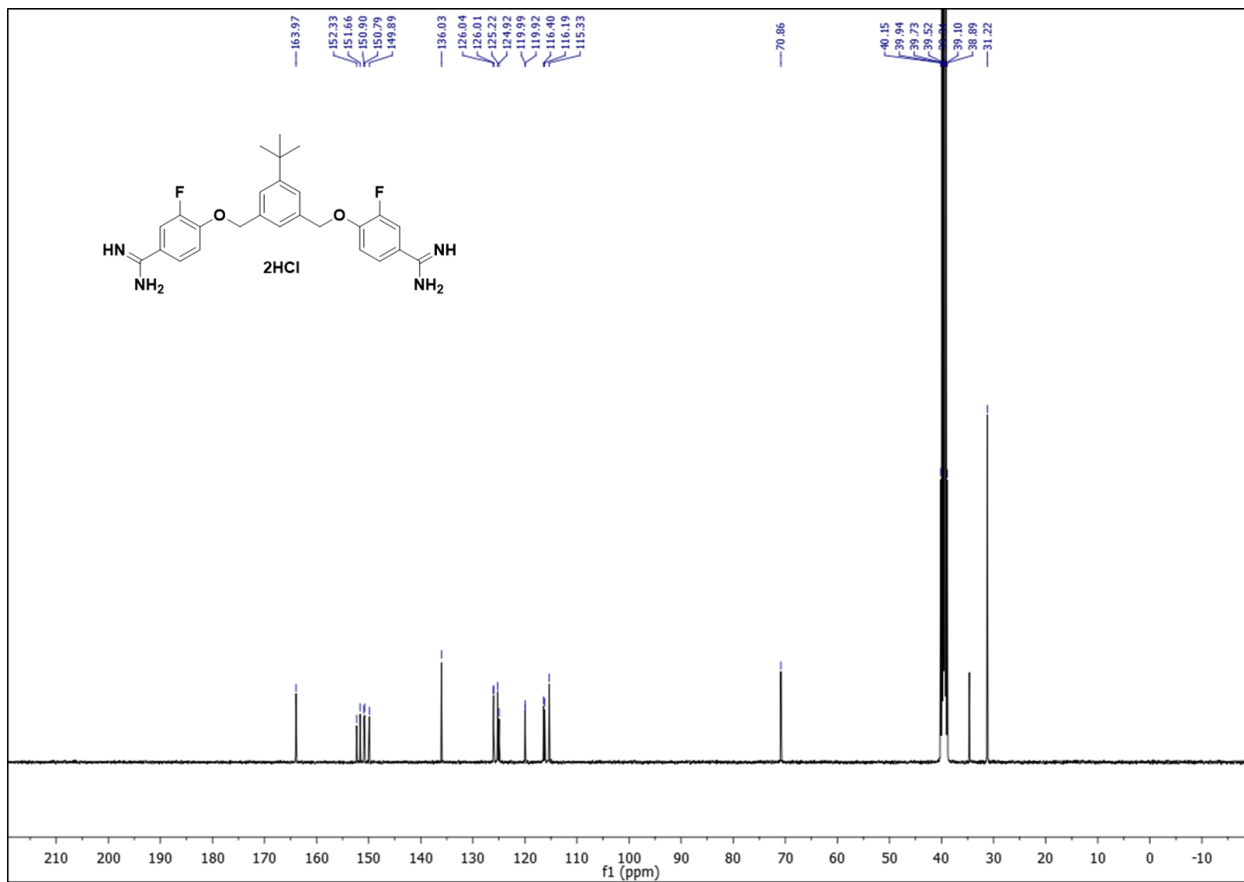

930

931

932

933

934

935

936

937

938

939

940

941

942

943



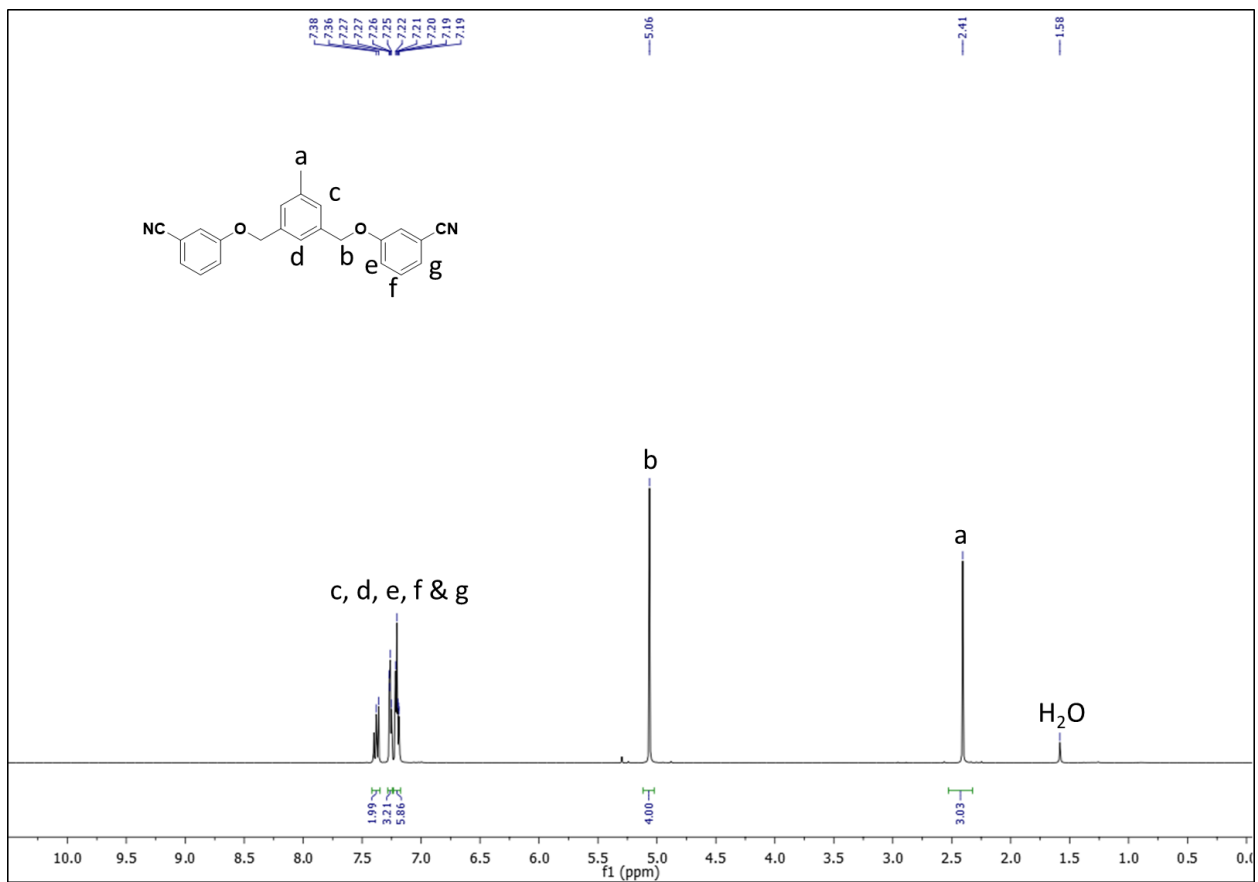

944

945

946

947

948

949

950

951

952

953

954

955

956

957

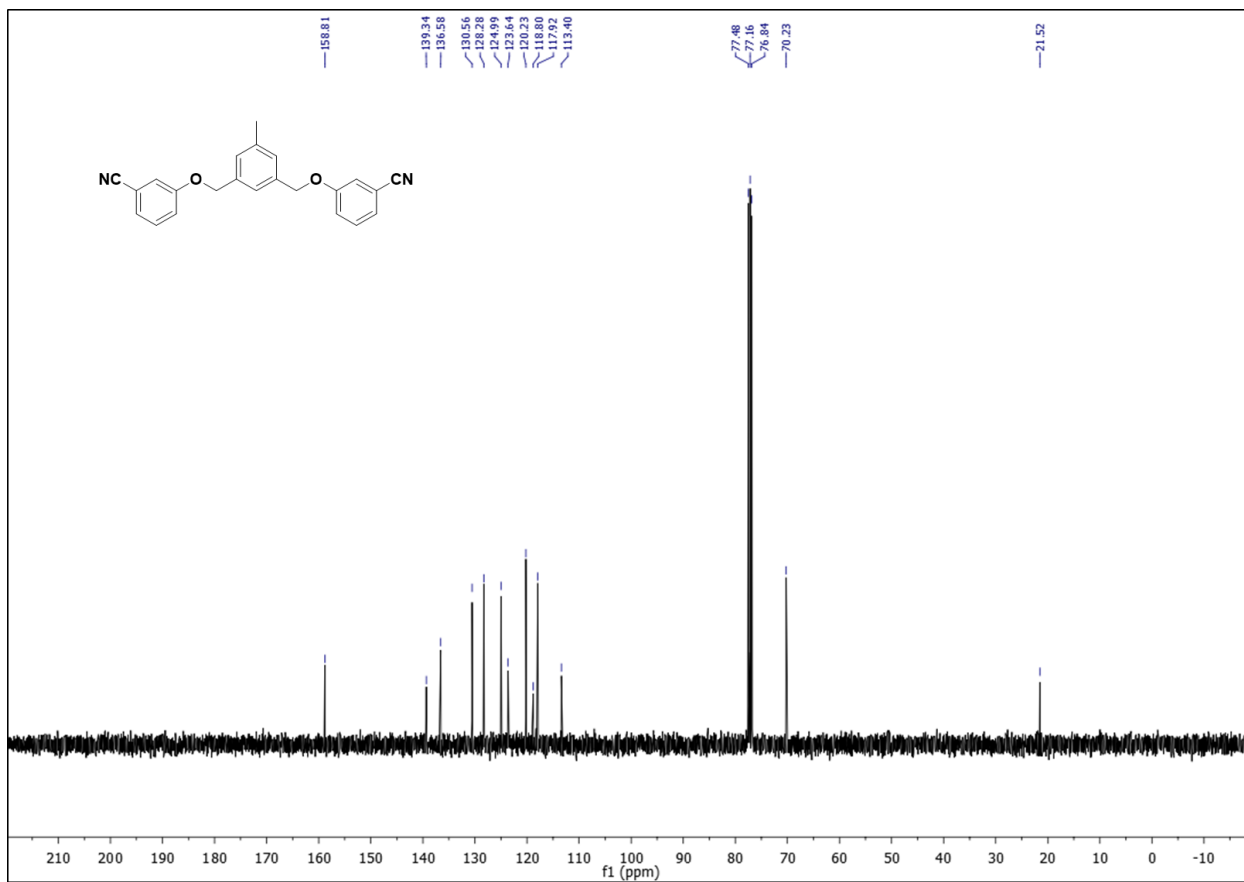

958

959

960

961

962

963

964

965

966

967

968

969

970

971

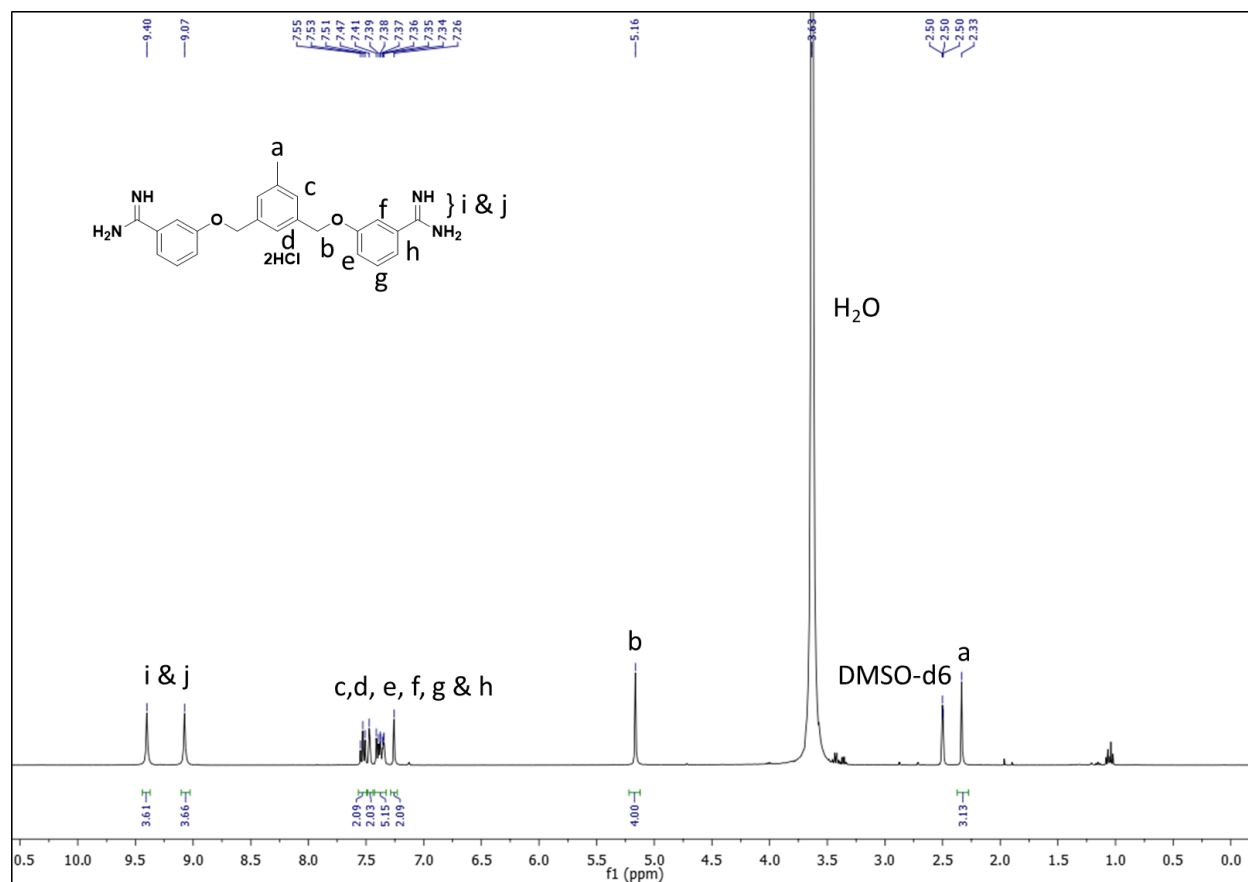

972

973

974

975

976

977

978

979

980

981

982

983

984

985

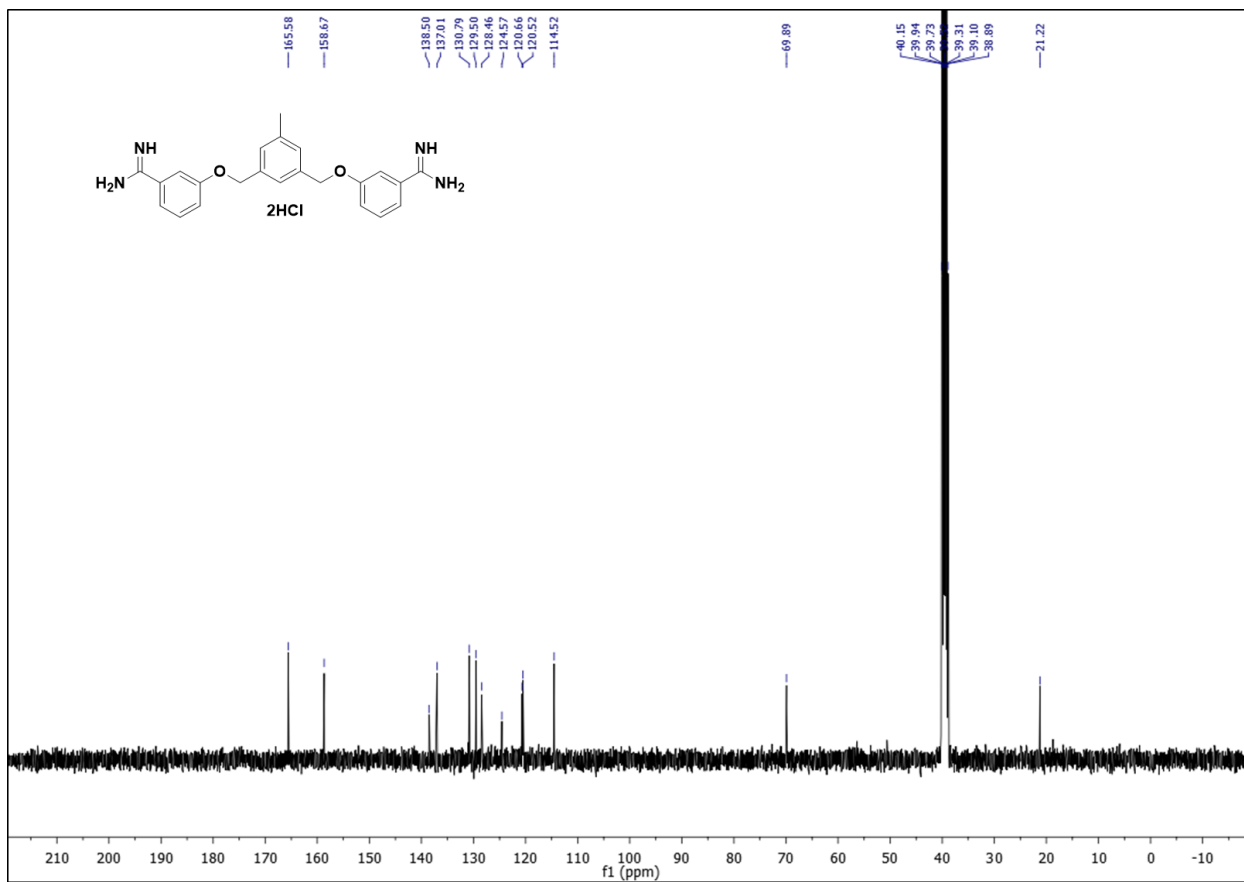

986

987

988

989

990

991

992

993

994

995

996

997

998

999

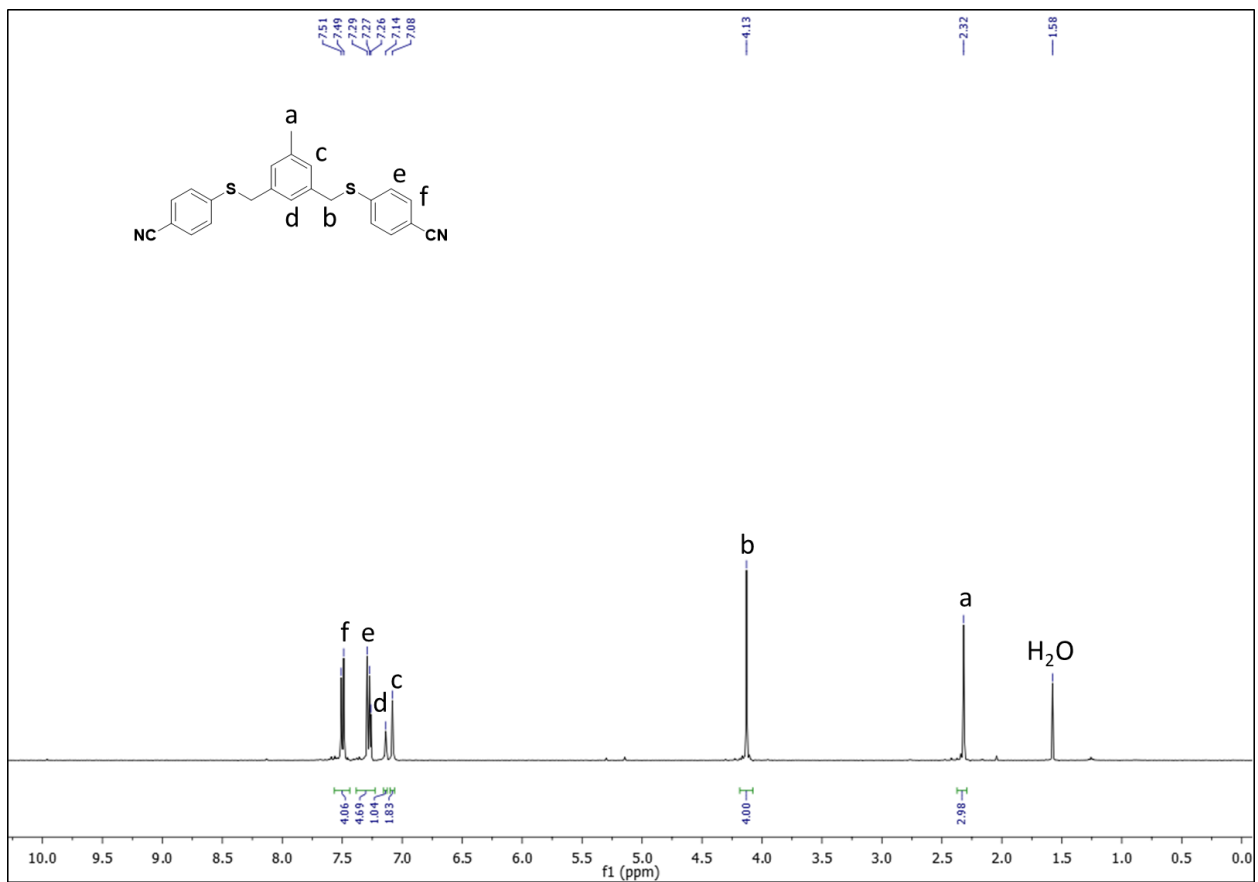

1000  
1001  
1002  
1003  
1004  
1005  
1006  
1007  
1008  
1009  
1010  
1011  
1012  
1013  
1014

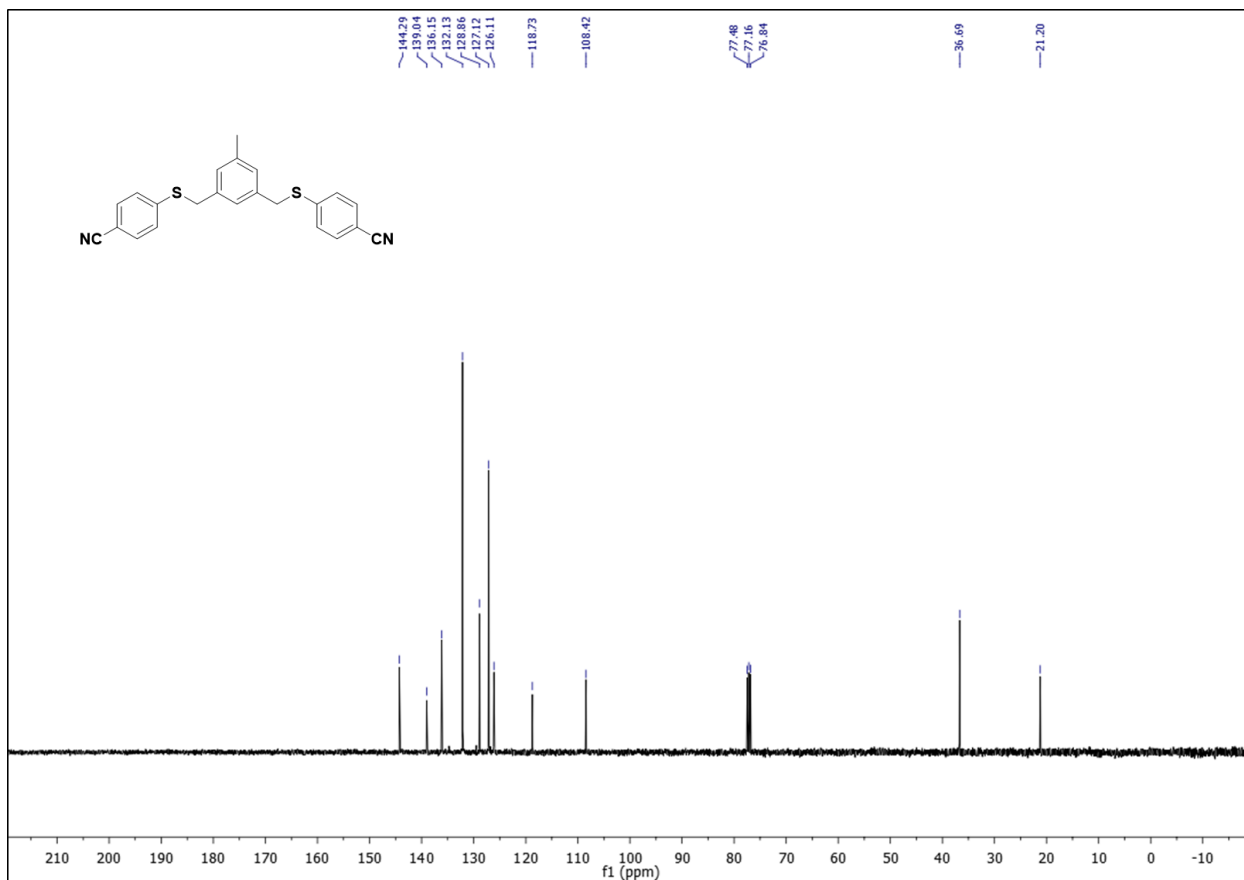

1015

1016

1017

1018

1019

1020

1021

1022

1023

1024

1025

1026

1027

1028

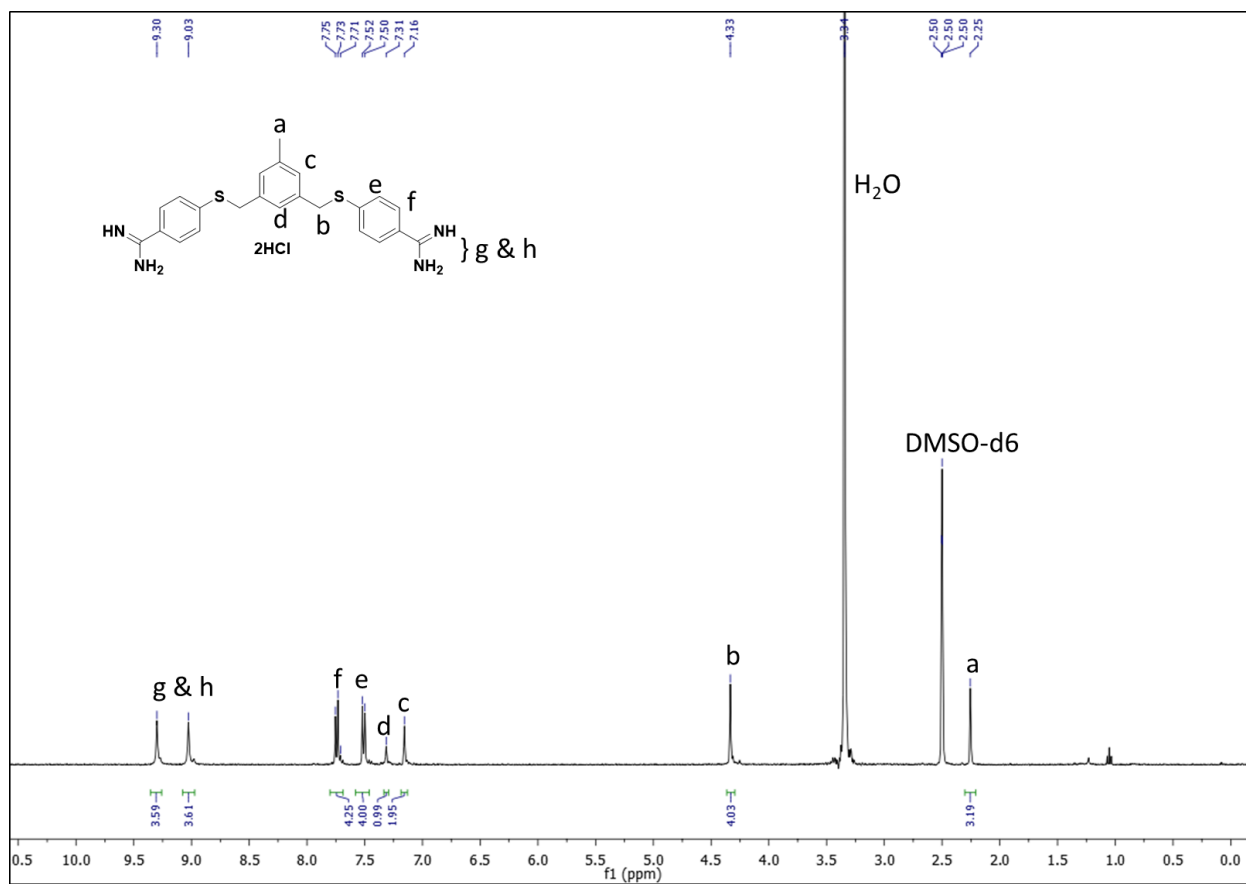

1029

1030

1031

1032

1033

1034

1035

1036

1037

1038

1039

1040

1041

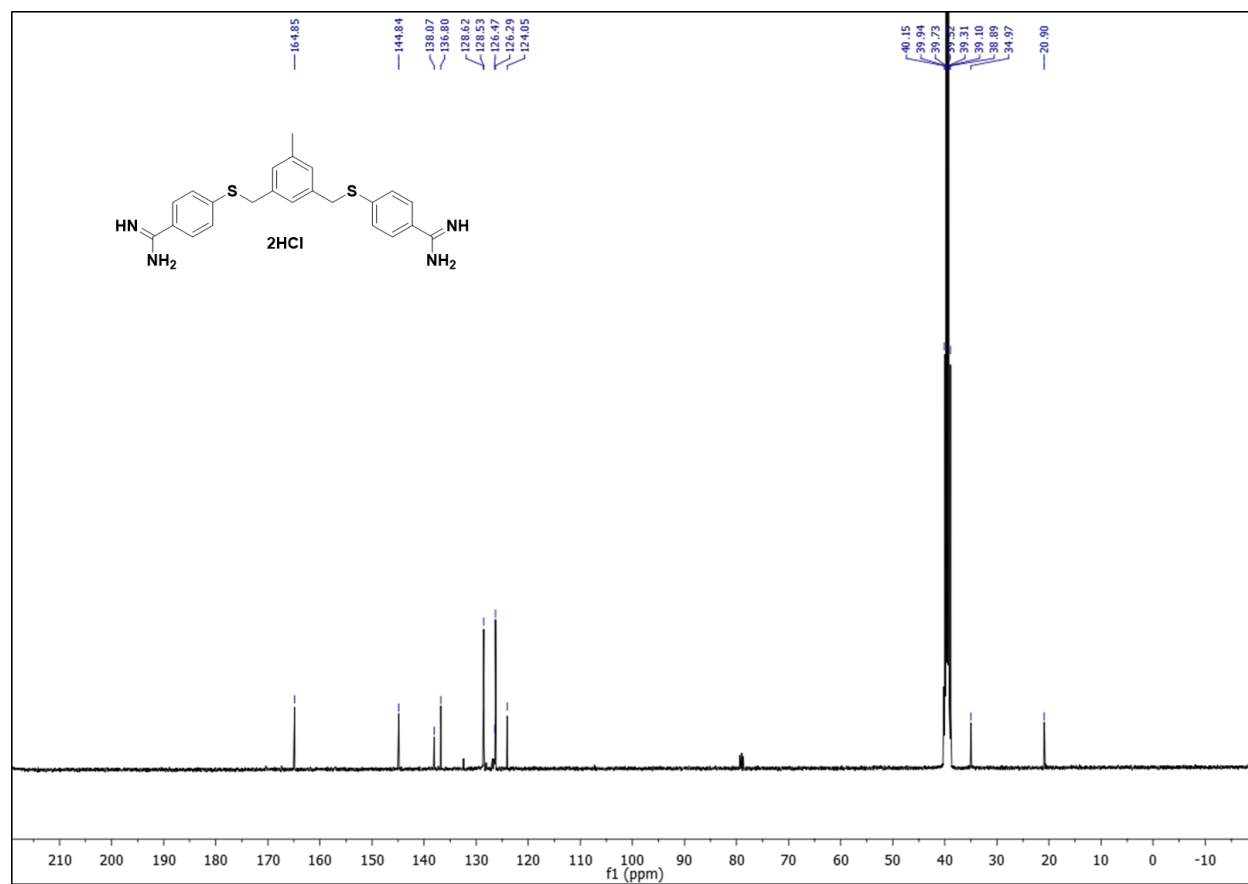

1042

1043

1044

1045

1046

1047

1048

1049

1050

1051

1052

1053

1054

1055



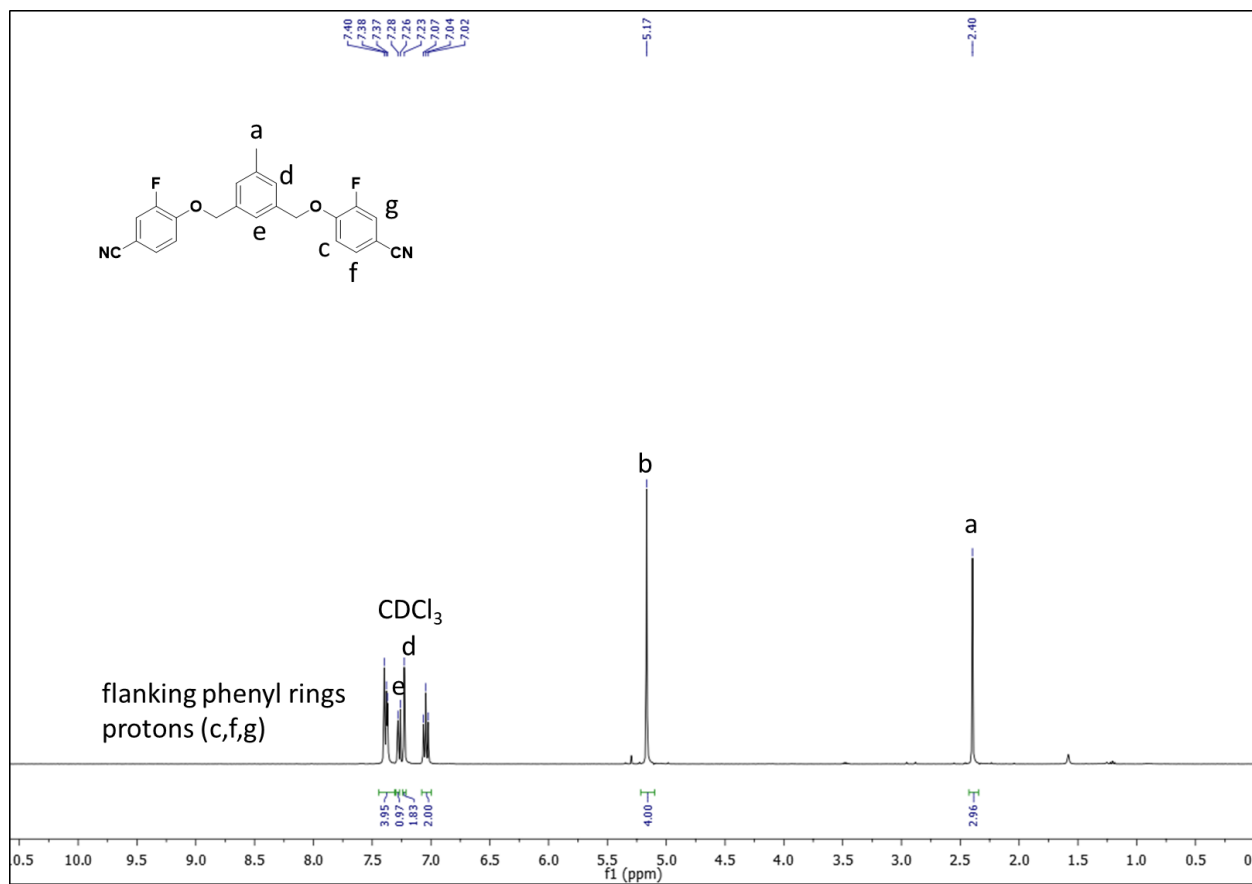

1056

1057

1058

1059

1060

1061

1062

1063

1064

1065

1066

1067

1068

1069

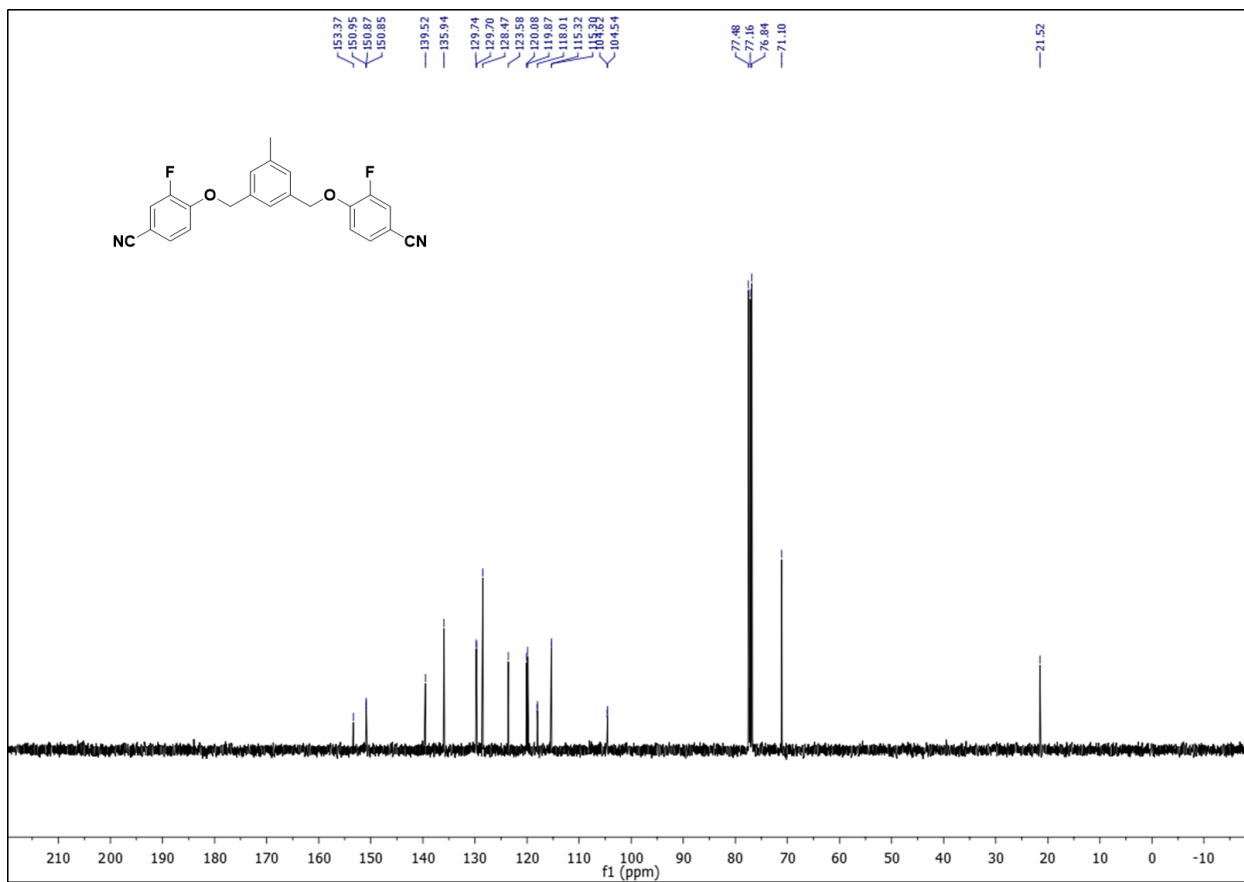

1070

1071

1072

1073

1074

1075

1076

1077

1078

1079

1080

1081

1082

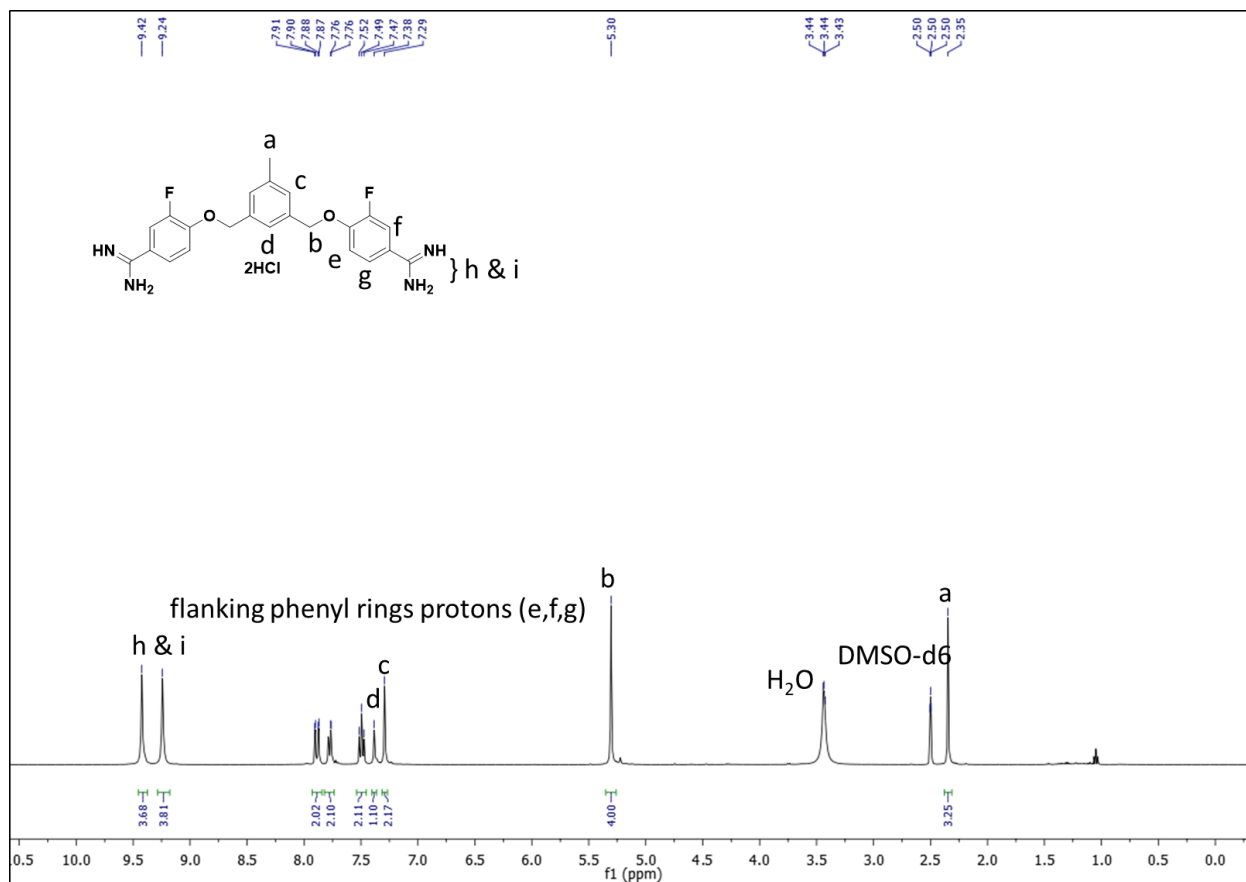

1083

1084

1085

1086

1087

1088

1089

1090

1091

1092

1093

1094

1095

1096

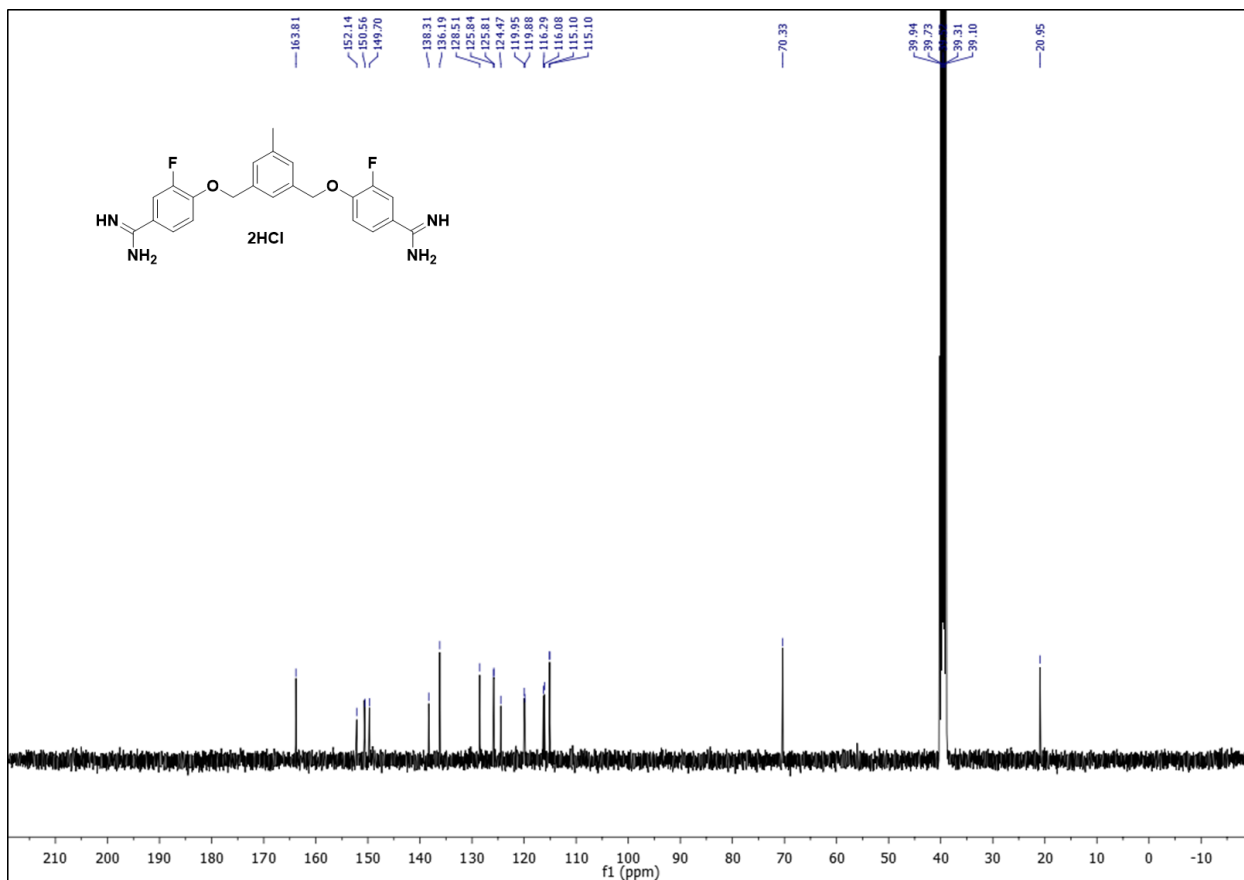

1097

1098

1099

1100

1101

1102

1103

1104

1105

1106

1107

1108

1109

1110

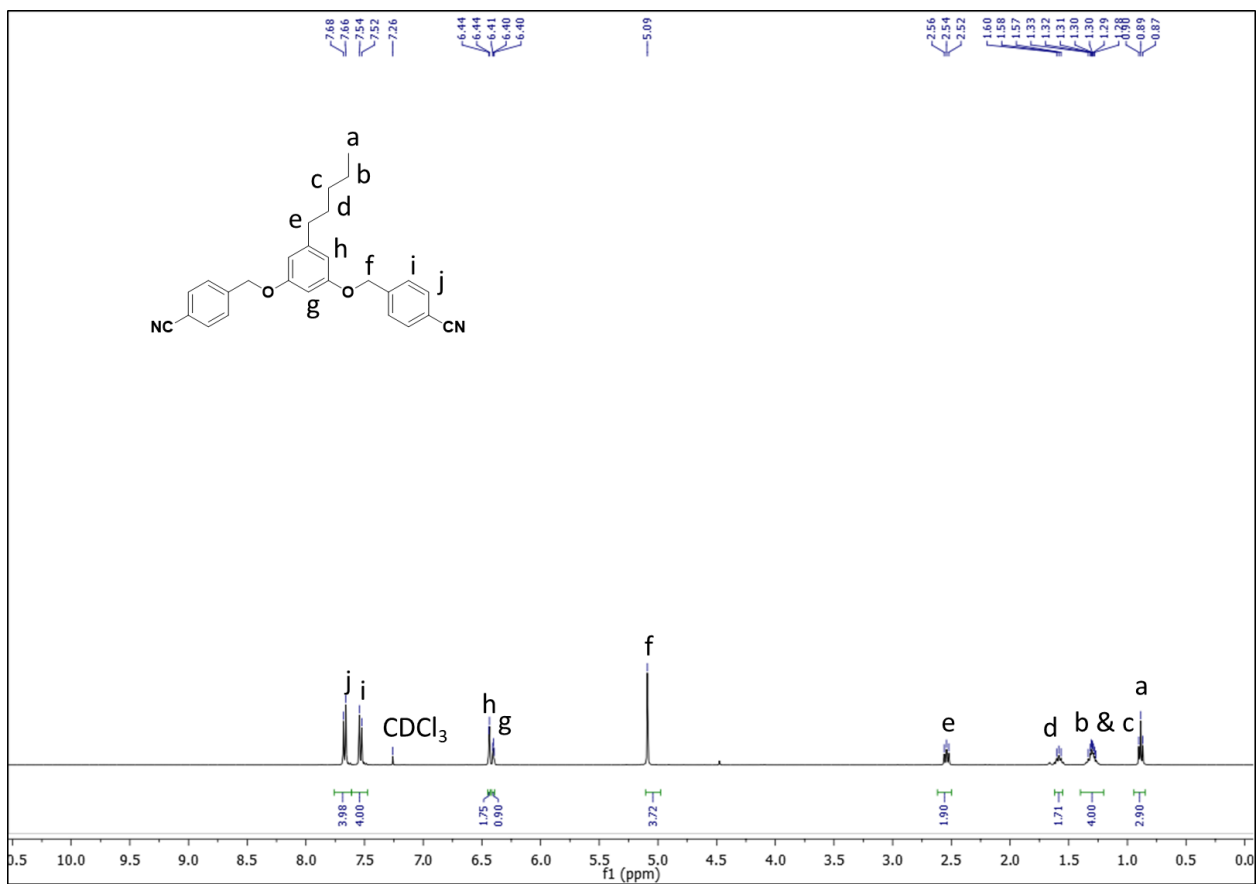

1111

1112

1113

1114

1115

1116

1117

1118

1119

1120

1121

1122

1123

1124

1125

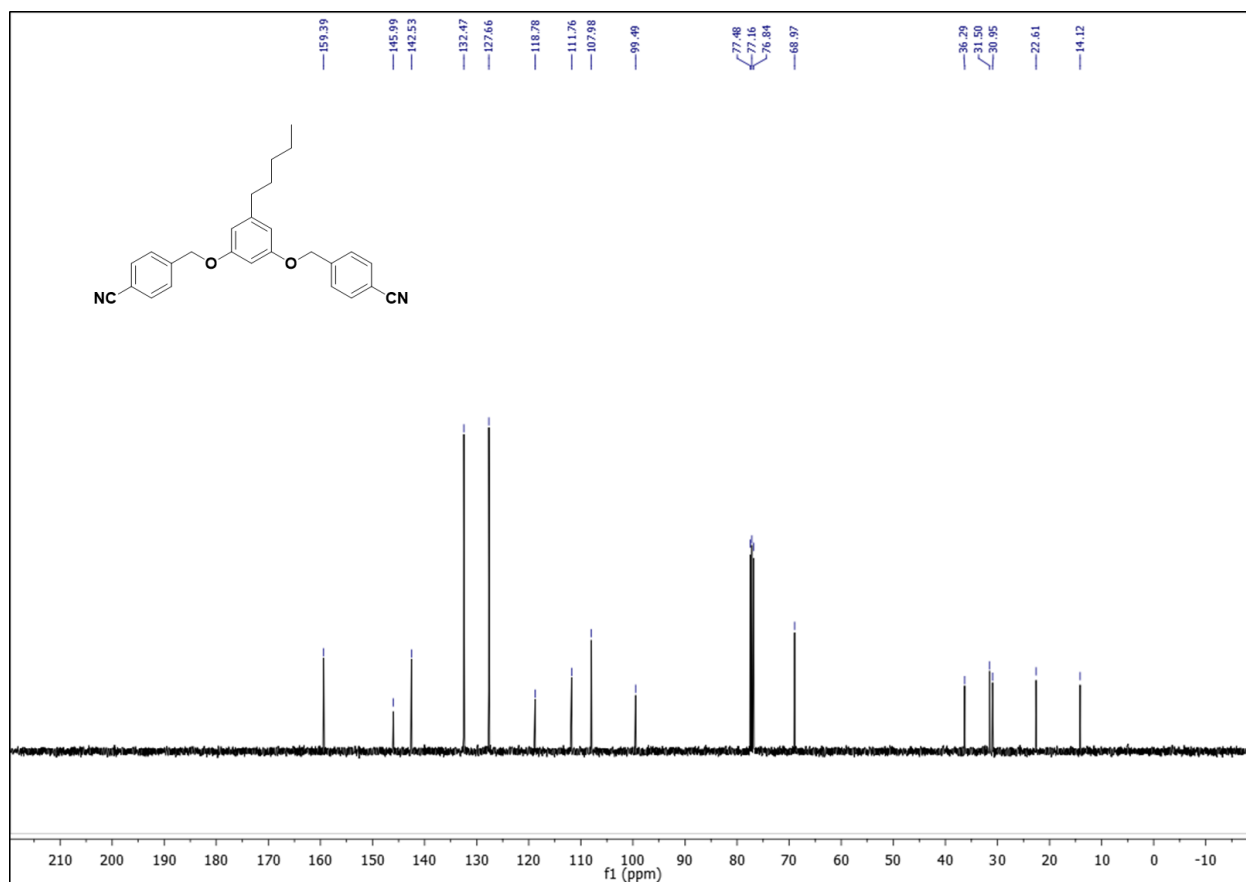

1126

1127

1128

1129

1130

1131

1132

1133

1134

1135

1136

1137

1138

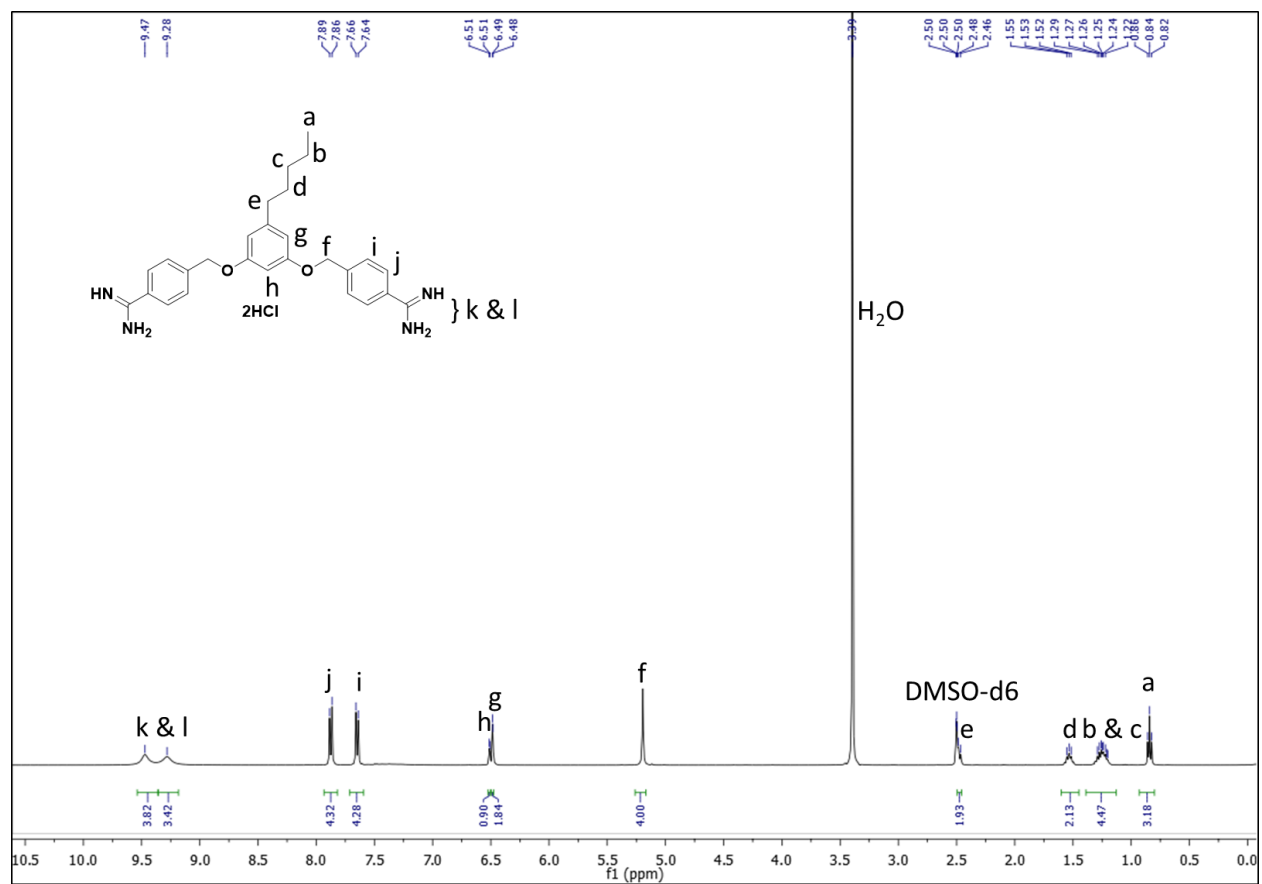

1139

1140

1141

1142

1143

1144

1145

1146

1147

1148

1149

1150

1151

1152

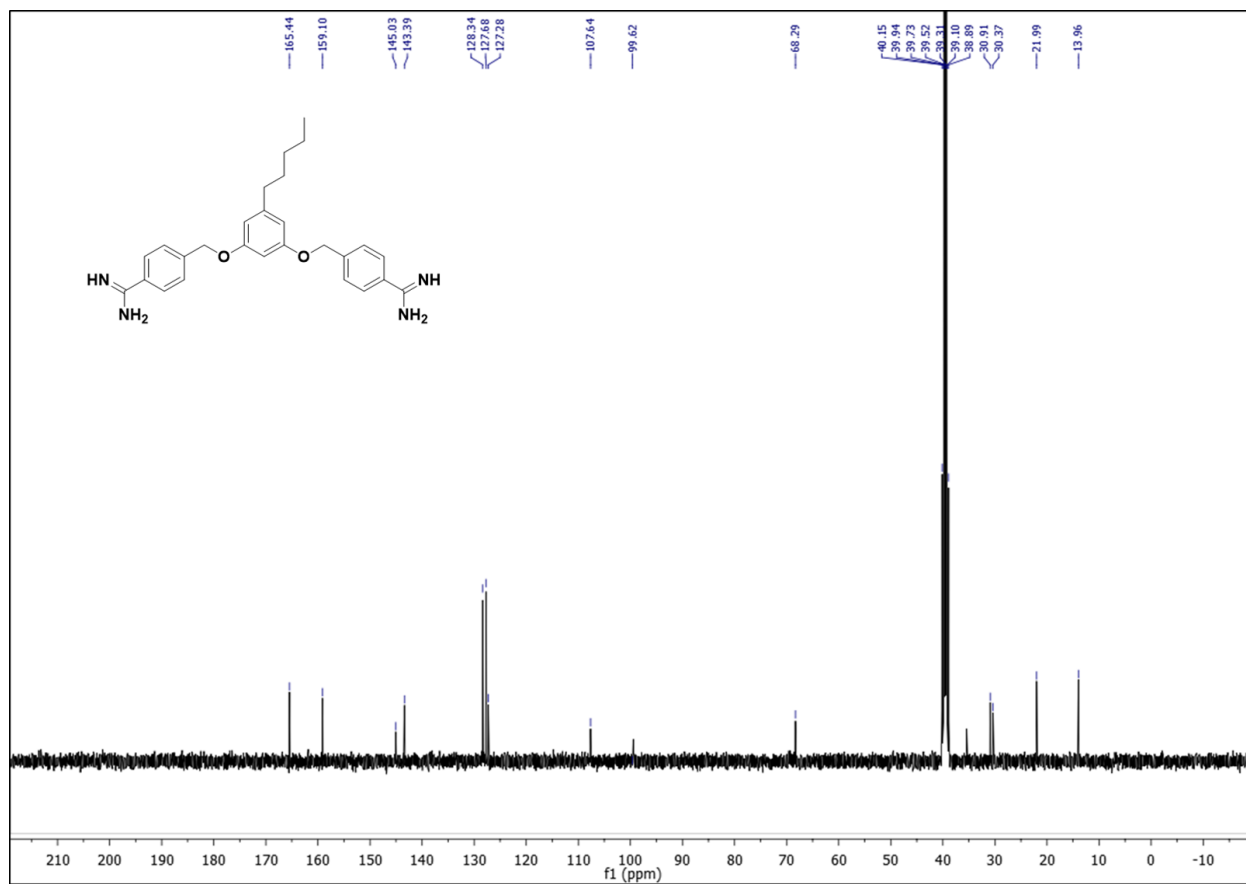

1153

1154

1155

1156

1157

1158



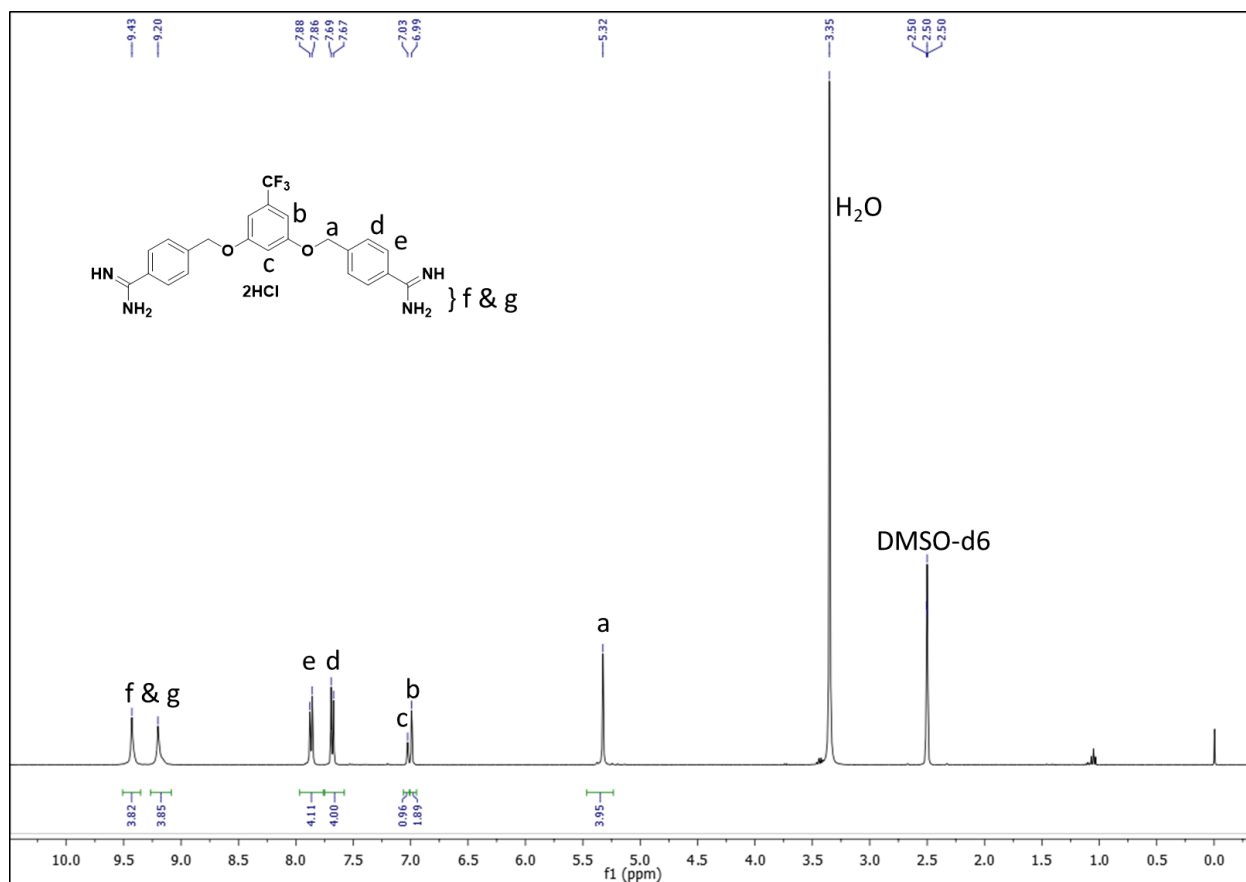

1159

1160

1161

1162

1163

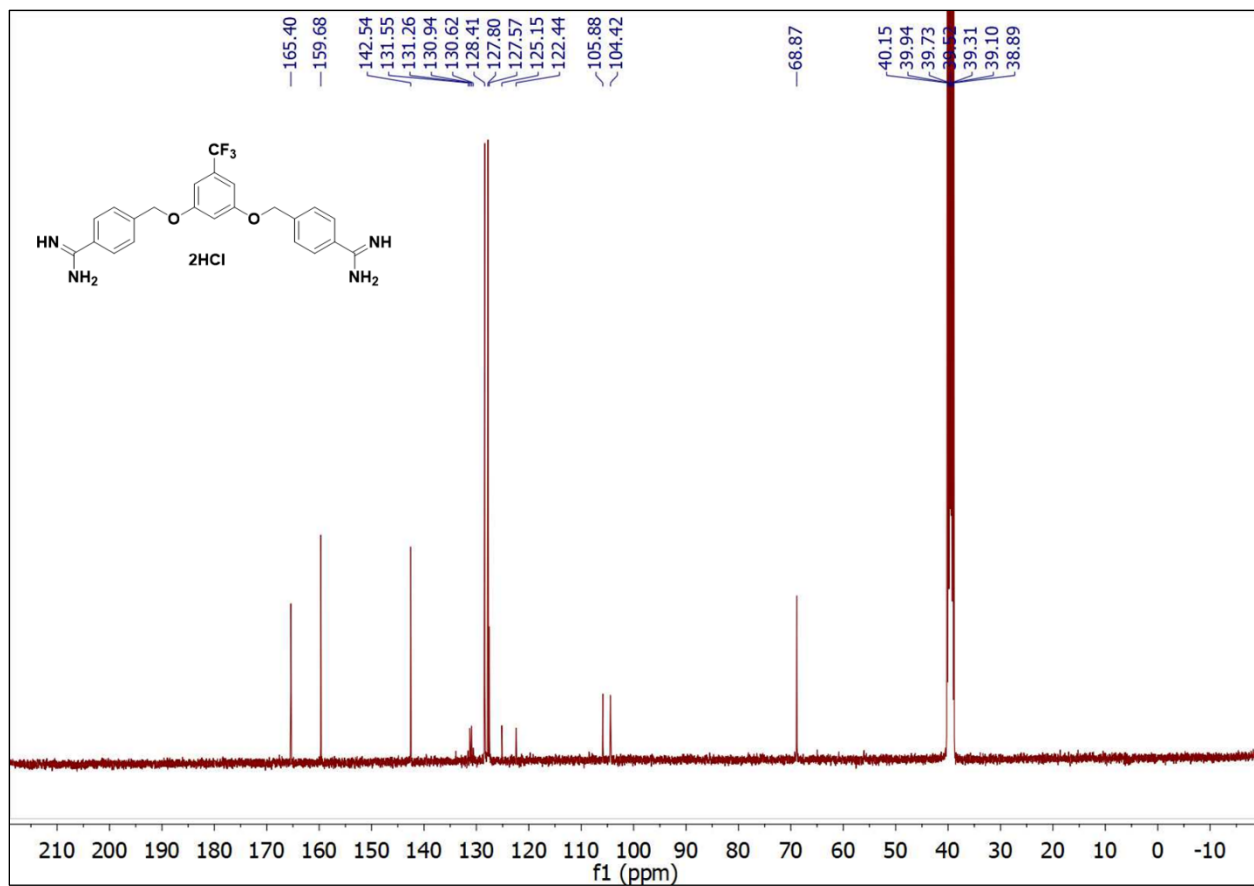

1164

1165

1166

1167

1168

1169

1170

1171

1172

1173

1174

1175

1176

1177

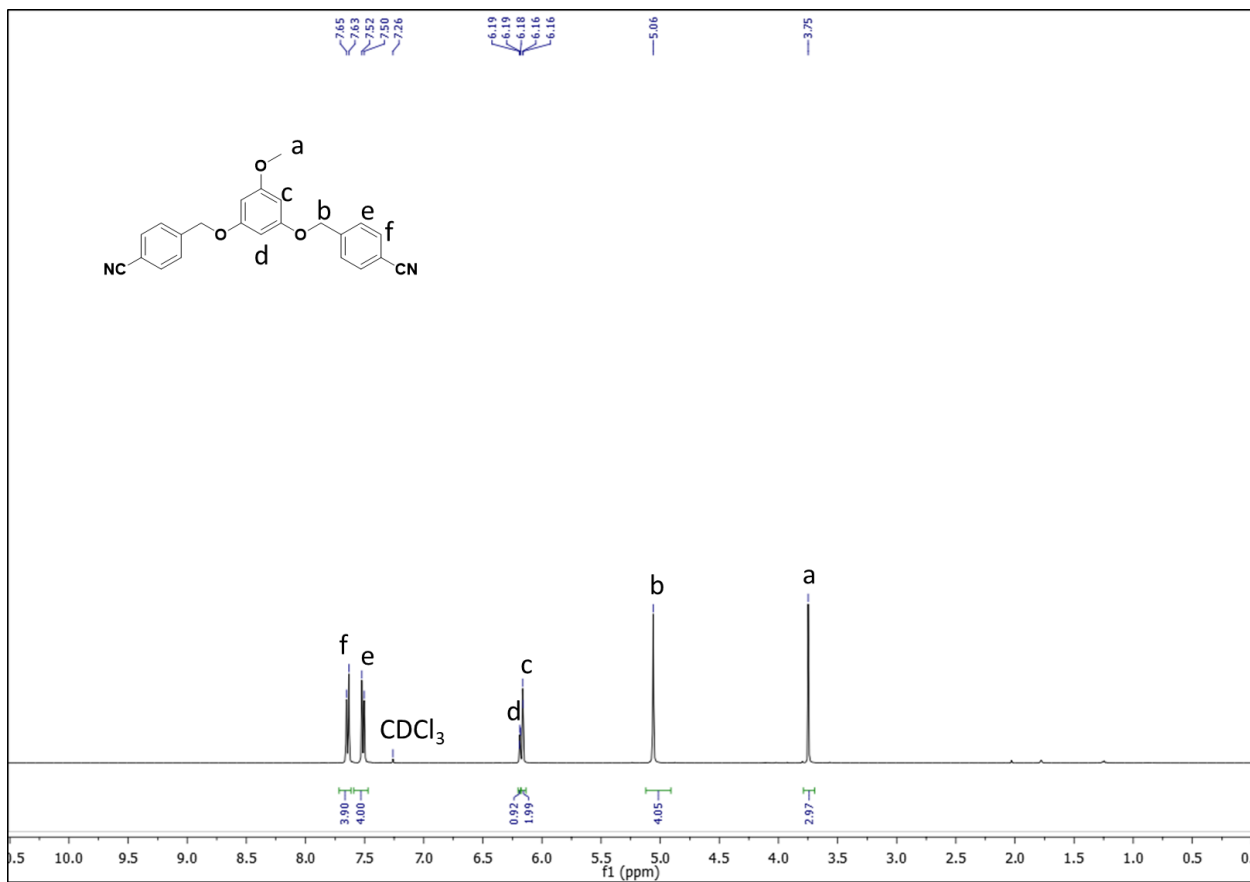

1178

1179

1180

1181

1182

1183

1184

1185

1186

1187

1188

1189

1190

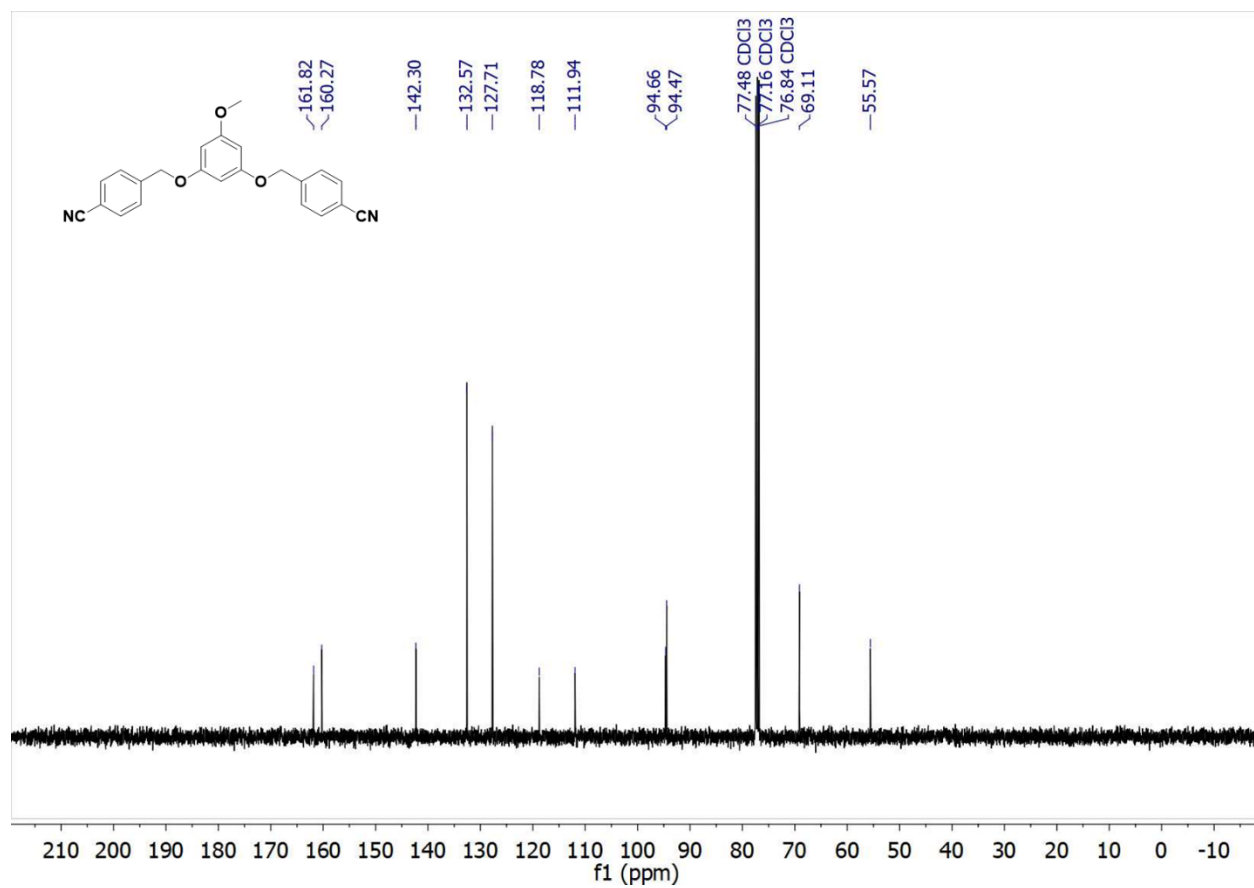

1191

1192

1193

1194

1195

1196

1197

1198

1199

1200

1201

1202

1203

1204

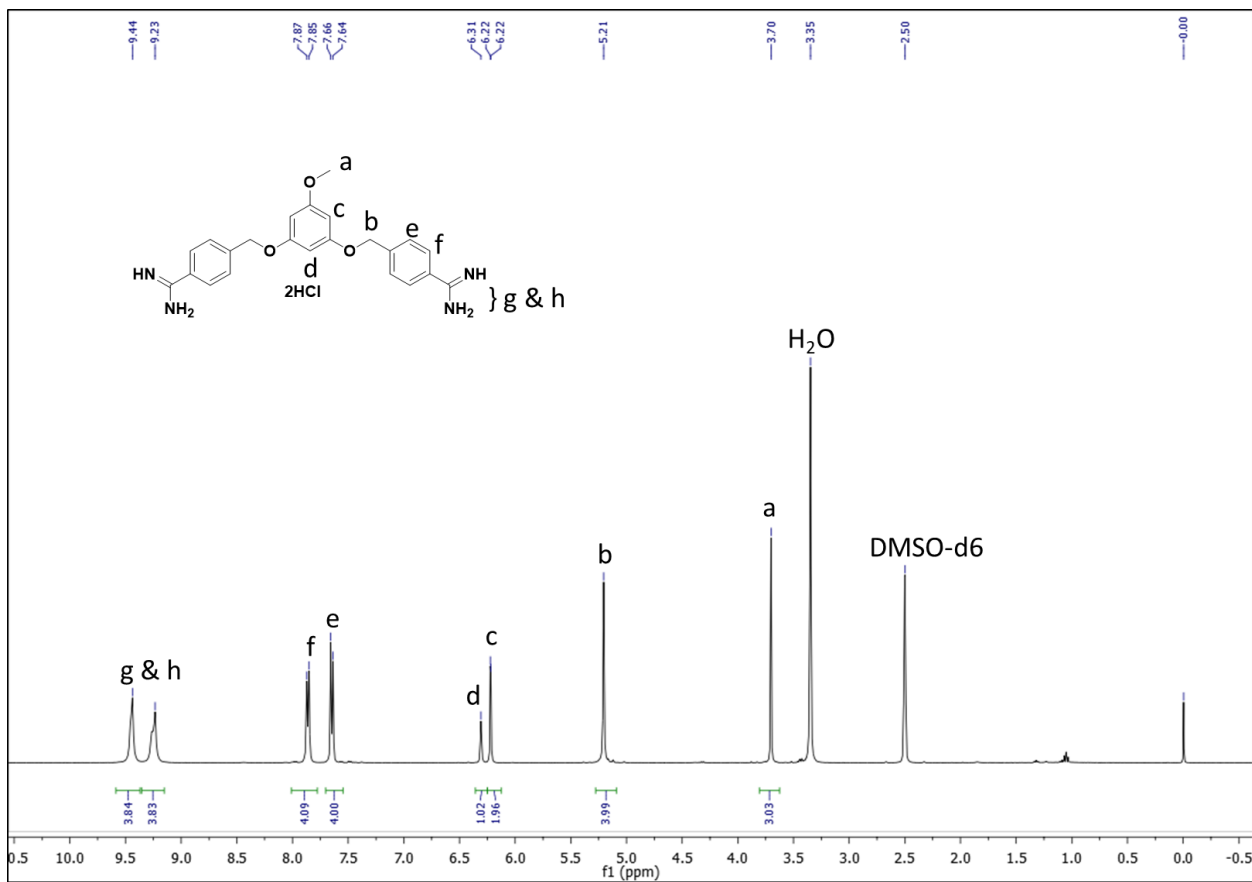

1205

1206

1207

1208

1209

1210

1211

1212

1213

1214

1215

1216

1217

1218

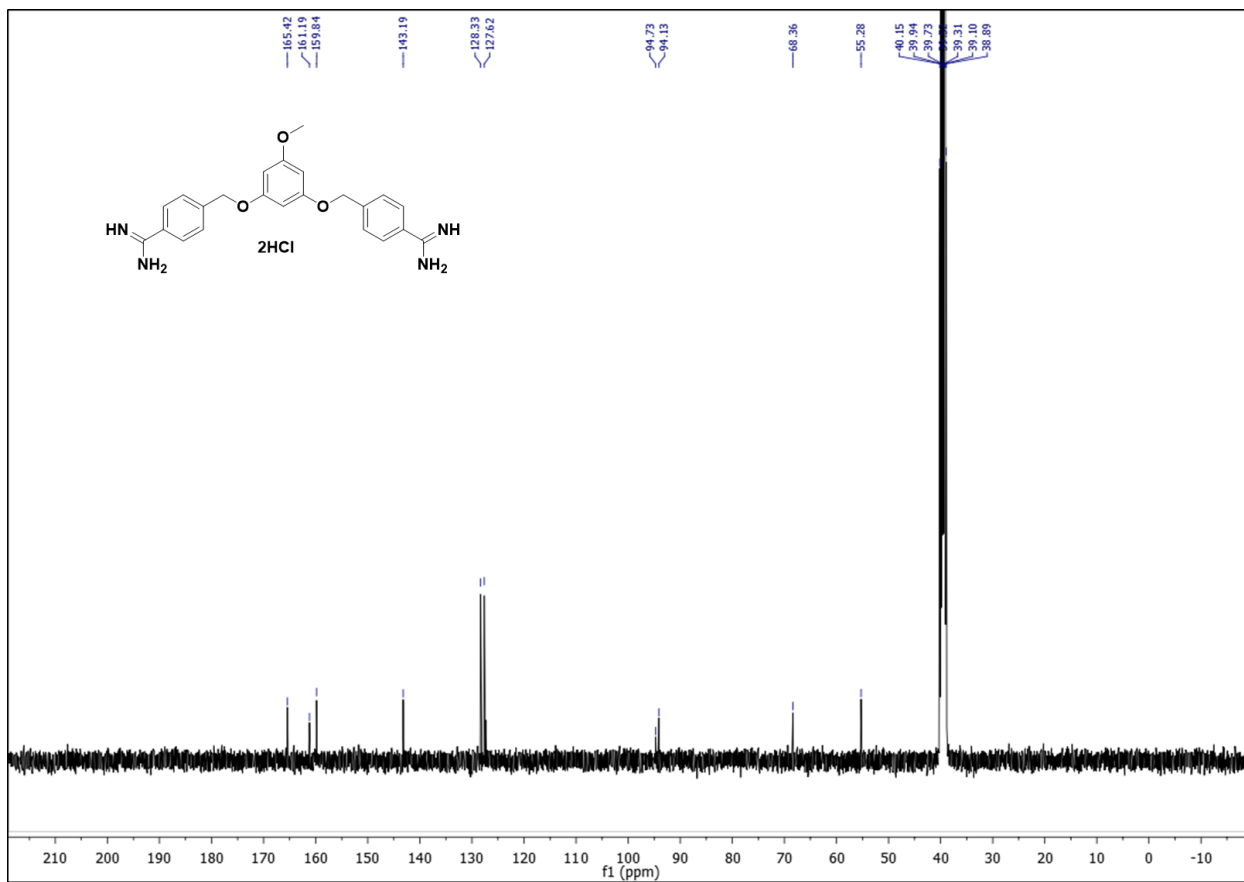

1219

1220
